# Supplementary material for: Iridium-catalyzed direct asymmetric reductive amination of aromatic ketones
Source: Royal Society of Chemistry journal article supplement (doi:10.1039/c7qo00400a), 2017-01-01

## Supporting Information

# Iridium-catalyzed Direct Asymmetric Reductive Amination of Aromatic Ketones

Haizhou Huang,<sup>a</sup> Zitong Wu,<sup>a</sup> Guori Gao,<sup>b</sup> Le Zhou<sup>a</sup> and Mingxin Chang<sup>\*a</sup>

<sup>a</sup>Shaanxi Key Laboratory of Natural Products & Chemical Biology, College of Chemistry and Pharmacy, Northwest A&F University, 22 Xinong Road, Yangling, Shaanxi 712100, PR China

<sup>b</sup>College of Chemistry, Chemical Engineering and Materials Science, Collaborative Innovation Center of Functionalized Probes for Chemical Imaging in Universities of Shandong, Shandong Normal University, 88 Wenhudong Road, Jinan 250014, PR China.

Phone/fax: (+86)-29-8709-2662; e-mail: mxchang@nwsuaf.edu.cn

## CONTENTS

|     |                                                            |     |
|-----|------------------------------------------------------------|-----|
| I   | General Remarks                                            | S2  |
| II  | General Procedure for Preparation of Monophos-type Ligands | S2  |
| III | General Procedure for Asymmetric Reductive Amination       | S2  |
| IV  | General Procedure for Removal of Diphenylmethyl Group      | S23 |
| V   | References                                                 | S25 |
| VI  | NMR & HRMS Spectra                                         | S26 |

## I. General remarks

All reactions were performed in the nitrogen-filled glovebox or under nitrogen using standard Schlenk techniques unless otherwise noted. Chemicals were purchased from Adamas, Energy Chemicals and other companies. Column chromatography was performed using silica gel 60 (200–300 mesh).  $^1\text{H}$  NMR and  $^{13}\text{C}$  NMR spectral data were obtained from Bruker 500 MHz spectrometers. Chemical shifts are reported in ppm. Enantiomeric excess values were determined by chiral HPLC on an Agilent 1220 Series instrument or by  $^1\text{H}$  NMR using (*S*)-2-acetoxy-2-phenylacetic acid as shift reagent. All new products were further characterized by HRMS. A positive ion mass spectrum of sample was acquired on a Thermo Scientific LTQ Orbitrap XL mass spectrometer with an electrospray ionization source.

## II. General Procedure for Preparation of Monophos-type ligands

Ligands **L1a–e** were synthesized according to the reported procedures.<sup>[1]</sup>

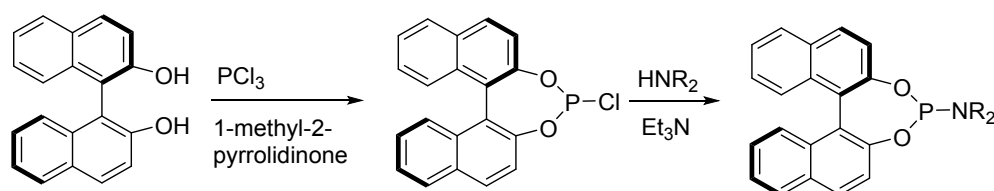

A 25 mL Schlenk flask was charged with (*R*)-(+)-1,1'-bi(2-naphthol) (0.57g, 2 mmol), phosphorus trichloride (2.74 g, 20 mmol, 10 equiv), 1-methyl-2-pyrrolidinone (1.6  $\mu\text{L}$ , 0.02 mmol, 0.008 equiv) under nitrogen. The reaction mixture was heated to 90  $^\circ\text{C}$  for 15 min, and all volatiles were removed under reduced pressure.  $\text{CH}_2\text{Cl}_2$  (2 mL  $\times$  2) was used to remove the traces of phosphorus trichloride. The resulting oil was vacuummed for 3 h to give the pale solid which was used directly in next step.

A 25 mL round-bottom flask was charged with 2 mmol of corresponding amine, 3 mmol of  $\text{Et}_3\text{N}$  and 10 ml toluene. The above made chlorophosphite was dissolved in 5 mL toluene and was transferred to the reaction flask. The mixture was stirred for 3 h. The solid was removed by filtration. The filtrate was concentrated and purified by flash column chromatography (EtOAc/Hex) to yield desired ligand (yield: 75–95%).

## III. General Procedure for Asymmetric Reductive amination

In a nitrogen-filled glovebox, the complex (0.5 mol%) prepared from *in situ* from  $[\text{Ir}(\text{COD})\text{Cl}]_2$  and **L1d** in anhydrous  $\text{CH}_2\text{Cl}_2$  was added to 4-acetoanisole **1a** (0.3 mmol) and diphenylmethylamine **2** (0.39 mmol) in anhydrous  $\text{CH}_2\text{Cl}_2$  solution (1.0 mL). Then 4 $\text{\AA}$  molecular sieves (0.15 gram),  $\text{Ti}(\text{O}i\text{-Pr})_4$  (0.2 equiv.), and trifluoroacetic acid (0.5 equiv.) were added subsequently and the total solution was made to 3.0 mL. The resulting vial was transferred to an autoclave, which was charged with 60 atm of  $\text{H}_2$ , and stirred at 50  $^\circ\text{C}$  for 24 h. The hydrogen gas was released slowly and the solution was neutralized with aqueous sodium bicarbonate solution. The organic phase was concentrated and passed through a short column of silica gel to remove the metal complex to give the 80mg chiral amine product, which was then analyzed by chiral HPLC to determine the enantiomeric excesses.

$^1\text{H}$  NMR method for determination the ee values: The amine product **3** was mixed with equal amount (mol/mol) of (*S*)-2-acetoxy-2-phenylacetic acid and dissolved in  $\text{CDCl}_3$ . Diastereoisomers are formed and the proton signal of amine  $\beta$ -methyl will be splitted. From integration ratio the ee value could be calculated.

***N*-benzhydryl-1-(4-methoxyphenyl)ethan-1-amine (3a)**: 84% yield, 97% ee, clear oil, unknown compound.  $[\alpha]_D^{25} = -49.1^\circ$  ( $c = 0.3$ , MeOH).  $^1\text{H NMR}$  (500 MHz,  $\text{CDCl}_3$ )  $\delta$  7.39 (d,  $J = 4.9$  Hz, 4H), 7.31 (dd,  $J = 14.1, 6.5$  Hz, 5H), 7.23 (d,  $J = 8.6$  Hz, 3H), 6.94 (d,  $J = 8.5$  Hz, 2H), 4.69 (s, 1H), 3.88 (s, 3H), 3.69 (q,  $J = 6.5$  Hz, 1H), 1.41 (d,  $J = 6.6$  Hz, 3H).  $^{13}\text{C NMR}$  (125 MHz,  $\text{CDCl}_3$ )  $\delta$  158.5, 144.7, 143.7, 137.7, 128.5, 128.4, 127.7, 127.7, 127.4, 127.0, 126.8, 113.8, 63.7, 55.3, 54.5, 24.5. IR (KBr)  $\nu$ : 3308.0, 3060.4, 3024.8, 2962.8, 1504.6, 1243.8  $\text{cm}^{-1}$ . Enantiomeric excess was determined by chiral HPLC: Chiralpak IB-3 column, Hex/IPA = 99.5:0.5, 1 mL/min, 220 nm, 6.8 min, 7.4 min. HRMS calcd for  $\text{C}_{22}\text{H}_{22}\text{NO}$   $[\text{M}+\text{H}]^+$ : 318.18504, found: 318.18512.

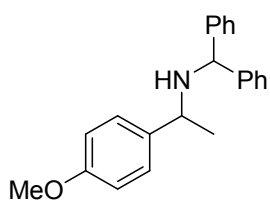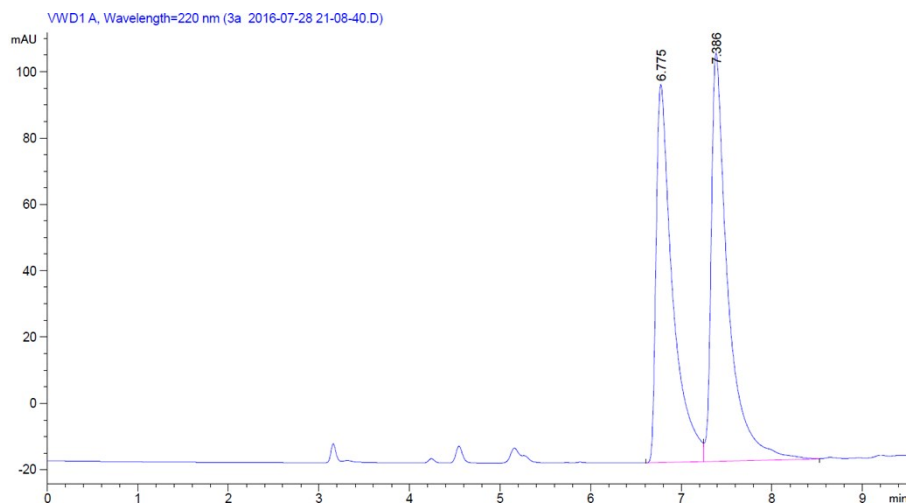

| Peak # | RetTime [min] | Type | Width [min] | Area [mAU*s] | Height [mAU] | Area %  |
|--------|---------------|------|-------------|--------------|--------------|---------|
| 1      | 6.775         | BV   | 0.1815      | 1440.24280   | 113.94901    | 47.6601 |
| 2      | 7.386         | VV   | 0.1819      | 1581.66492   | 123.11803    | 52.3399 |

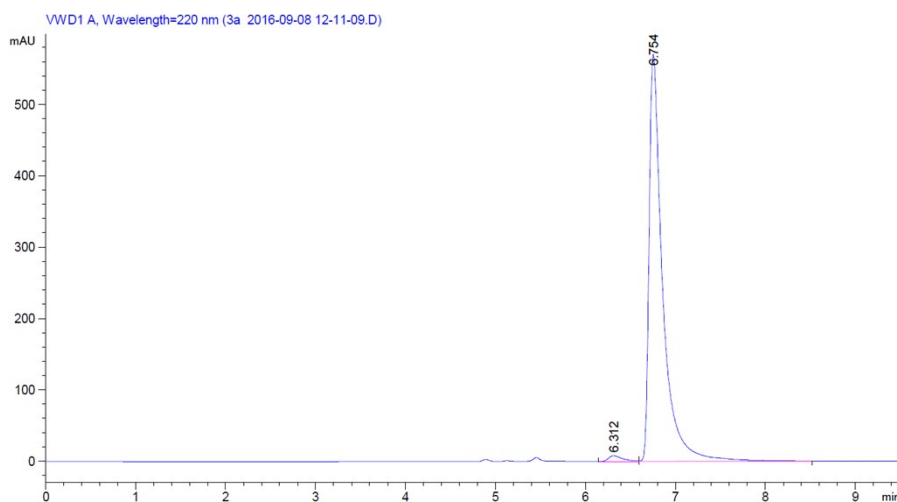

| Peak # | RetTime [min] | Type | Width [min] | Area [mAU*s] | Height [mAU] | Area %  |
|--------|---------------|------|-------------|--------------|--------------|---------|
| 1      | 6.312         | BV   | 0.1607      | 87.42606     | 8.05050      | 1.4493  |
| 2      | 6.754         | VB   | 0.1496      | 5945.05225   | 570.43250    | 98.5507 |

***N*-(1-(4-methoxyphenyl)ethyl)aniline(4):** <sup>[3]</sup> 77% yield, 29% ee, clear oil, known compound. <sup>1</sup>H NMR (500 MHz, CDCl<sub>3</sub>) δ 7.34 (d, *J* = 8.6 Hz, 2H), 7.20–7.08 (m, 2H), 6.91 (d, *J* = 8.7 Hz, 2H), 6.70 (t, *J* = 7.3 Hz, 1H), 6.57 (d, *J* = 7.7 Hz, 2H), 4.50 (q, *J* = 6.7 Hz, 1H), 3.84 (s, 3H), 1.55 (d, *J* = 6.7 Hz, 3H). Enantiomeric excess was determined by chiral HPLC: Chiralpak OD-H column, Hex/IPA = 90:10, 1 mL/min, 220 nm, 8.2 min, 10.4 min.

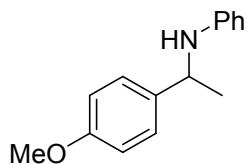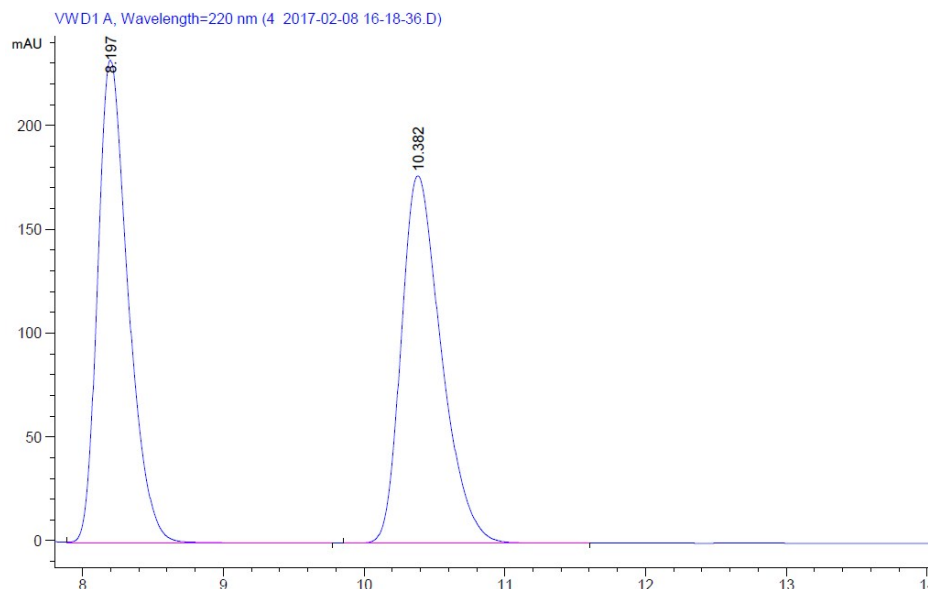

| Peak # | RetTime [min] | Type | Width [min] | Area [mAU*s] | Height [mAU] | Area %  |
|--------|---------------|------|-------------|--------------|--------------|---------|
| 1      | 8.197         | VB   | 0.2277      | 3500.34937   | 232.46826    | 50.0163 |
| 2      | 10.382        | BB   | 0.3017      | 3498.07080   | 176.92244    | 49.9837 |

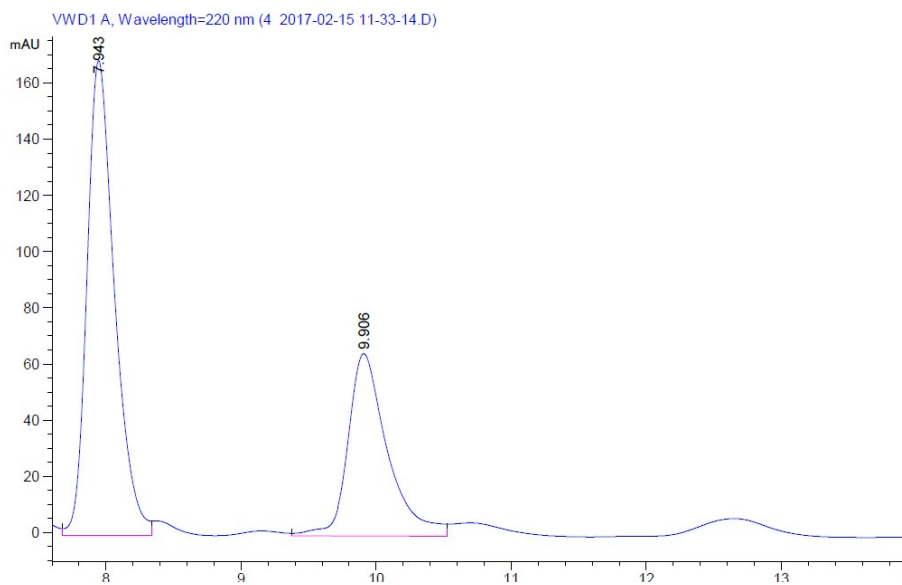

| Peak # | RetTime [min] | Type | Width [min] | Area [mAU*s] | Height [mAU] | Area %  |
|--------|---------------|------|-------------|--------------|--------------|---------|
| 1      | 7.943         | VV   | 0.2132      | 2395.19824   | 169.14493    | 64.4247 |
| 2      | 9.906         | VV   | 0.2986      | 1322.62549   | 64.93051     | 35.5753 |

***N*-benzyl-1-(4-methoxyphenyl)ethan-1-amine(5):**<sup>[4]</sup> 47% yield, 29% ee, clear oil, known compound. <sup>1</sup>H NMR (500 MHz, CDCl<sub>3</sub>) δ 7.38–7.27 (m, 7H), 6.94 (d, *J* = 8.7 Hz, 2H), 3.86 (s, 3H), 3.82 (q, *J* = 6.6 Hz, 1H), 3.74–3.59 (m, 2H), 1.40 (d, *J* = 6.6 Hz, 3H). Enantiomeric excess was determined by chiral HPLC for the corresponding acetamide: Chiralpak OD-H column, Hex/IPA = 90:10, 1 mL/min, 220 nm, 11.8 min, 13.5 min.

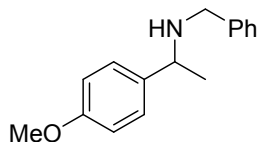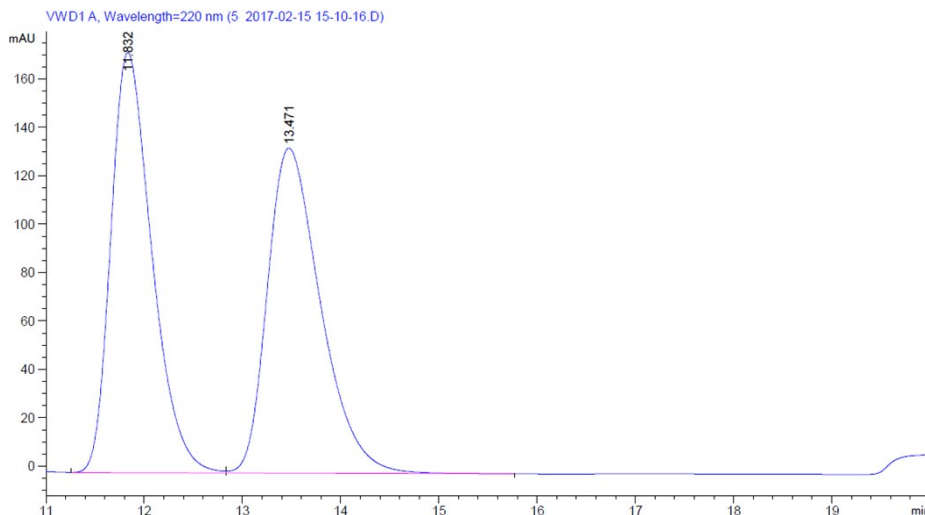

| Peak # | RetTime [min] | Type | Width [min] | Area [mAU*s] | Height [mAU] | Area %  |
|--------|---------------|------|-------------|--------------|--------------|---------|
| 1      | 11.832        | BV   | 0.4453      | 5032.97266   | 173.56529    | 49.9189 |
| 2      | 13.471        | VB   | 0.5756      | 5049.32813   | 134.31917    | 50.0811 |

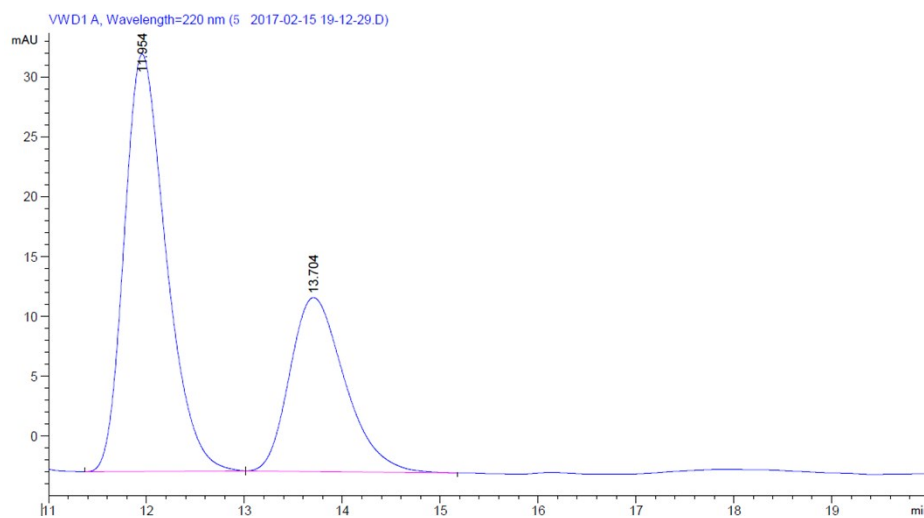

| Peak # | RetTime [min] | Type | Width [min] | Area [mAU*s] | Height [mAU] | Area %  |
|--------|---------------|------|-------------|--------------|--------------|---------|
| 1      | 11.954        | BB   | 0.4525      | 1036.36377   | 34.89234     | 64.6333 |
| 2      | 13.704        | BB   | 0.5979      | 567.08893    | 14.54519     | 35.3667 |

***N*-benzhydryl-1-phenylethan-1-amine (3b):**<sup>[2]</sup> 90% yield, 96% ee, clear oil, known compound.  $[\alpha]_D^{25} = -38.2^\circ$  ( $c = 0.3$ , MeOH).  $^1\text{H NMR}$  (500 MHz,  $\text{CDCl}_3$ )  $\delta$  7.40 (t,  $J = 7.3$  Hz, 6H), 7.32 (td,  $J = 11.9, 9.9, 7.1$  Hz, 8H), 7.25–7.21 (m, 1H), 4.70 (s, 1H), 3.76 (q,  $J = 6.7$  Hz, 1H), 1.43 (d,  $J = 6.7$  Hz, 3H). IR (KBr)  $\nu$ : 3457.6, 3063.2, 3026.4, 2966.5, 1452.0, 1116.5  $\text{cm}^{-1}$ . Enantiomeric excess was determined by  $^1\text{H NMR}$  using (*S*)-2-acetoxy-2-phenylacetic acid as shift reagent.

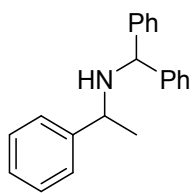

proton NMR for 3b ( $\text{CDCl}_3$ , 500MHz)

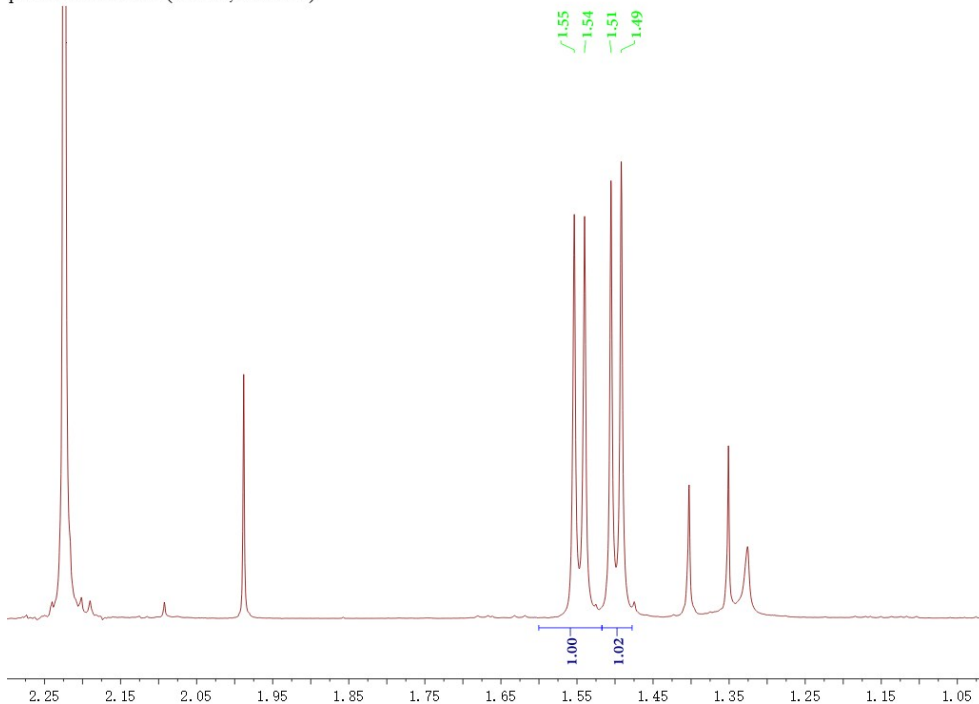

proton NMR for 3b ( $\text{CDCl}_3$  500MHz)

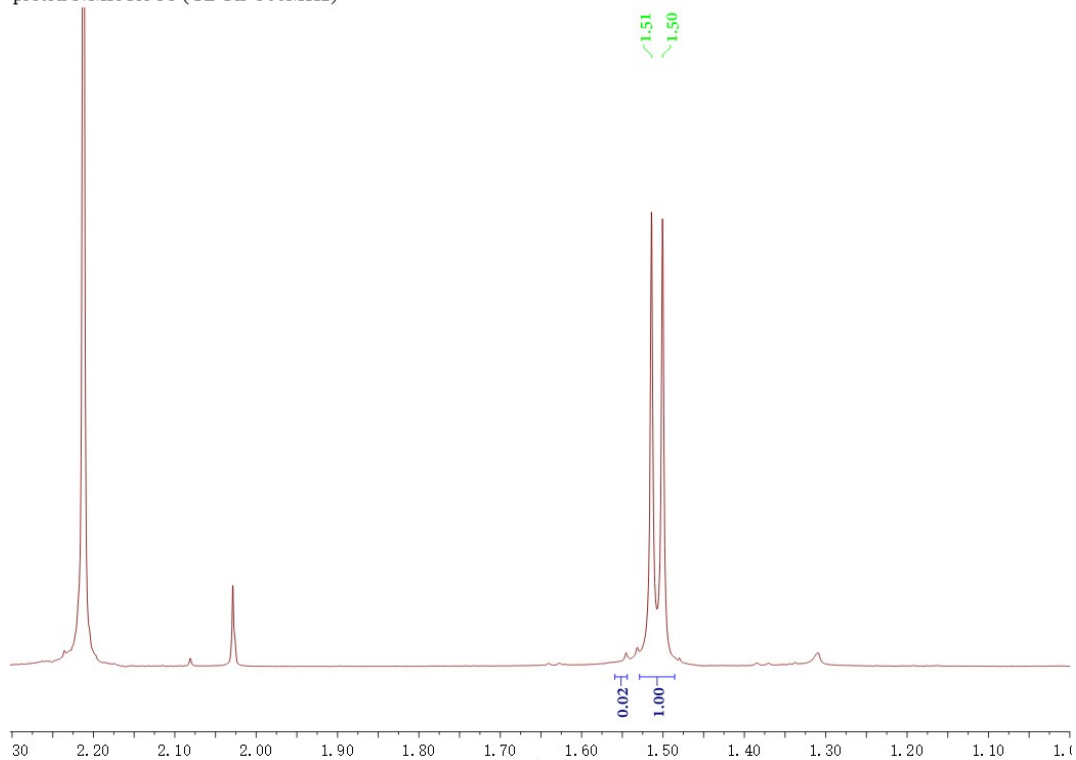

***N*-benzhydryl-1-(*p*-tolyl)ethan-1-amine (3c)**: 83% yield, 99% ee, clear oil, unknown compound.  $[\alpha]_D^{25} = -54.0^\circ$  ( $c = 0.4$ , MeOH).  $^1\text{H NMR}$  (500 MHz,  $\text{CDCl}_3$ )  $\delta$  7.39 (dt,  $J = 15.9, 7.4$  Hz, 6H), 7.31 (t,  $J = 7.6$  Hz, 3H), 7.22 (s, 5H), 4.72 (s, 1H), 3.74 (s, 1H), 2.43 (s, 3H), 1.42 (d,  $J = 6.7$  Hz, 3H);  $^{13}\text{C NMR}$  (125 MHz,  $\text{CDCl}_3$ )  $\delta$  144.7, 143.7, 142.6, 136.4, 129.2, 128.5, 128.4, 127.7, 127.4, 127.0, 126.8, 126.6, 63.7, 54.9, 24.5, 21.2. IR (KBr)  $\nu$ : 3436.1, 3022.6, 3026.4, 2966.5, 1450.8  $\text{cm}^{-1}$ . Enantiomeric excess was determined by  $^1\text{H NMR}$  using (*S*)-2-acetoxy-2-phenylacetic acid as shift reagent. HRMS calcd for  $\text{C}_{22}\text{H}_{22}\text{N}$   $[\text{M}+\text{H}]^+$ : 302.19033, found: 302.1904.

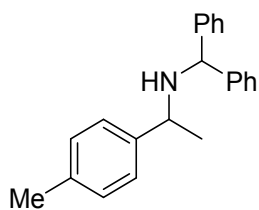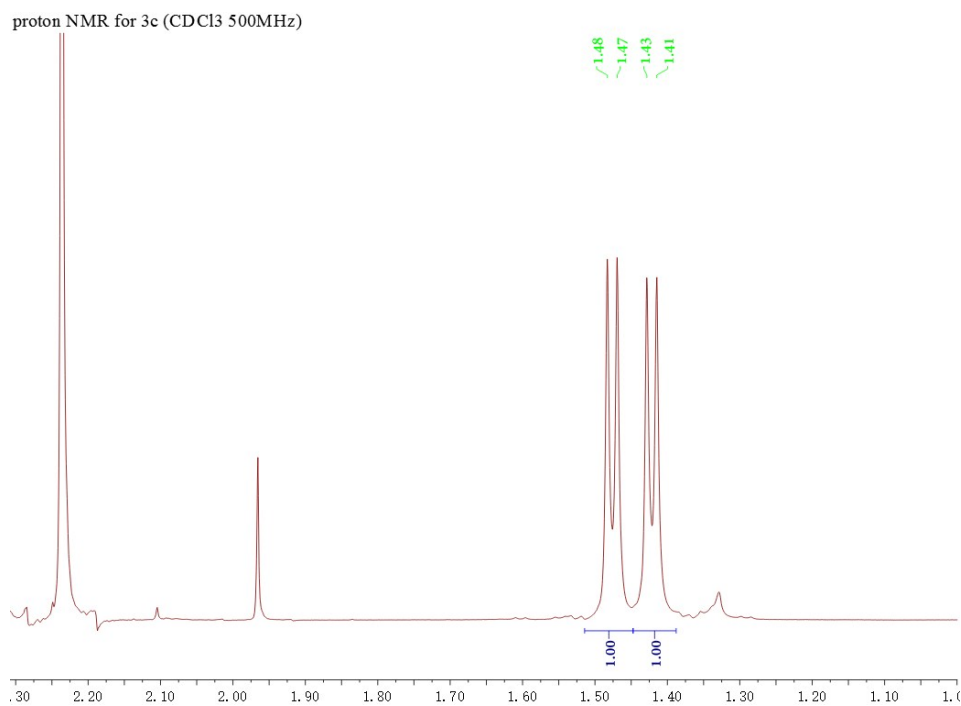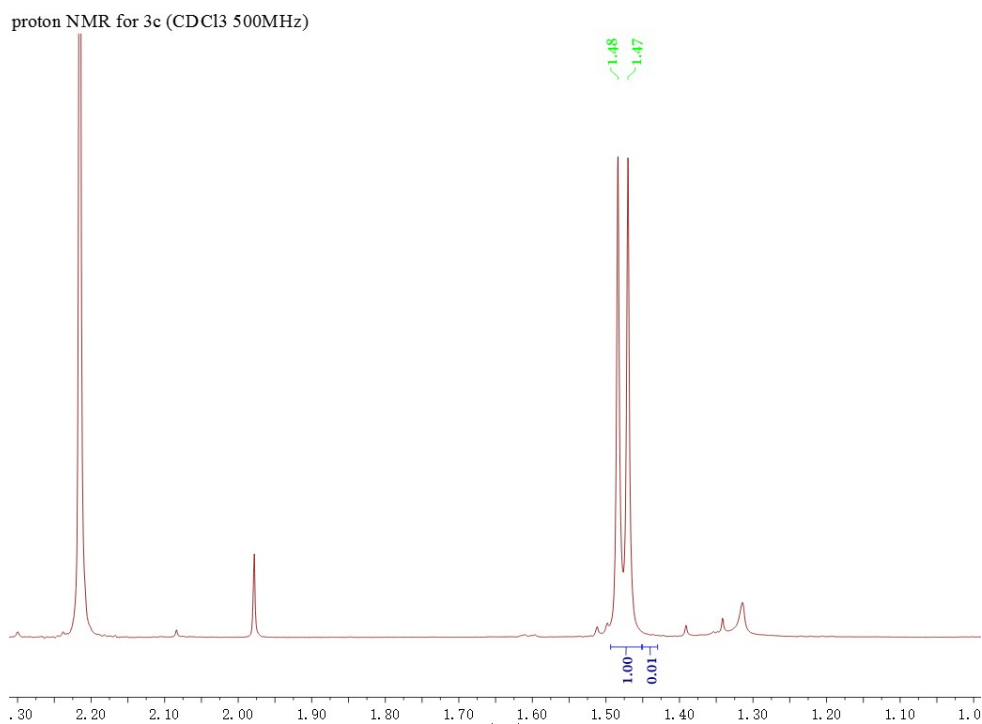

***N*-benzhydryl-1-(4-fluorophenyl)ethan-1-amine (3d)**: 89% yield, 98% ee, clear oil, unknown compound.  $[\alpha]_D^{25} = -33.0^\circ$  ( $c = 0.3$ , MeOH).  $^1\text{H NMR}$  (500 MHz,  $\text{CDCl}_3$ )  $\delta$  7.31 (m, 12H), 7.07 (t,  $J = 8.7$  Hz, 2H), 4.65 (s, 1H), 3.73 (q,  $J = 6.7$  Hz, 1H), 1.40 (d,  $J = 6.7$  Hz, 3H);  $^{13}\text{C NMR}$  (125 MHz,  $\text{CDCl}_3$ )  $\delta$  128.6, 128.4, 128.2, 128.2, 127.7, 127.4, 127.1, 127.0, 115.3, 115.2, 63.8, 54.6, 24.5. IR (KBr)  $\nu$ : 3441.4, 2967.2, 1641.6, 1491.4  $\text{cm}^{-1}$ . Enantiomeric excess was determined by chiral HPLC: Chiralpak OD-H column, Hex/IPA = 99.6:0.4, 0.9 mL/min, 220 nm, 12.0 min, 13.3 min. HRMS calcd for  $\text{C}_{21}\text{H}_{21}\text{FN}$   $[\text{M}+\text{H}]^+$ : 306.16525, found: 306.16516.

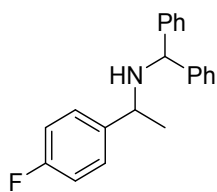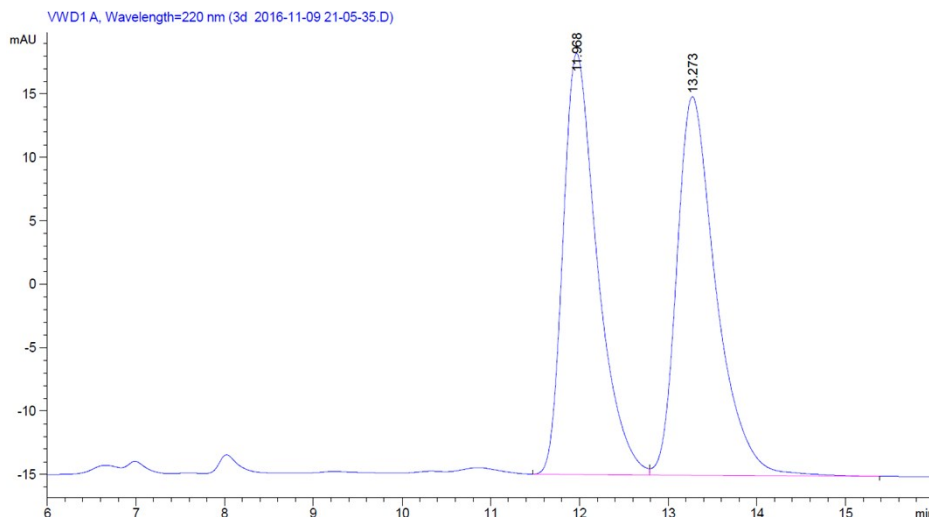

| Peak # | RetTime [min] | Type | Width [min] | Area [mAU*s] | Height [mAU] | Area %  |
|--------|---------------|------|-------------|--------------|--------------|---------|
| 1      | 11.968        | BV   | 0.4045      | 892.36261    | 33.21243     | 49.3041 |
| 2      | 13.273        | VB   | 0.4606      | 917.55286    | 29.84810     | 50.6959 |

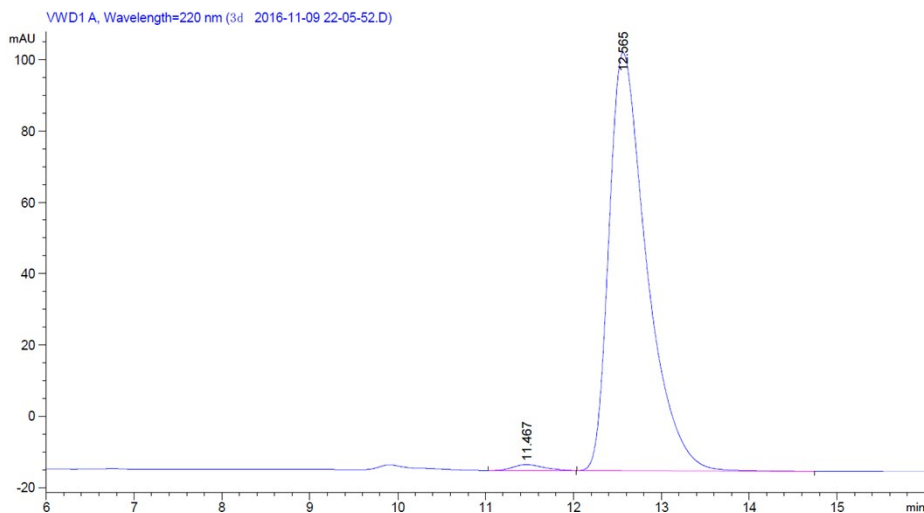

| Peak # | RetTime [min] | Type | Width [min] | Area [mAU*s] | Height [mAU] | Area %  |
|--------|---------------|------|-------------|--------------|--------------|---------|
| 1      | 11.467        | MM   | 0.4120      | 41.96301     | 1.69744      | 1.1905  |
| 2      | 12.565        | BB   | 0.4466      | 3482.93506   | 117.24285    | 98.8095 |



***N*-benzhydryl-1-(4-chlorophenyl)ethan-1-amine (3e)**: 87% yield, 97% ee, clear oil, unknown compound.  $[\alpha]_D^{25} = -63.0^\circ$  ( $c = 0.3$ , MeOH).  $^1\text{H NMR}$  (500 MHz,  $\text{CDCl}_3$ )  $\delta$  7.36 (dd,  $J = 10.7, 7.5$  Hz, 6H), 7.33–7.27 (m, 5H), 7.25 (d,  $J = 8.4$  Hz, 3H), 4.64 (s, 1H), 3.71 (q,  $J = 6.7$  Hz, 1H), 1.39 (d,  $J = 6.6$  Hz, 3H);  $^{13}\text{C NMR}$  (125 MHz,  $\text{CDCl}_3$ )  $\delta$  144.4, 144.1, 143.4, 132.4, 128.6, 128.5, 128.4, 128.1, 127.6, 127.3, 127.1, 127.0, 63.8, 54.6, 24.4. IR (KBr)  $\nu$ : 3463.7, 3061.3, 3026.9, 2969.2, 1488.2, 828.2  $\text{cm}^{-1}$ . Enantiomeric excess was determined by chiral HPLC: Chiralpak OD-H column, Hex/IPA = 99.5:0.5, 0.9 mL/min, 220 nm, 6.2min, 6.8 min. HRMS calcd for  $\text{C}_{21}\text{H}_{21}\text{ClN}$   $[\text{M}+\text{H}]^+$ : 322.13570, found: 322.13556.

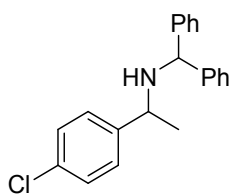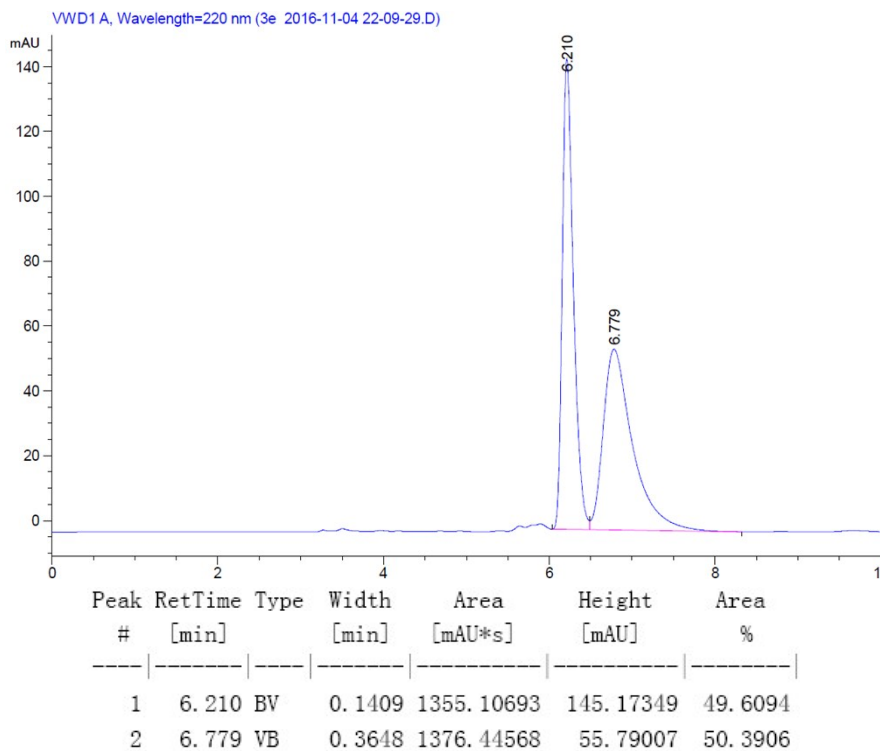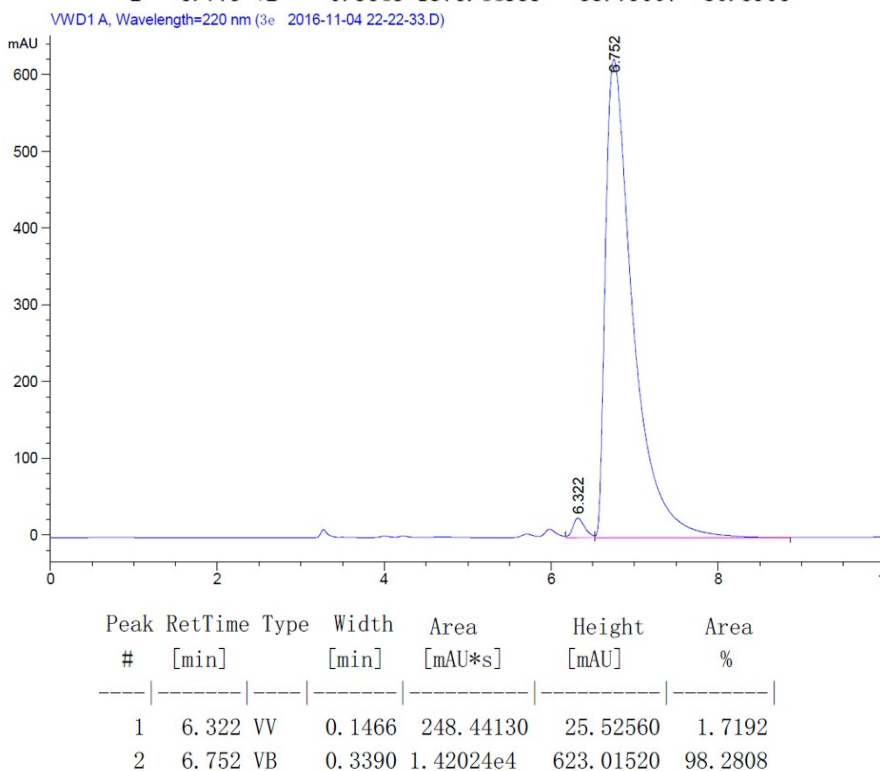

***N*-benzhydryl-1-(4-bromophenyl)ethan-1-amine (3f)**: 80% yield, 98% ee, clear oil, unknown compound.  $[\alpha]_D^{25} = -66.9^\circ$  ( $c = 0.3$ , MeOH).  $^1\text{H NMR}$  (500 MHz,  $\text{CDCl}_3$ )  $\delta$  7.51 (d,  $J = 8.3$  Hz, 2H), 7.41–7.28 (m, 9H), 7.24 (t,  $J = 6.8$  Hz, 1H), 7.20 (d,  $J = 8.3$  Hz, 2H), 4.65 (s, 1H), 3.71 (q,  $J = 6.6$  Hz, 1H), 1.40 (d,  $J = 6.7$  Hz, 3H);  $^{13}\text{C NMR}$  (125 MHz,  $\text{CDCl}_3$ )  $\delta$  144.7, 144.4, 143.4, 131.6, 128.6, 128.5, 128.4, 127.6, 127.3, 127.1, 127.0, 120.5, 63.8, 54.7, 24.4. IR (KBr)  $\nu$ : 3446.6, 2967.6, 1640.5, 1016.9  $\text{cm}^{-1}$ . Enantiomeric excess was determined by chiral HPLC: Chiralpak OD-H column, Hex/IPA = 98:2, 1 mL/min, 220 nm, 4.4 min, 4.8 min. HRMS calcd for  $\text{C}_{21}\text{H}_{21}\text{BrN}$   $[\text{M}+\text{H}]^+$ : 366.08519, found: 366.08524.

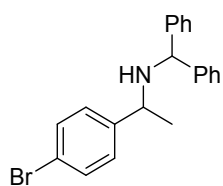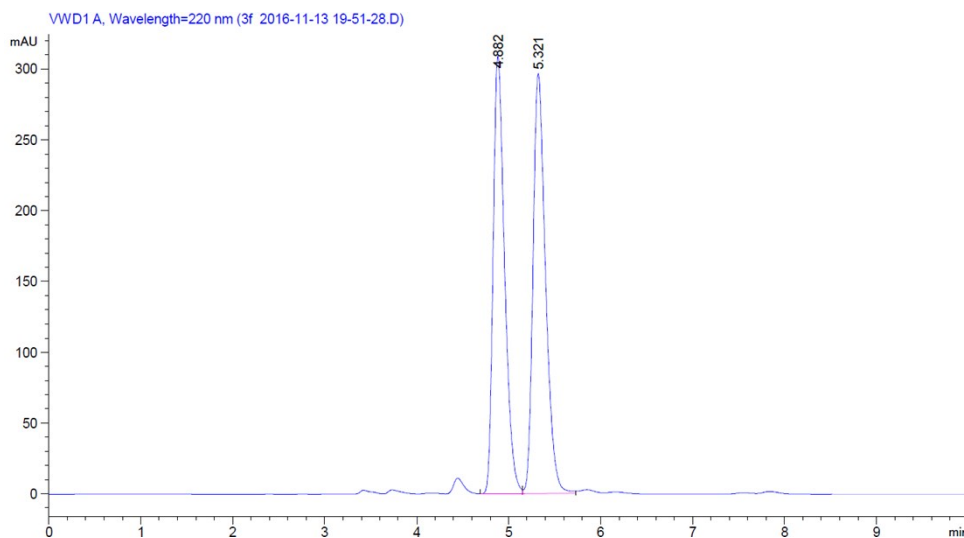

| Peak # | RetTime [min] | Type | Width [min] | Area [mAU*s] | Height [mAU] | Area %  |
|--------|---------------|------|-------------|--------------|--------------|---------|
| 1      | 4.415         | BV   | 0.1212      | 1645.57019   | 206.03586    | 48.9521 |
| 2      | 4.808         | VV   | 0.1328      | 1716.01917   | 196.65742    | 51.0479 |

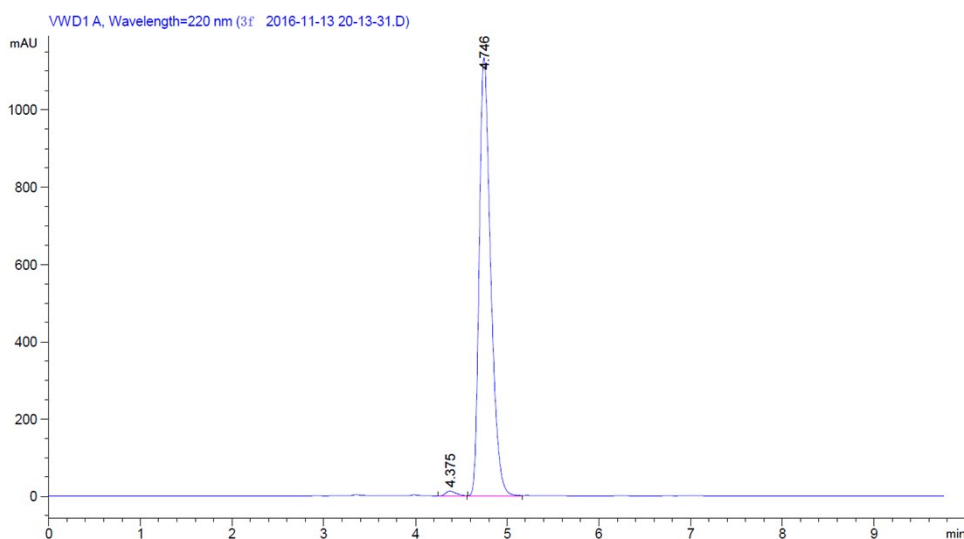

| Peak # | RetTime [min] | Type | Width [min] | Area [mAU*s] | Height [mAU] | Area %  |
|--------|---------------|------|-------------|--------------|--------------|---------|
| 1      | 4.375         | BV   | 0.1226      | 100.61216    | 12.41213     | 1.0107  |
| 2      | 4.746         | VV   | 0.1324      | 9853.84180   | 1133.45203   | 98.9893 |

***N*-benzhydryl-1-(4-(trifluoromethyl)phenyl)ethan-1-amine (3g)**: 93% yield, 97% ee, white solid, unknown compound. Mp: 52–54°C.  $[\alpha]^{25}_D = -46.3^\circ$  ( $c = 0.3$ , MeOH).  $^1\text{H NMR}$  (500 MHz,  $\text{CDCl}_3$ )  $\delta$  7.65 (d,  $J = 8.1$  Hz, 2H), 7.44 (d,  $J = 8.0$  Hz, 2H), 7.42–7.28 (m, 9H), 7.25 (t,  $J = 7.0$  Hz, 1H), 4.65 (s, 1H), 3.81 (q,  $J = 6.6$  Hz, 1H), 1.43 (d,  $J = 6.7$  Hz, 3H);  $^{13}\text{C NMR}$  (125 MHz,  $\text{CDCl}_3$ )  $\delta$  149.8, 144.2, 143.3, 128.6, 128.4, 127.6, 127.3, 127.1, 127.1, 127.0, 125.5, 125.5, 63.9, 54.9, 24.4. IR (KBr)  $\nu$ : 3349.3, 3061.13028.4, 2973.5, 1323.4, 1123.9  $\text{cm}^{-1}$ . Enantiomeric excess was determined by chiral HPLC: Chiralpak IB-3 column, Hex/IPA = 99.5:0.5, 1 mL/min, 220 nm, 6.028 min, 6.689 min. HRMS calcd for  $\text{C}_{22}\text{H}_{21}\text{F}_3\text{N}$   $[\text{M}+\text{H}]^+$ : 356.16206, found: 356.16208.

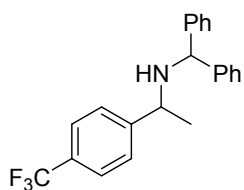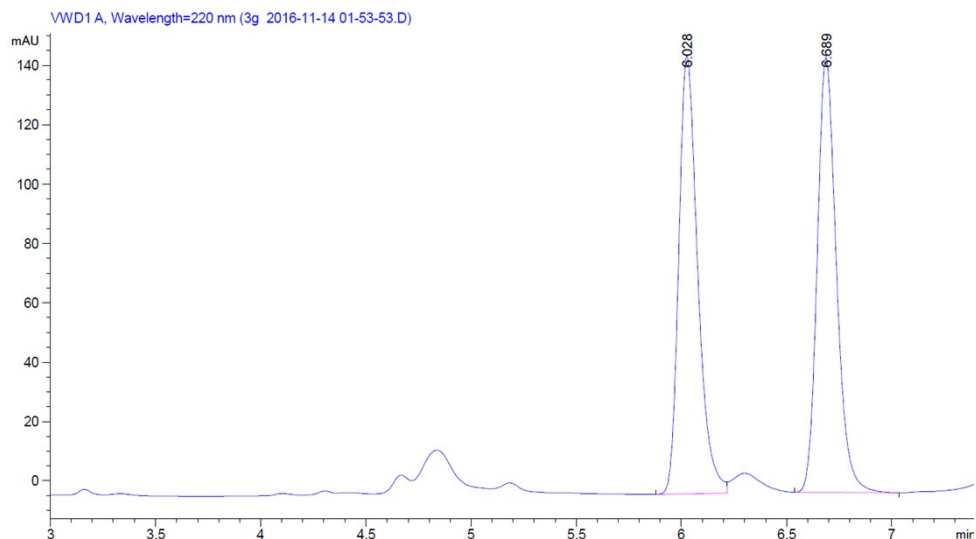

| Peak # | RetTime [min] | Type | Width [min] | Area [mAU*s] | Height [mAU] | Area %  |
|--------|---------------|------|-------------|--------------|--------------|---------|
| 1      | 6.028         | BV   | 0.0961      | 925.52386    | 147.74202    | 49.8903 |
| 2      | 6.689         | BB   | 0.0970      | 929.59540    | 146.64767    | 50.1097 |

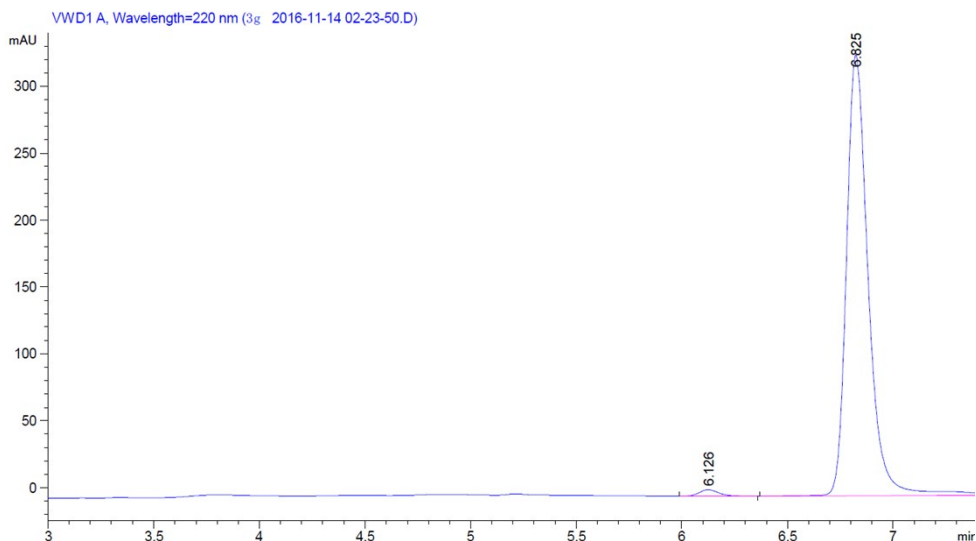

| Peak # | RetTime [min] | Type | Width [min] | Area [mAU*s] | Height [mAU] | Area %  |
|--------|---------------|------|-------------|--------------|--------------|---------|
| 1      | 6.126         | BB   | 0.0988      | 30.86707     | 4.81507      | 1.2795  |
| 2      | 6.825         | BB   | 0.1093      | 2381.49219   | 329.55951    | 98.7205 |

***N*-benzhydryl-1-(4-nitrophenyl)ethan-1-amine (3h)**: 86% yield, 95% ee, white solid, unknown compound. Mp: 107–110°C.

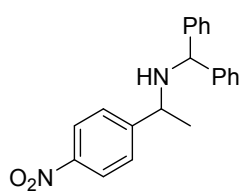

$[\alpha]_D^{25} = -79.4^\circ$  ( $c = 0.3$ , MeOH).  $^1\text{H NMR}$  (500 MHz,  $\text{CDCl}_3$ )  $\delta$  8.24 (d,  $J = 8.6$  Hz, 2H), 7.50 (d,  $J = 8.6$  Hz, 2H), 7.39 (t,  $J = 7.5$  Hz, 2H), 7.36–7.28 (m, 7H), 7.24 (t,  $J = 6.8$  Hz, 1H), 4.62 (s, 1H), 3.87 (q,  $J = 6.6$  Hz, 1H), 1.44 (d,  $J = 6.7$  Hz, 3H).  $^{13}\text{C NMR}$  (125 MHz,  $\text{CDCl}_3$ )  $\delta$  143.1, 128.7, 128.4, 127.6, 127.5, 127.3, 127.1, 123.9, 64.1, 55.0, 24.3. IR (KBr)  $\nu$ : 3423.8, 3061.5, 3022.3, 2960.3, 1509.2, 1337.0  $\text{cm}^{-1}$ . Enantiomeric excess was determined by chiral HPLC: Chiralpak OD-H column, Hex/IPA = 94:6, 0.9 mL/min, 220 nm, 9.8 min, 12.0 min. HRMS calcd for  $\text{C}_{21}\text{H}_{21}\text{N}_2\text{O}_2$   $[\text{M}+\text{H}]^+$ : 333.15975, found: 333.15964.

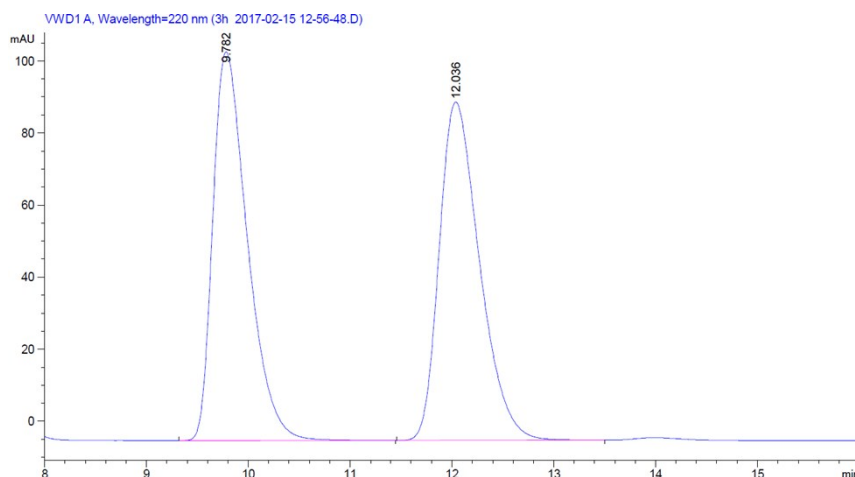

| Peak # | RetTime [min] | Type | Width [min] | Area [mAU*s] | Height [mAU] | Area %  |
|--------|---------------|------|-------------|--------------|--------------|---------|
| 1      | 9.782         | BB   | 0.3596      | 2538.47192   | 107.86262    | 49.5975 |
| 2      | 12.036        | BB   | 0.4216      | 2579.66870   | 93.88465     | 50.4025 |

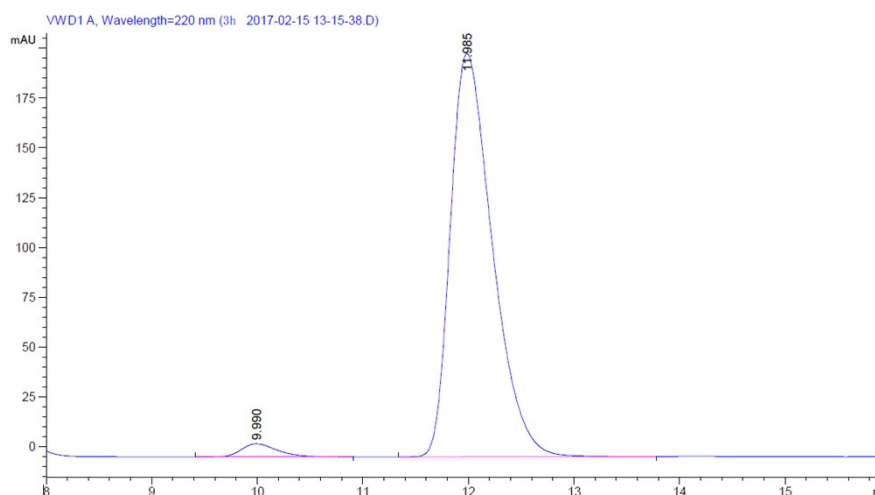

| Peak # | RetTime [min] | Type | Width [min] | Area [mAU*s] | Height [mAU] | Area %  |
|--------|---------------|------|-------------|--------------|--------------|---------|
| 1      | 9.990         | BB   | 0.3579      | 153.80548    | 6.57567      | 2.6763  |
| 2      | 11.985        | BB   | 0.4241      | 5593.15625   | 202.60150    | 97.3237 |

**Methyl 4-(1-(benzhydrylamino)ethyl)benzoate (3i):** 90% yield, 95% ee, white solid, unknown compound. Mp: 58–60°C.

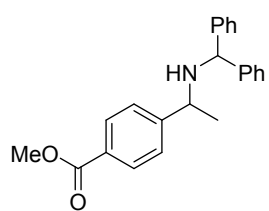

$[\alpha]_D^{25} = -75.1^\circ$  ( $c = 0.3$ , MeOH).  $^1\text{H NMR}$  (500 MHz,  $\text{CDCl}_3$ )  $\delta$  8.07 (d,  $J = 7.9$  Hz, 2H), 7.37 (q,  $J = 8.4, 7.5$  Hz, 6H), 7.33–7.27 (m, 5H), 7.23 (t,  $J = 6.4$  Hz, 1H), 4.63 (s, 1H), 3.97 (s, 3H), 3.80 (q,  $J = 6.6$  Hz, 1H), 1.43 (d,  $J = 6.6$  Hz, 3H).  $^{13}\text{C NMR}$  (125 MHz,  $\text{CDCl}_3$ )  $\delta$  151.1, 144.3, 143.3, 129.9, 128.9, 128.6, 128.4, 127.6, 127.3, 127.1, 127.0, 126.8, 63.9, 55.1, 52.1, 24.3. IR (KBr)  $\nu$ : 3403.1, 3318.1, 3025.2, 2959.7, 2924.2, 1711.0, 1277.9  $\text{cm}^{-1}$ . Enantiomeric excess was determined by chiral HPLC: Chiralpak OD-H column, Hex/IPA = 70:30, 1 mL/min, 220 nm, 4.5 min, 11.1 min.

HRMS calcd for  $\text{C}_{23}\text{H}_{24}\text{NO}_2$   $[\text{M}+\text{H}]^+$ : 346.18016, found: 346.18027.

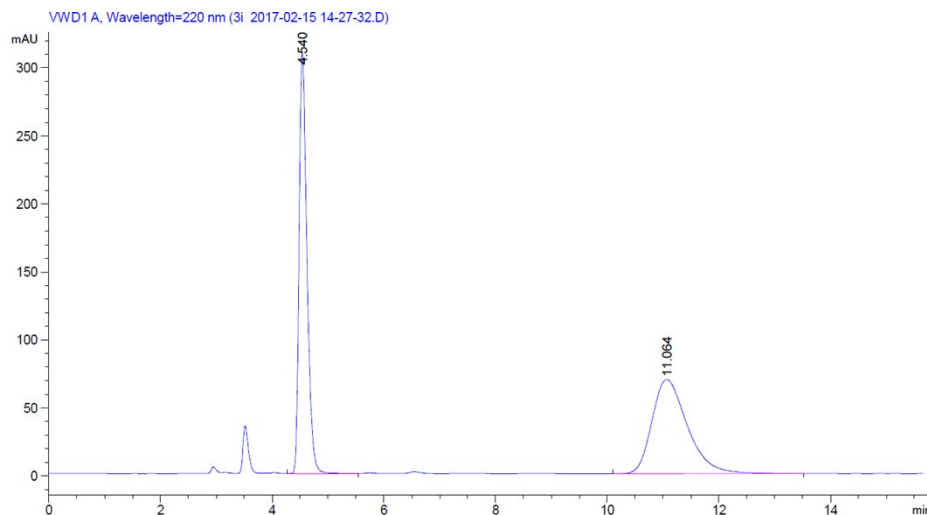

| Peak # | RetTime [min] | Type | Width [min] | Area [mAU*s] | Height [mAU] | Area %  |
|--------|---------------|------|-------------|--------------|--------------|---------|
| 1      | 4.540         | BB   | 0.1488      | 3013.90723   | 309.05890    | 49.7491 |
| 2      | 11.064        | BB   | 0.6726      | 3044.30200   | 69.15044     | 50.2509 |

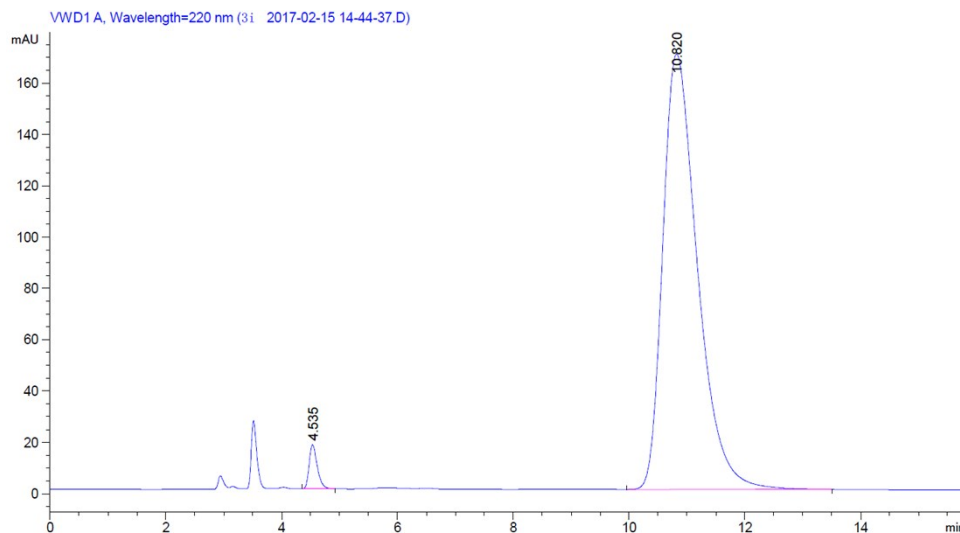

| Peak # | RetTime [min] | Type | Width [min] | Area [mAU*s] | Height [mAU] | Area %  |
|--------|---------------|------|-------------|--------------|--------------|---------|
| 1      | 4.535         | BB   | 0.1484      | 167.06003    | 17.19346     | 2.3162  |
| 2      | 10.820        | BB   | 0.6342      | 7045.52344   | 169.75066    | 97.6838 |

***N*-4-(1-(benzhydrylamino)ethyl)phenylacetamide (3j)**: 91% yield, 92% ee, white solid, unknown compound. Mp: 92–96°C.  $[\alpha]_D^{25} = -68.2^\circ$  ( $c = 0.3$ , MeOH).  $^1\text{H NMR}$  (500 MHz,  $\text{CDCl}_3$ )  $\delta$  7.51 (s, 2H), 7.37 (d,  $J = 4.1$  Hz, 4H), 7.33–7.21 (m, 8H), 4.66 (s, 1H), 3.70 (q,  $J = 6.6$  Hz, 1H), 2.22 (s, 3H), 1.39 (d,  $J = 6.7$  Hz, 3H).  $^{13}\text{C NMR}$  (125 MHz,  $\text{CDCl}_3$ )  $\delta$  168.4, 144.6, 141.6, 136.6, 128.5, 128.4, 127.7, 127.4, 127.3, 127.0, 126.9, 120.1, 63.7, 54.7, 24.6, 24.4. IR (KBr)  $\nu$ : 3294.3, 3190.6, 3061.9, 3029.1, 2963.2, 1662.6, 1542.1  $\text{cm}^{-1}$ . Enantiomeric excess was determined by chiral HPLC: Chiralpak OD-H column, Hex/IPA = 90:10, 1 mL/min, 220 nm, 11.5 min, 13.3 min. HRMS calcd for  $\text{C}_{23}\text{H}_{25}\text{N}_2\text{O}$   $[\text{M}+\text{H}]^+$ : 345.19614, found: 345.19614.

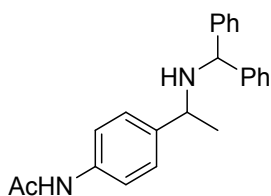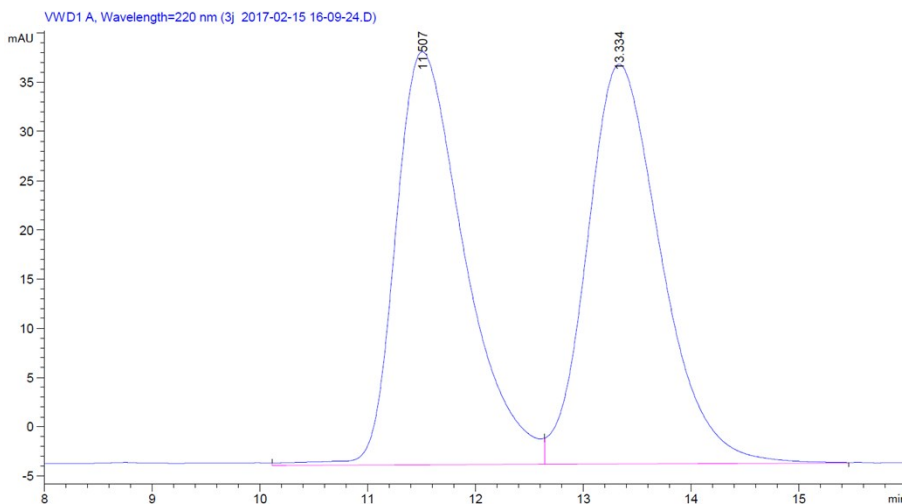

| Peak # | RetTime [min] | Type | Width [min] | Area [mAU*s] | Height [mAU] | Area %  |
|--------|---------------|------|-------------|--------------|--------------|---------|
| 1      | 11.507        | MF   | 0.7410      | 1866.31555   | 41.97757     | 49.0664 |
| 2      | 13.334        | FM   | 0.7947      | 1937.33923   | 40.63288     | 50.9336 |

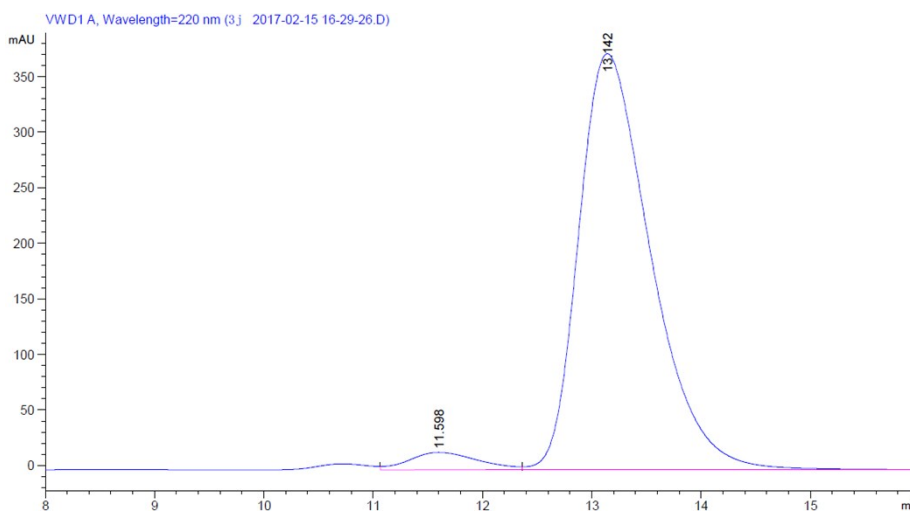

| Peak # | RetTime [min] | Type | Width [min] | Area [mAU*s] | Height [mAU] | Area %  |
|--------|---------------|------|-------------|--------------|--------------|---------|
| 1      | 11.598        | VV   | 0.6670      | 686.02032    | 15.66234     | 3.8300  |
| 2      | 13.142        | VB   | 0.7067      | 1.71253e4    | 374.37674    | 95.6099 |

**4-(1-(benzhydrylamino)ethyl)phenyl acetate (3k)**: 90% yield, 98% ee, clear oil, unknown compound.  $[\alpha]_D^{25} = -54.1^\circ$  ( $c = 0.3$ , MeOH).  $^1\text{H NMR}$  (500 MHz,  $\text{CDCl}_3$ )  $\delta$  7.38 (d,  $J = 4.4$  Hz, 4H), 7.32 (dd,  $J = 13.7, 8.1$  Hz, 7H), 7.24 (t,  $J = 6.3$  Hz, 1H), 7.11 (d,  $J = 8.5$  Hz, 2H), 4.70 (s, 1H), 3.75 (q,  $J = 6.6$  Hz, 1H), 2.36 (s, 3H), 1.41 (d,  $J = 6.7$  Hz, 3H).  $^{13}\text{C NMR}$  (125 MHz,  $\text{CDCl}_3$ )  $\delta$  149.5, 144.5, 143.6, 143.1, 128.5, 128.4, 127.7, 127.7, 127.4, 127.0, 126.9, 121.5, 63.7, 54.6, 24.5, 21.2. IR (KBr)  $\nu$ : 3425.6, 1712.0, 1200.2  $\text{cm}^{-1}$ . Enantiomeric excess was determined by chiral HPLC: Chiralpak OD-H column, Hex/IPA=80:20, 1 mL/min, 220 nm, 4.5 min, 6.0 min. HRMS calcd for  $\text{C}_{23}\text{H}_{24}\text{NO}_2$   $[\text{M}+\text{H}]^+$ : 346.18016, found: 346.18015.

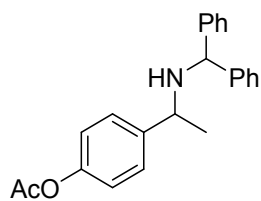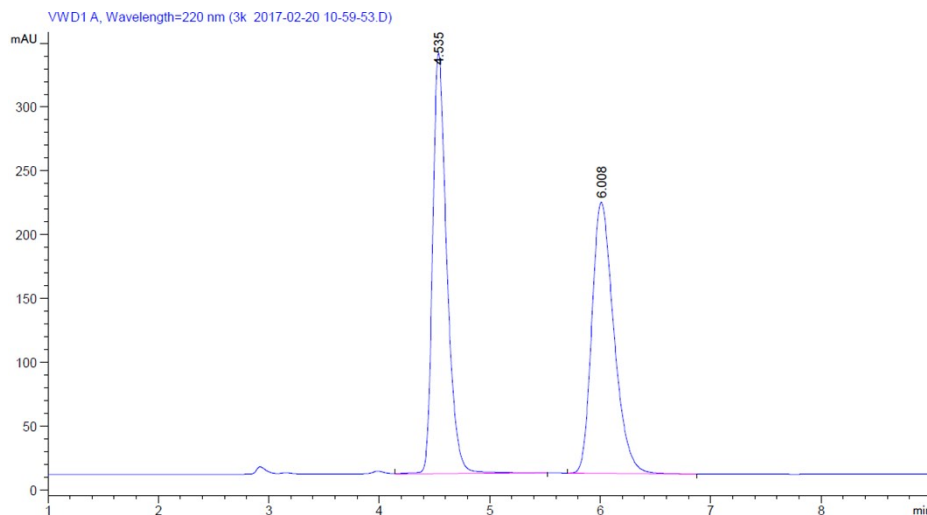

| Peak # | RetTime [min] | Type | Width [min] | Area [mAU*s] | Height [mAU] | Area %  |
|--------|---------------|------|-------------|--------------|--------------|---------|
| 1      | 4.535         | VB   | 0.1354      | 2944.76855   | 329.13275    | 50.0836 |
| 2      | 6.008         | BB   | 0.2113      | 2934.94189   | 212.30090    | 49.9164 |

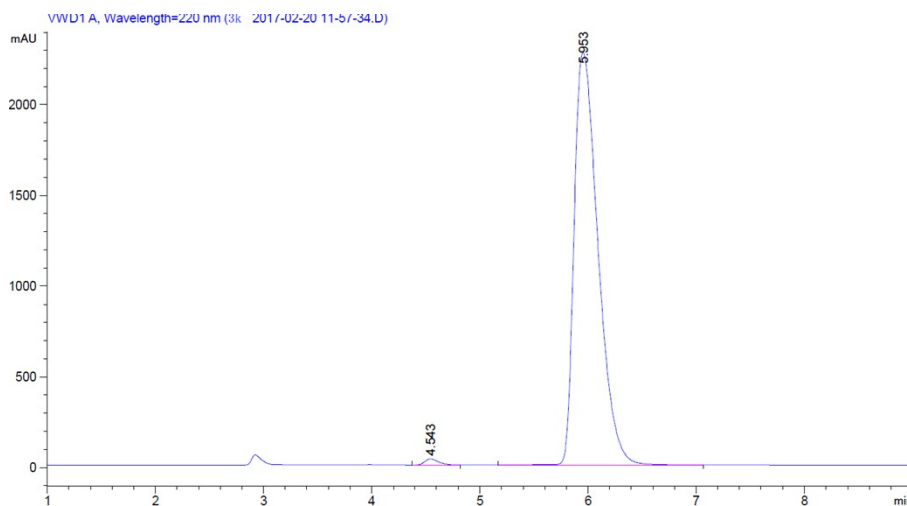

| Peak # | RetTime [min] | Type | Width [min] | Area [mAU*s] | Height [mAU] | Area %  |
|--------|---------------|------|-------------|--------------|--------------|---------|
| 1      | 4.543         | BV   | 0.1348      | 306.52612    | 34.11092     | 0.8720  |
| 2      | 5.953         | VB   | 0.2377      | 3.48470e4    | 2275.32520   | 99.1280 |

***N*-benzhydryl-1-(3-methoxyphenyl)ethan-1-amine (3i)**: 83% yield, 98% ee, clear oil, known compound.  $[\alpha]_D^{25} = -42^\circ$  ( $c = 0.3$ , MeOH).  $^1\text{H NMR}$  (500 MHz,  $\text{CDCl}_3$ )  $\delta$  7.42–7.33 (m, 6H), 7.29 (s, 4H), 7.22 (d,  $J = 7.2$  Hz, 1H), 6.97–6.78 (m, 3H), 4.71 (s, 1H), 3.85 (s, 3H), 3.72 (q,  $J = 6.6$  Hz, 1H), 1.42 (d,  $J = 6.7$  Hz, 3H).  $^{13}\text{C NMR}$  (125 MHz,  $\text{CDCl}_3$ )  $\delta$  159.8, 147.4, 144.7, 143.7, 129.5, 128.5, 128.4, 127.7, 127.4, 127.0, 126.9, 119.1, 112.4, 112.2, 63.8, 55.3, 55.2, 24.4. IR (KBr)  $\nu$ : 3350.4, 3025.5, 2963.0, 2837.4, 1596.0, 1453.0, 1264.4  $\text{cm}^{-1}$ . Enantiomeric excess was determined by  $^1\text{H NMR}$  using (S)-2-acetoxy-2-phenylacetic acid as shift reagent. HRMS calcd for  $\text{C}_{22}\text{H}_{24}\text{NO}$   $[\text{M}+\text{H}]^+$ : 318.18524, found: 318.18502.

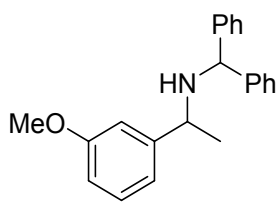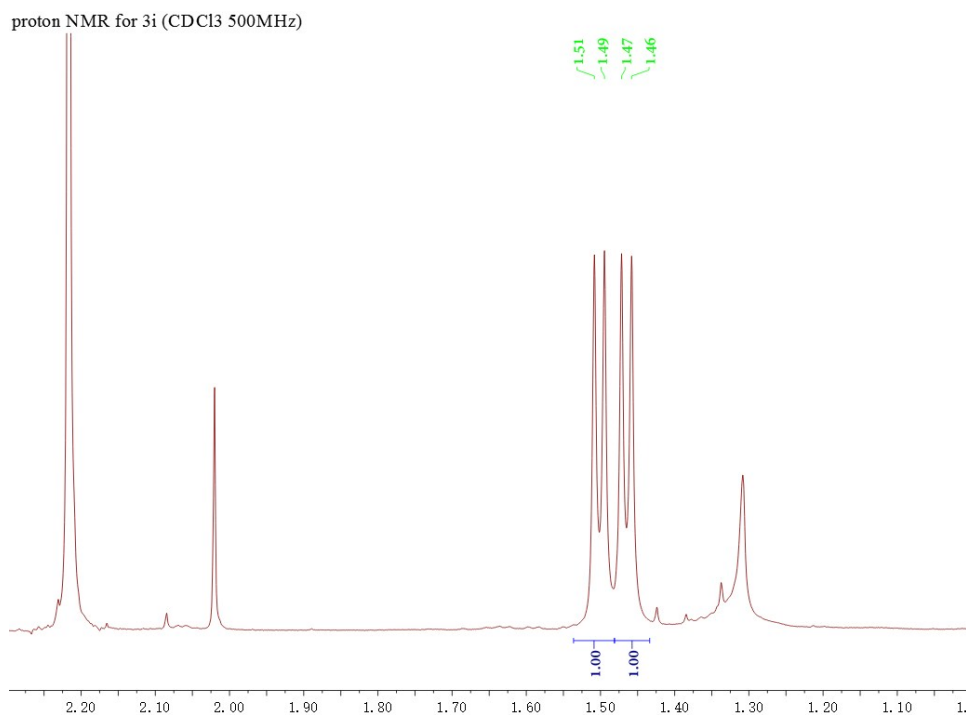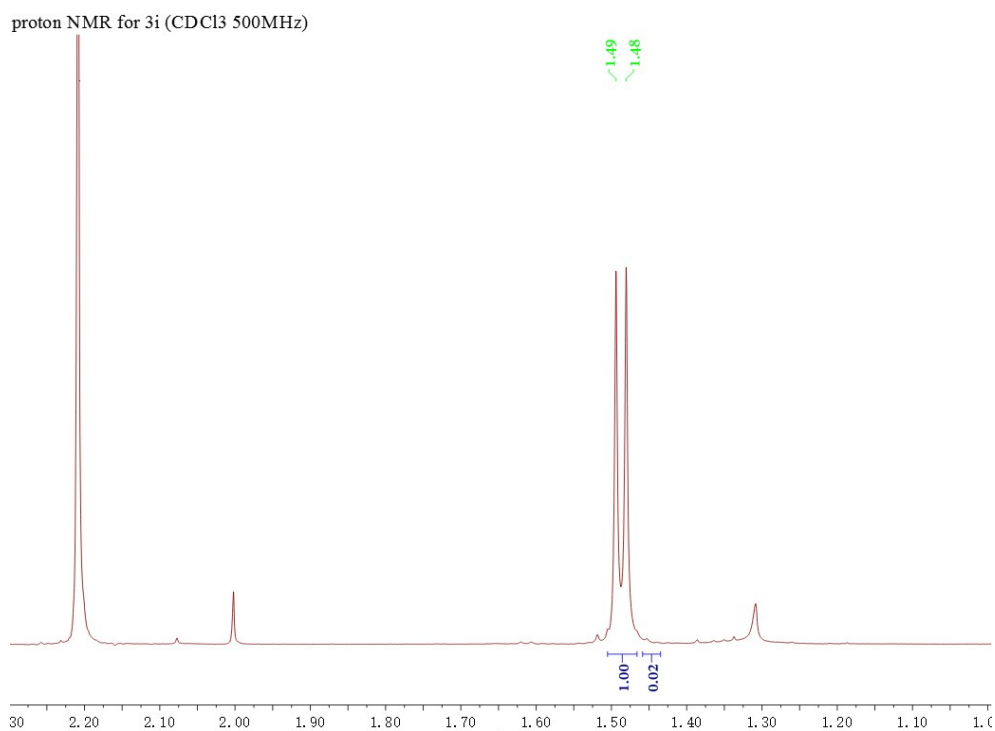



***N*-benzhydryl-1-(3-chlorophenyl)ethan-1-amine (3m)**: 88% yield, 97% ee, clear oil, unknown compound.  $[\alpha]_{D}^{25} = -48.7^{\circ}$  ( $c = 0.3$ , MeOH).  $^1\text{H NMR}$  (500 MHz,  $\text{CDCl}_3$ )  $\delta$  7.39 (d,  $J = 6.1$  Hz, 4H), 7.37–7.27 (m, 8H), 7.25 (t,  $J = 7.0$  Hz, 1H), 7.19 (d,  $J = 6.9$  Hz, 1H), 4.69 (s, 1H), 3.72 (q,  $J = 6.5$  Hz, 1H), 1.41 (d,  $J = 6.7$  Hz, 3H);  $^{13}\text{C NMR}$  (125 MHz,  $\text{CDCl}_3$ )  $\delta$  147.9, 144.3, 143.5, 134.4, 129.8, 128.6, 128.4, 127.6, 127.4, 127.1, 127.0, 126.9, 124.9, 63.9, 54.9, 24.4. IR (KBr)  $\nu$ : 3450.5, 3046.3, 3027.5, 2969.0, 1636.8, 1455.8  $\text{cm}^{-1}$ . Enantiomeric excess was determined by chiral HPLC: Chiralpak OD-H column, Hex/IPA = 99.5:0.5, 0.9 mL/min, 220 nm, 6.1 min, 7.0 min. HRMS calcd for  $\text{C}_{21}\text{H}_{21}\text{ClN}$   $[\text{M}+\text{H}]^+$ : 322.13570, found: 322.13580.

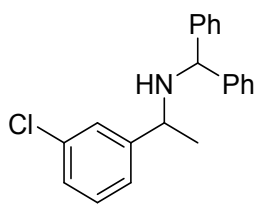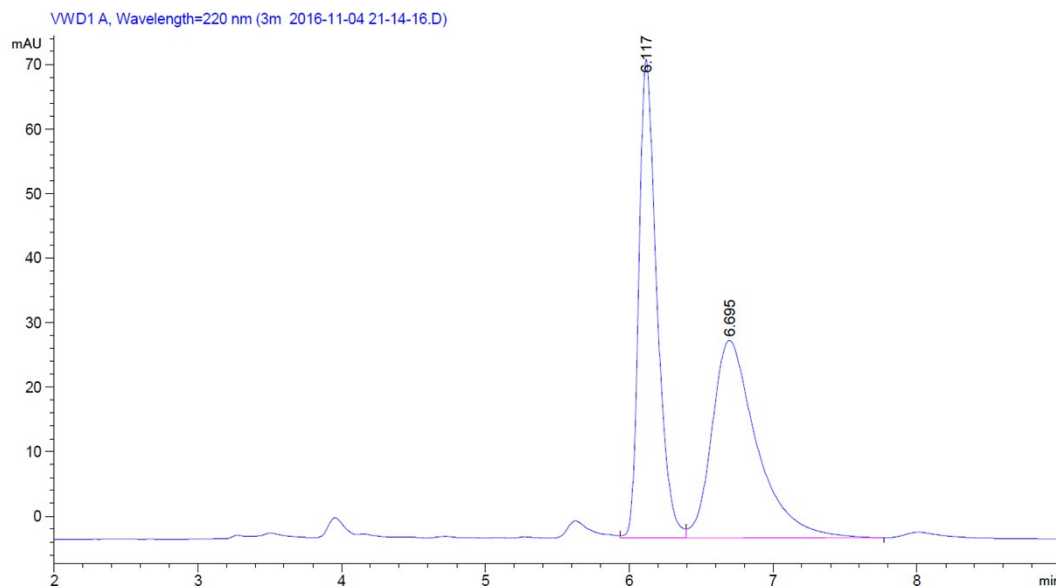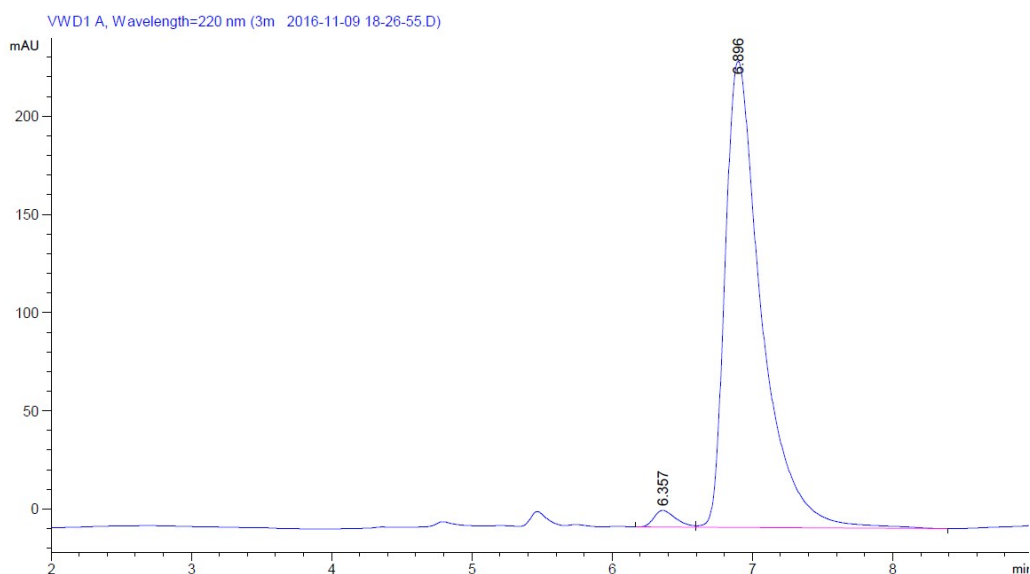

***N*-benzhydryl-1-(3-(trifluoromethyl)phenyl)ethan-1-amine (3n)**: 87% yield, 96% ee, clear oil, unknown compound.  $[\alpha]_D^{25} = -34.7^\circ$  ( $c = 0.3$ , MeOH).  $^1\text{H NMR}$  (500 MHz,  $\text{CDCl}_3$ )  $\delta$  7.58 (s, 2H), 7.51 (q,  $J = 8.7, 7.5$  Hz, 2H), 7.43–7.29 (m, 9H), 7.24 (t,  $J = 6.9$  Hz, 1H), 4.65 (s, 1H), 3.83 (q,  $J = 6.5$  Hz, 1H), 1.44 (d,  $J = 6.7$  Hz, 3H);  $^{13}\text{C NMR}$  (125 MHz,  $\text{CDCl}_3$ )  $\delta$  130.2, 128.9, 128.6, 128.4, 127.6, 127.4, 127.2, 127.0, 123.8, 123.7, 64.0, 55.1, 24.3. IR (KBr)  $\nu$ : 3457.2, 3027.1, 2968.7, 1450.7, 1327.5, 1166.9  $\text{cm}^{-1}$ . Enantiomeric excess was determined by chiral HPLC: Chiralpak OD-H column, Hex/IPA = 99.4:0.6, 0.9 mL/min, 220 nm, 12.0 min, 14.9 min. HRMS calcd for  $\text{C}_{22}\text{H}_{21}\text{F}_3\text{N}$   $[\text{M}+\text{H}]^+$ : 356.16206, found: 356.16193.

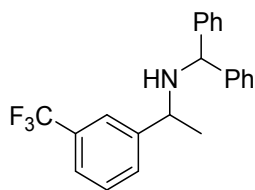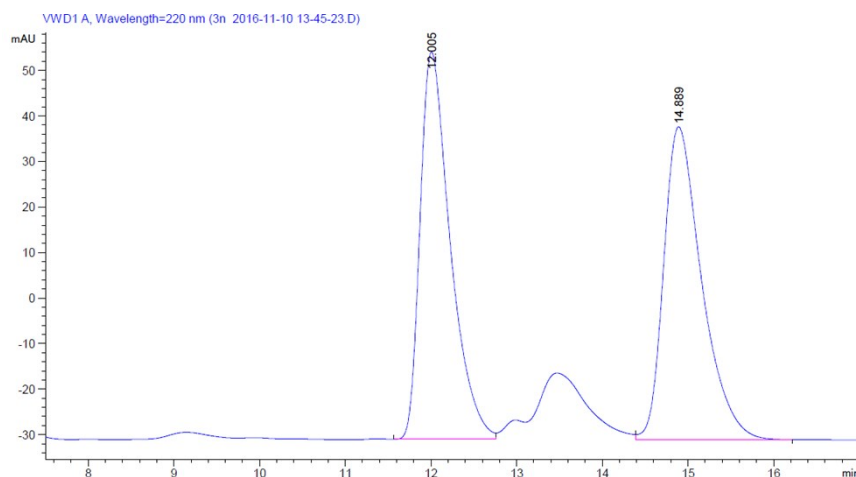

| Peak # | RetTime [min] | Type | Width [min] | Area [mAU*s] | Height [mAU] | Area %  |
|--------|---------------|------|-------------|--------------|--------------|---------|
| 1      | 12.005        | BV   | 0.3682      | 2079.99146   | 85.08228     | 49.6038 |
| 2      | 14.889        | VB   | 0.4629      | 2113.21484   | 68.69870     | 50.3962 |

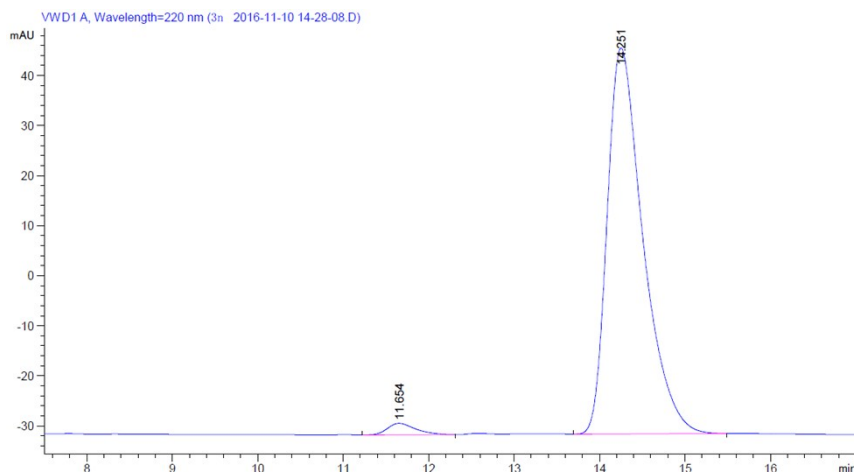

| Peak # | RetTime [min] | Type | Width [min] | Area [mAU*s] | Height [mAU] | Area %  |
|--------|---------------|------|-------------|--------------|--------------|---------|
| 1      | 11.654        | BB   | 0.3397      | 51.96469     | 2.29058      | 2.2627  |
| 2      | 14.251        | BB   | 0.4376      | 2244.57690   | 77.11256     | 97.7373 |

***N*-benzhydryl-1-(*o*-tolyl)ethan-1-imine (3o')**: white solid, unknown compound. (Major):  $^1\text{H NMR}$  (500 MHz,  $\text{CDCl}_3$ )  $\delta$  7.54–7.18 (m, 13H), 6.90 (dd,  $J = 7.5, 1.4$  Hz, 1H), 5.30 (s, 1H), 2.40 (s, 3H), 2.31 (s, 1H), 2.02 (s, 3H). HRMS calcd for  $\text{C}_{22}\text{H}_{22}\text{N}$   $[\text{M}+\text{H}]^+$ : 300.17577, found: 300.17526.

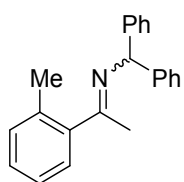

***N*-benzhydryl-1-(2-chlorophenyl)ethan-1-imine (3p')**: white solid, unknown compound. (Major): <sup>1</sup>H NMR (500 MHz, CDCl<sub>3</sub>) δ 7.50–7.19 (m, 13H), 6.89 (dd, *J* = 7.5, 1.7 Hz, 1H), 5.28 (s, 1H), 2.45 (s, 3H). HRMS calcd for C<sub>21</sub>H<sub>19</sub>ClN [M+H]<sup>+</sup>: 320.12005, found: 320.12003.

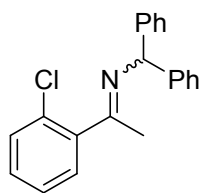

***N*-benzhydryl-1-(naphthalen-2-yl)ethan-1-amine (3q)**: 94% yield, 99% ee, white solid, unknown compound. [ $\alpha$ ]<sub>D</sub><sup>25</sup> = -53.3° (c = 0.3, MeOH). <sup>1</sup>H NMR (500 MHz, CDCl<sub>3</sub>) δ 7.91 (d, *J* = 8.0 Hz, 2H), 7.86 (d, *J* = 7.5 Hz, 1H), 7.69 (s, 1H), 7.58–7.48 (m, 3H), 7.40 (dd, *J* = 4.1, 1.6 Hz, 4H), 7.33 (dd, *J* = 16.7, 8.3 Hz, 5H), 7.24 (t, *J* = 7.1 Hz, 1H), 4.72 (s, 1H), 3.92 (q, *J* = 6.4 Hz, 1H), 1.52 (d, *J* = 6.7 Hz, 3H); <sup>13</sup>C NMR (125 MHz, CDCl<sub>3</sub>) δ 144.6, 143.6, 143.0, 133.5, 132.9, 128.5, 128.4, 127.8, 127.7, 127.4, 127.0, 126.9, 126.0, 125.5, 124.8, 63.8, 55.4, 24.4. IR (KBr)  $\nu$ : 3447.9, 3054.3, 2966.5, 1637.8, 1449.9 cm<sup>-1</sup>. Enantiomeric excess was determined <sup>1</sup>H NMR using (*S*)-2-acetoxy-2-phenylacetic acid as shift reagent. HRMS calcd for C<sub>25</sub>H<sub>24</sub>N [M+H]<sup>+</sup>: 338.19033, found: 338.19043.

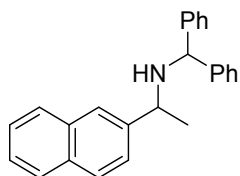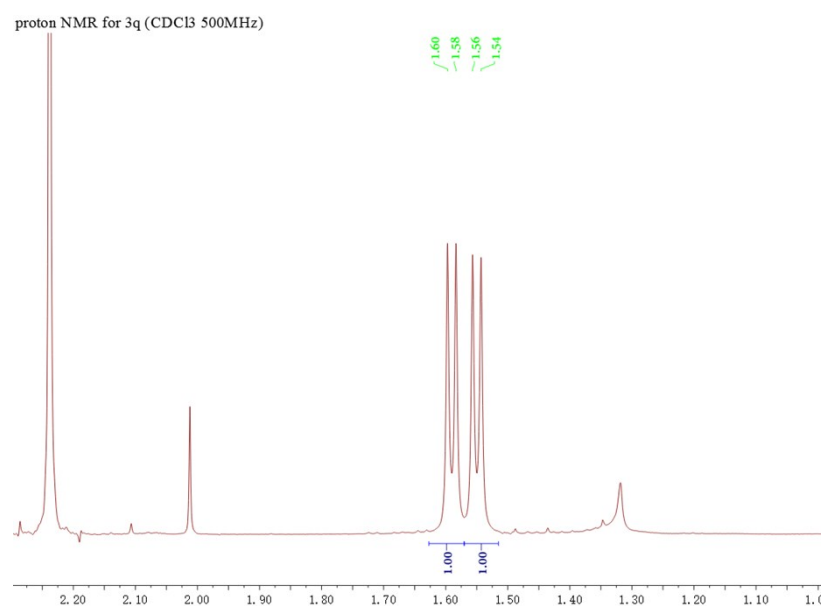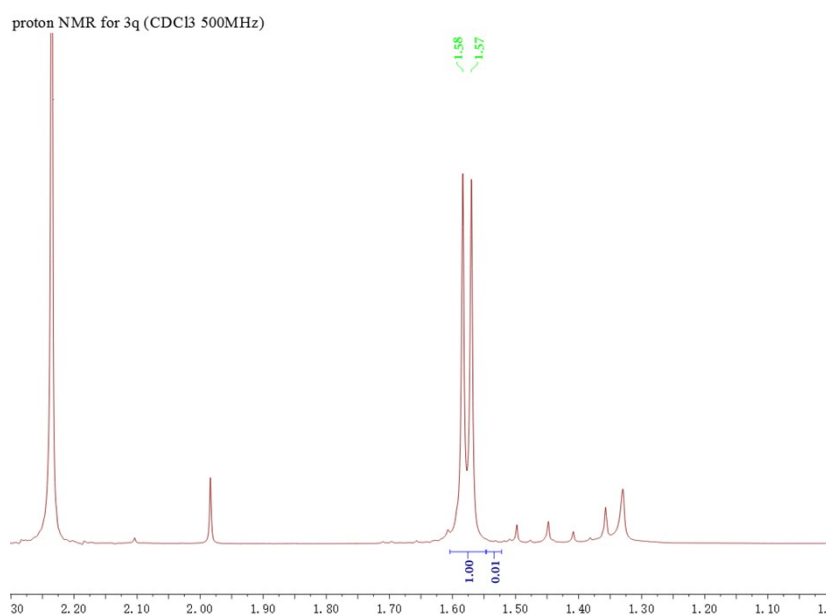

***N*-benzhydryl-1-(pyridin-2-yl)ethan-1-amine (3r)**: 76% yield, 93% ee, clear oil, unknown compound.  $[\alpha]_D^{25} = -50.4^\circ$  ( $c = 0.3$ , MeOH).  $^1\text{H NMR}$  (500 MHz,  $\text{CDCl}_3$ )  $\delta$  8.66 (d,  $J = 4.6$  Hz, 1H), 7.66 (td,  $J = 7.6, 1.8$  Hz, 1H), 7.45 (d,  $J = 7.5$  Hz, 2H), 7.37 (dd,  $J = 12.8, 7.3$  Hz, 4H), 7.33–7.26 (m, 3H), 7.22 (dd,  $J = 10.9, 7.3$  Hz, 3H), 4.67 (s, 1H), 3.85 (q,  $J = 6.7$  Hz, 1H), 1.47 (d,  $J = 6.7$  Hz, 3H);  $^{13}\text{C NMR}$  (125 MHz,  $\text{CDCl}_3$ )  $\delta$  164.6, 149.6, 144.6, 143.6, 136.28, 128.5, 128.4, 127.7, 127.4, 127.0, 126.9, 121.9, 64.5, 56.5, 23.1. IR (KBr)  $\nu$ : 3314.8, 3060.6, 3022.0, 2969.1, 1586.1, 1442.5  $\text{cm}^{-1}$ . Enantiomeric excess was determined by chiral HPLC: Chiralpak OD-H column, Hex/IPA = 90:10, 1 mL/min, 220 nm, 4.6 min, 5.2 min. HRMS calcd for  $\text{C}_{20}\text{H}_{21}\text{N}_2$   $[\text{M}+\text{H}]^+$ : 289.16993, found: 289.17007.

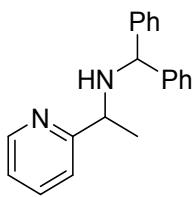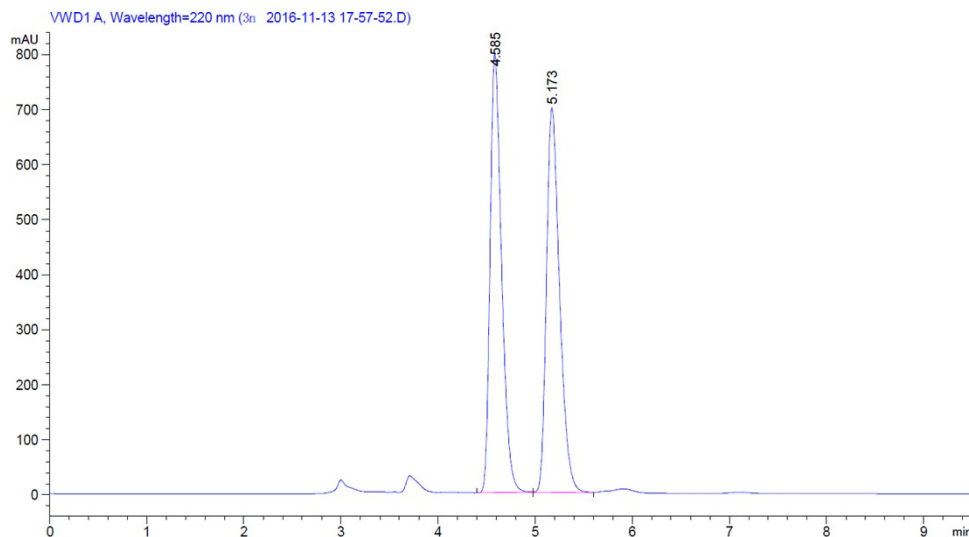

| Peak # | RetTime [min] | Type | Width [min] | Area [mAU*s] | Height [mAU] | Area %  |
|--------|---------------|------|-------------|--------------|--------------|---------|
| 1      | 4.585         | BB   | 0.1246      | 6526.83105   | 796.68225    | 49.9490 |
| 2      | 5.173         | BV   | 0.1432      | 6540.14844   | 698.47717    | 50.0510 |

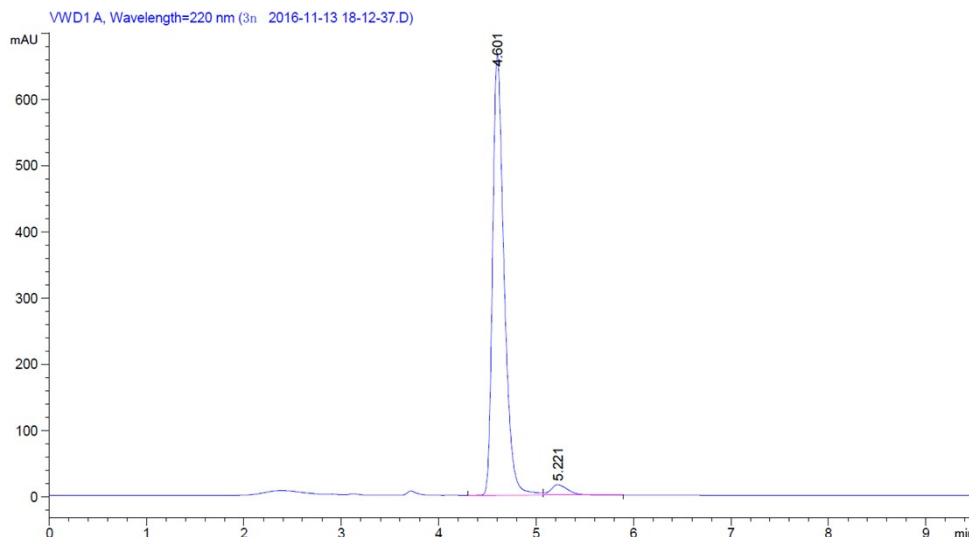

| Peak # | RetTime [min] | Type | Width [min] | Area [mAU*s] | Height [mAU] | Area %  |
|--------|---------------|------|-------------|--------------|--------------|---------|
| 1      | 4.601         | BV   | 0.1228      | 5465.53906   | 665.49359    | 96.5024 |
| 2      | 5.221         | VB   | 0.1930      | 198.09058    | 15.83363     | 3.4976  |

***N*-benzhydryl-1-(furan-2-yl)ethan-1-amine (3s)**: 94% yield, 92% ee, clear oil, unknown compound.  $[\alpha]^{25}_D = -59.4^\circ$  ( $c = 0.3$ , MeOH).  $^1\text{H NMR}$  (500 MHz,  $\text{CDCl}_3$ )  $\delta$  7.49 (d,  $J = 8.0$  Hz, 2H), 7.43 (s, 1H), 7.37 (d,  $J = 3.9$  Hz, 4H), 7.31 (q,  $J = 7.7$  Hz, 3H), 7.24 (t,  $J = 7.8$  Hz, 1H), 6.38 (s, 1H), 6.13 (s, 1H), 4.82 (s, 1H), 3.80 (q,  $J = 6.8$  Hz, 1H), 1.49 (d,  $J = 6.8$  Hz, 3H);  $^{13}\text{C NMR}$  (125 MHz,  $\text{CDCl}_3$ )  $\delta$  157.9, 144.5, 143.6, 141.4, 128.5, 128.5, 127.6, 127.4, 127.0, 127.0, 109.8, 105.6, 64.3, 48.9, 21.0. IR (KBr)  $\nu$ : 3461.7, 3062.1, 3027.9, 2974.2, 1453.6  $\text{cm}^{-1}$ . Enantiomeric excess was determined by  $^1\text{H NMR}$  using (*S*)-2-acetoxy-2-phenylacetic acid as shift reagent. HRMS calcd for  $\text{C}_{19}\text{H}_{20}\text{NO}$   $[\text{M}+\text{H}]^+$ : 278.15394, found: 278.15436.

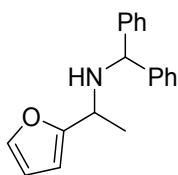

proton NMR for 3s ( $\text{CDCl}_3$ , 500MHz)

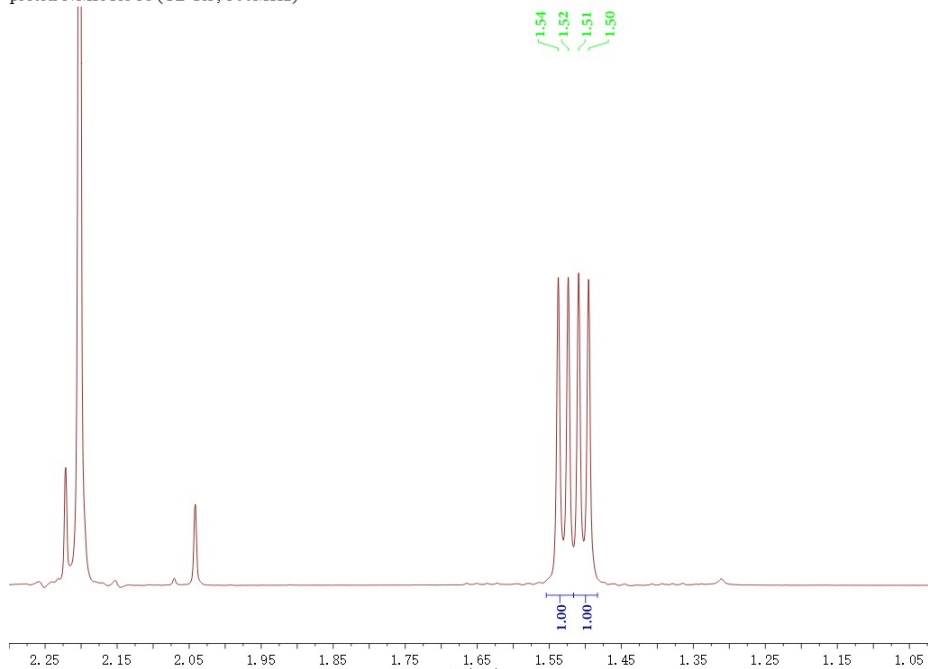

proton NMR for 3s ( $\text{CDCl}_3$ , 500MHz)

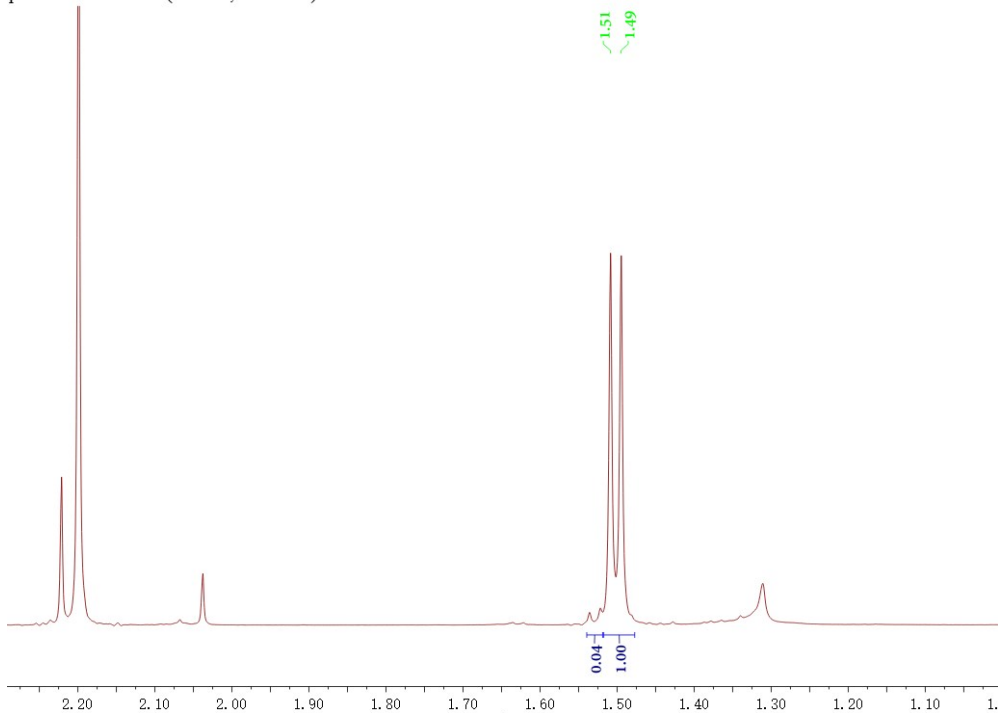

***N*-benzhydryl-1-(pyridin-2-yl)ethan-1-amine (3t)**: 90% yield, 86% ee, clear oil, unknown compound.  $[\alpha]^{25}_D = -9.4^\circ$  ( $c = 0.3$ , MeOH).  $^1\text{H NMR}$  (500 MHz,  $\text{CDCl}_3$ )  $\delta$  7.62 (d,  $J = 7.7$  Hz, 2H), 7.57 (d,  $J = 6.7$  Hz, 1H), 7.54 (d,  $J = 7.2$  Hz, 2H), 7.38 (dt,  $J = 13.0, 7.6$  Hz, 4H), 7.28 (q,  $J = 8.2, 7.4$  Hz, 5H), 5.20 (s, 1H), 4.23 (t,  $J = 6.9$  Hz, 1H), 3.03 (ddd,  $J = 15.8, 8.5, 3.9$  Hz, 1H), 2.81 (dt,  $J = 15.9, 8.0$  Hz, 1H), 2.59–2.46 (m, 1H), 1.88 (ddd,  $J = 15.3, 12.4, 8.3$  Hz, 1H).  $^{13}\text{C NMR}$  (125 MHz,  $\text{CDCl}_3$ )  $\delta$  144.9, 143.3, 128.5, 127.5, 127.4, 127.1, 127.1, 126.3, 124.7, 124.3, 65.2, 61.0, 34.6, 30.3. IR (KBr)  $\nu$ : 3427.1, 3026.6, 2944.1, 1451.1, 1026.6  $\text{cm}^{-1}$ . Enantiomeric excess was determined by chiral HPLC: Chiralpak IA-3 column, Hex/IPA = 99.5:0.5, 1 mL/min, 220 nm, 6.2 min, 7.3 min. HRMS calcd for  $\text{C}_{22}\text{H}_{22}\text{N}$   $[\text{M}+\text{H}]^+$ : 300.17468, found: 300.17490.

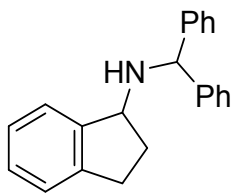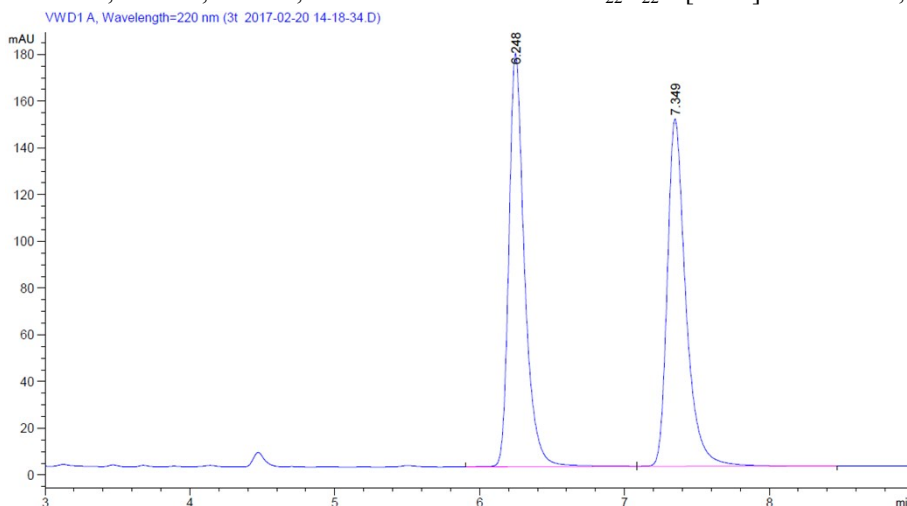

| Peak # | RetTime [min] | Type | Width [min] | Area [mAU*s] | Height [mAU] | Area %  |
|--------|---------------|------|-------------|--------------|--------------|---------|
| 1      | 6.248         | BB   | 0.1121      | 1321.68103   | 177.01202    | 50.0853 |
| 2      | 7.349         | BB   | 0.1334      | 1317.17871   | 148.67311    | 49.9147 |

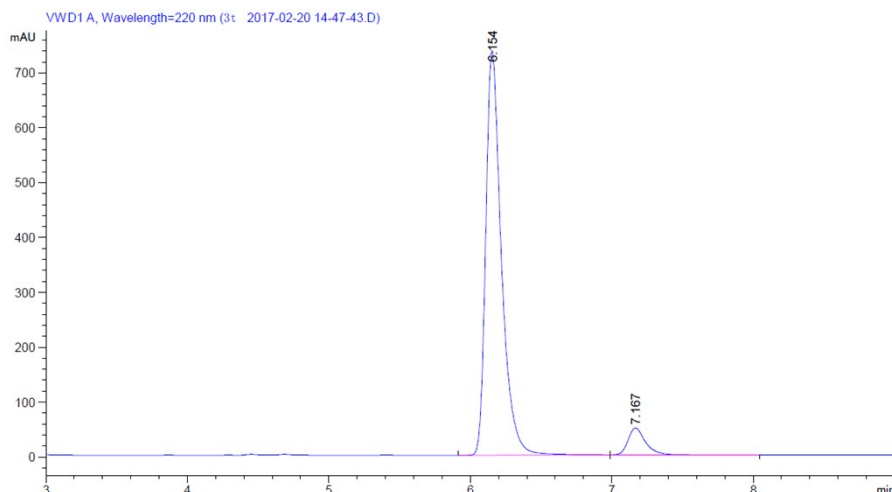

| Peak # | RetTime [min] | Type | Width [min] | Area [mAU*s] | Height [mAU] | Area %  |
|--------|---------------|------|-------------|--------------|--------------|---------|
| 1      | 6.154         | BV   | 0.1158      | 5673.66553   | 736.93341    | 92.8364 |
| 2      | 7.167         | VB   | 0.1312      | 437.80048    | 49.49916     | 7.1636  |

***N*-benzhydryl-1-phenylpropan-1-amine (3u)**: 51% yield, 90% ee, clear oil, unknown compound.  $[\alpha]_D^{25} = -35.0^\circ$  ( $c = 0.4$ , MeOH).  $^1\text{H NMR}$  (500 MHz,  $\text{CDCl}_3$ )  $\delta$  7.38 – 7.29 (m, 6H), 7.23 (dq,  $J = 17.9, 9.9, 8.4$  Hz, 8H), 7.15 (t,  $J = 7.1$  Hz, 1H), 4.59 (s, 1H), 3.40 (t,  $J = 7.0$  Hz, 1H), 1.70 (dtt,  $J = 64.3, 14.7, 7.3$  Hz, 3H), 0.81 (t,  $J = 6.8$  Hz, 3H).  $^{13}\text{C NMR}$  (125 MHz,  $\text{CDCl}_3$ -*d*)  $\delta$  128.46, 128.38, 128.33, 127.83, 127.38, 126.94, 126.85, 63.63, 61.80, 31.16, 11.01. Enantiomeric excess was determined by chiral HPLC: Chiralpak OD-H column, Hex/IPA = 99.6:0.4, 0.8 mL/min, 220 nm, 8.4 min, 9.0 min. HRMS calcd for  $\text{C}_{22}\text{H}_{22}\text{N}$   $[\text{M}+\text{H}]^+$ : 300.17468, found: 300.17490.

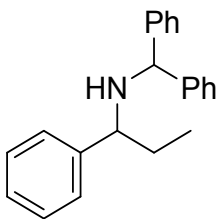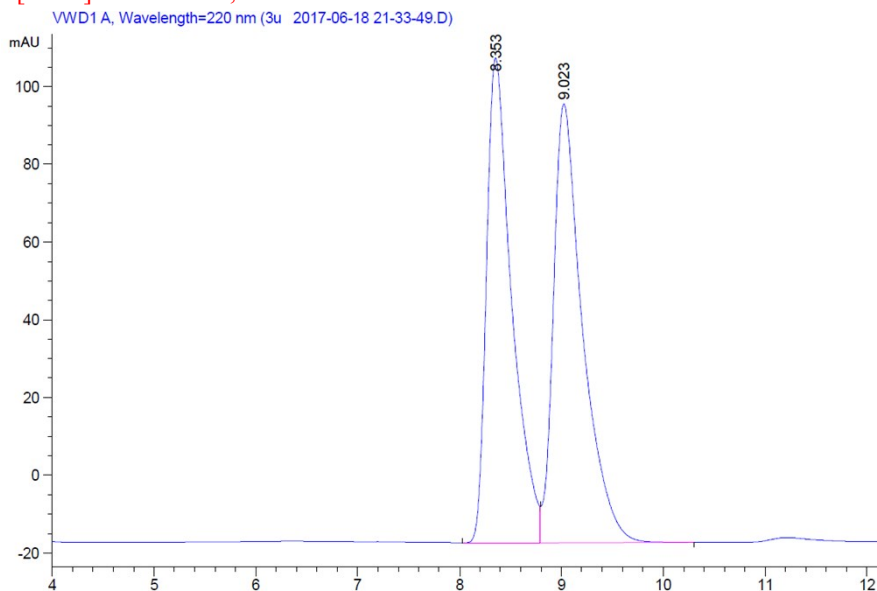

| Peak # | RetTime [min] | Type | Width [min] | Area [mAU*s] | Height [mAU] | Area %  |
|--------|---------------|------|-------------|--------------|--------------|---------|
| 1      | 8.353         | BV   | 0.2546      | 2155.42358   | 124.73232    | 48.9154 |
| 2      | 9.023         | VB   | 0.2927      | 2251.00977   | 112.87238    | 51.0846 |

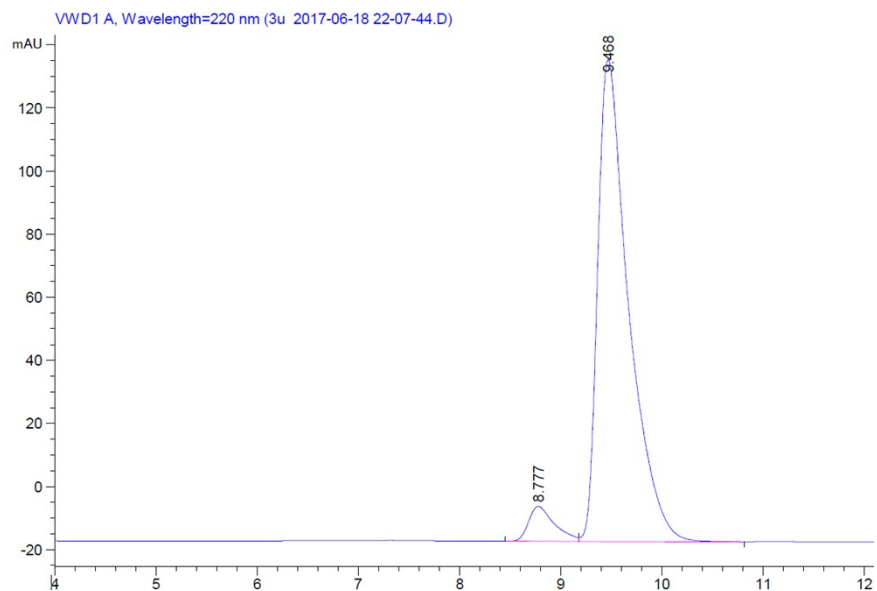

| Peak # | RetTime [min] | Type | Width [min] | Area [mAU*s] | Height [mAU] | Area %  |
|--------|---------------|------|-------------|--------------|--------------|---------|
| 1      | 8.777         | BV   | 0.2606      | 195.82176    | 11.05770     | 5.7006  |
| 2      | 9.468         | VB   | 0.3125      | 3239.27124   | 152.69235    | 94.2994 |

## VI General Procedure for Removal of Diphenylmethyl Group

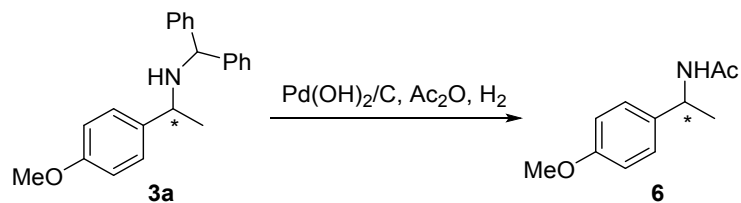

**3a** (0.2 mmol), acetic anhydride (2 drops), 6 mg of Pd(OH)<sub>2</sub>/C (20%, 50% wetted with water) and CH<sub>2</sub>Cl<sub>2</sub> (2.0 mL) were added to a vial. The resulting vial was transferred to an autoclave, which was charged with 25 atm of H<sub>2</sub>, and stirred at 40 °C for 20 h. The hydrogen gas was released slowly and the solution was filtered to remove Pd(OH)<sub>2</sub>/C. The filtrate was concentrated and then purified by flash column chromatography (EtOAc/Hex) to yield the desired product **6** (95% yield).

**N-(1-(4-methoxyphenyl)ethyl)acetamide (6)**:<sup>[5]</sup> 95% yield, 96% ee, white solid, known compound.  $[\alpha]_D^{25} = -138.0^\circ$  (c = 0.4, MeOH). <sup>1</sup>H NMR (500 MHz, CDCl<sub>3</sub>) δ 7.29 (d, *J* = 8.7 Hz, 2H), 6.91 (d, *J* = 8.7 Hz, 2H), 5.72 (s, 1H), 5.13 (p, *J* = 7.1 Hz, 1H), 3.84 (s, 3H), 2.01 (s, 3H), 1.51 (d, *J* = 6.9 Hz, 3H). IR (KBr) ν: 3255.3, 3076.2, 3011.2, 2958.7, 1639.1, 1245.6 cm<sup>-1</sup>. Enantiomeric excess was determined by chiral HPLC: Chiralpak OD-H column, Hex/IPA = 85:15, 1 mL/min, 220nm, 6.3 min, 7.4 min.

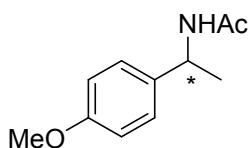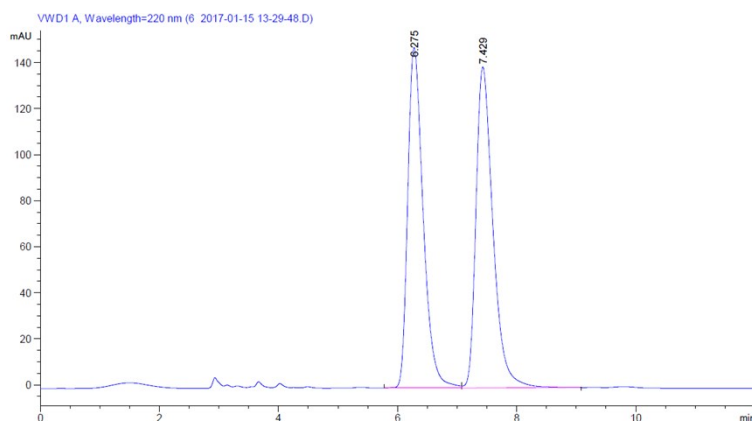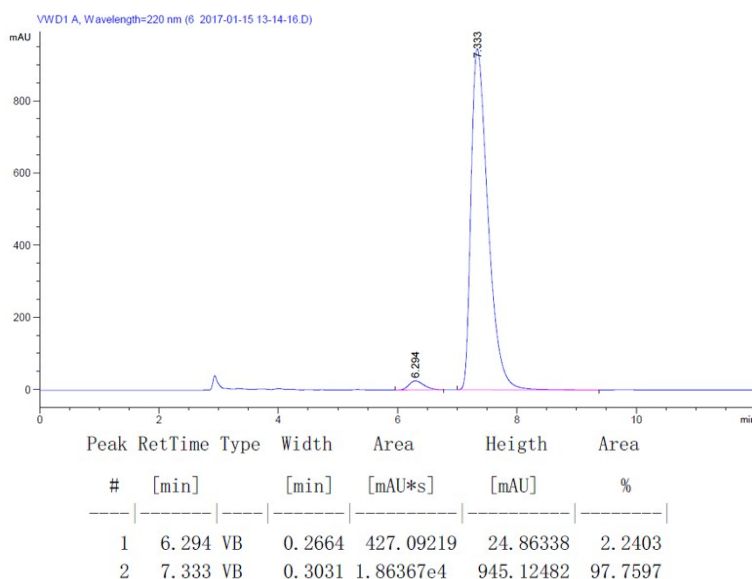



***N*-**(1-(3-methoxyphenyl)ethyl)acetamide (**7**):<sup>[5]</sup> 93% yield, 95% ee, white solid, known compound.  $[\alpha]_D^{25} = -108.3^\circ$  ( $c = 0.4$ , MeOH). Enantiomeric excess was determined by chiral HPLC after it was transformed to the corresponding acetamide: Chiralpak OD-H column, Hex/IPA=75:25, 1 mL/min, 220nm, 5.9 min, 8.8 min.

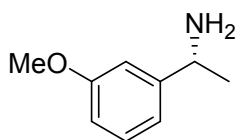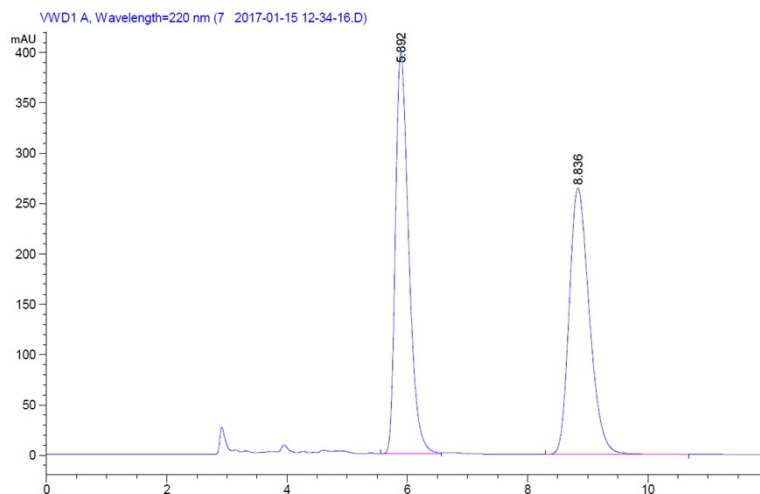

| Peak # | RetTime [min] | Type | Width [min] | Area [mAU*s] | Height [mAU] | Area %  |
|--------|---------------|------|-------------|--------------|--------------|---------|
| 1      | 5.892         | BV   | 0.2354      | 6134.65283   | 398.95340    | 50.0188 |
| 2      | 8.836         | BB   | 0.3587      | 6130.04688   | 264.15176    | 49.9812 |

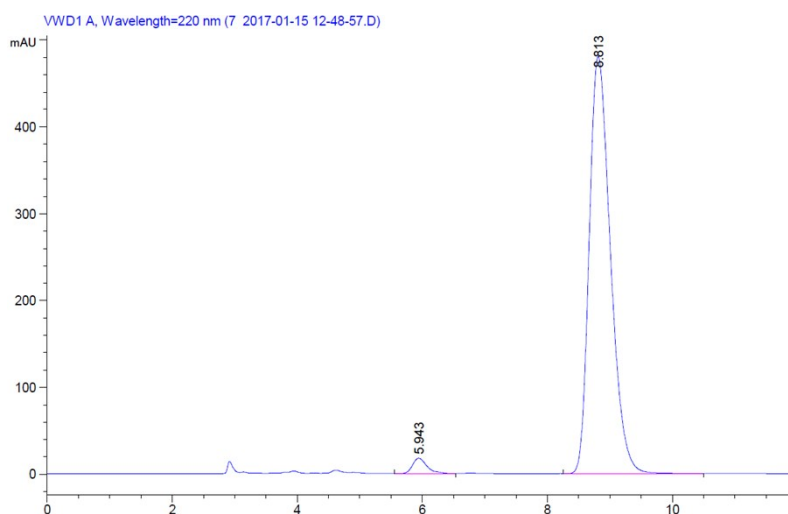

| Peak # | RetTime [min] | Type | Width [min] | Area [mAU*s] | Height [mAU] | Area %  |
|--------|---------------|------|-------------|--------------|--------------|---------|
| 1      | 5.943         | BB   | 0.2429      | 282.61298    | 17.73931     | 2.4443  |
| 2      | 8.813         | BB   | 0.3640      | 1.12795e4    | 480.32599    | 97.5557 |

## V References:

- [1] H. Huang, X. Liu, L. Zhou, M. Chang, X. Zhang, *Angew. Chem. Int. Ed.* **2016**, *55*, 5309–5312.
- [2] A. Nodzevska, K. Sidorowicz, M. Sienkiewicz, *Synthesis*, **2014**, *46*, 1475–1480.
- [3] W. J. Lu, Y. W. Chen, X. L. Hou, *Adv. Synth. Catal.*, **2010**, *352*, 103–107.
- [4] C. Wang, X. J. Wu, L. Zhou, J. Sun, *Chem. Eur. J.*, **2008**, *14*, 8789–8792.
- [5] G. Li, J.C. Antilla, *Org. Lett.*, **2009**, *11*(5):1075–1078.

## VI NMR & HRMS Spectra

proton NMR for 3a (CDCl<sub>3</sub>, 500MHz)

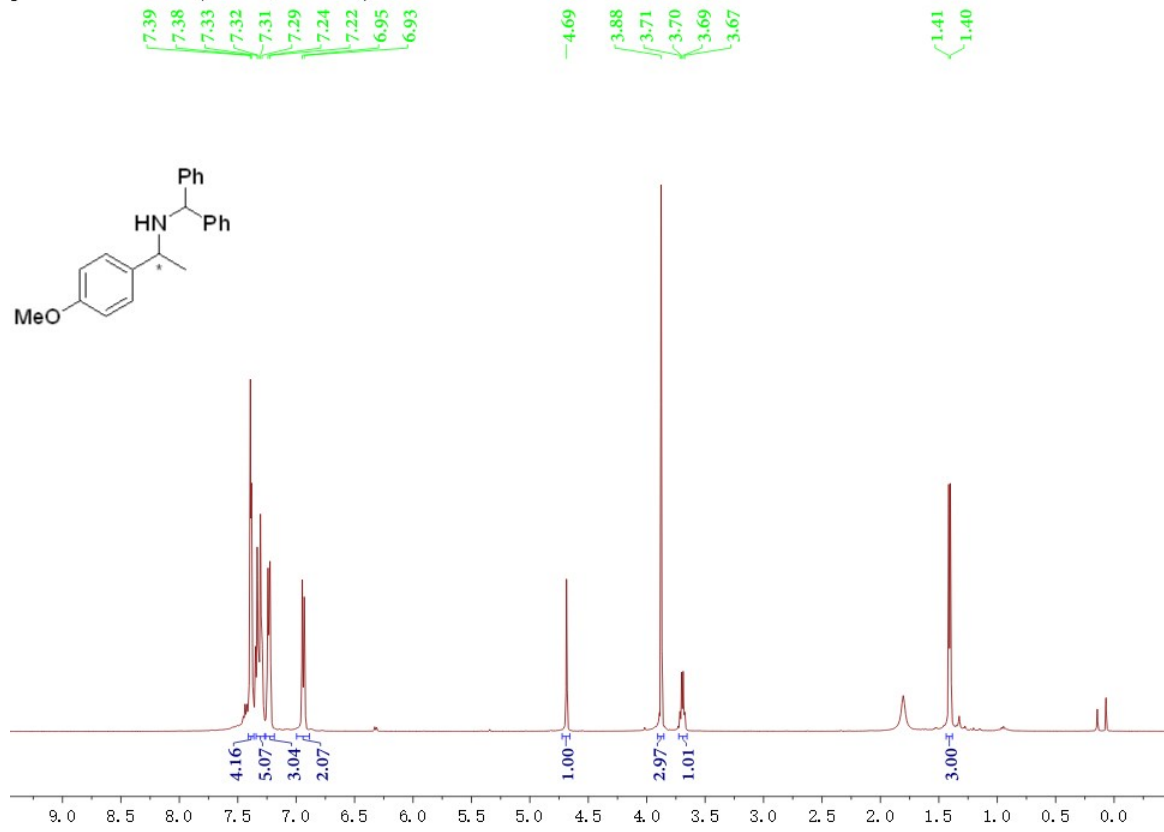

C13 for 3a (CDCl<sub>3</sub>, 125MHz)

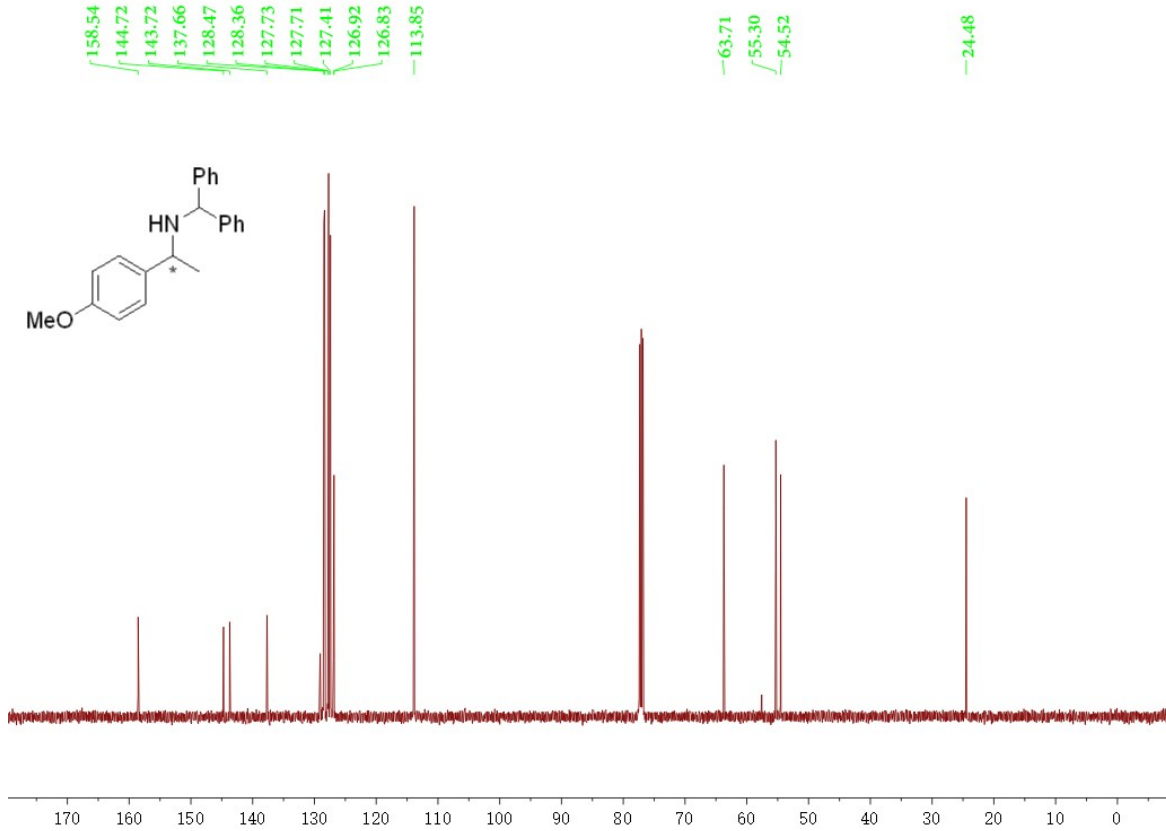

00088 #14 RT: 0.39 AV: 1 NL: 1.58E7  
T: FTMS + p ESI Full ms [150.00-2000.00]

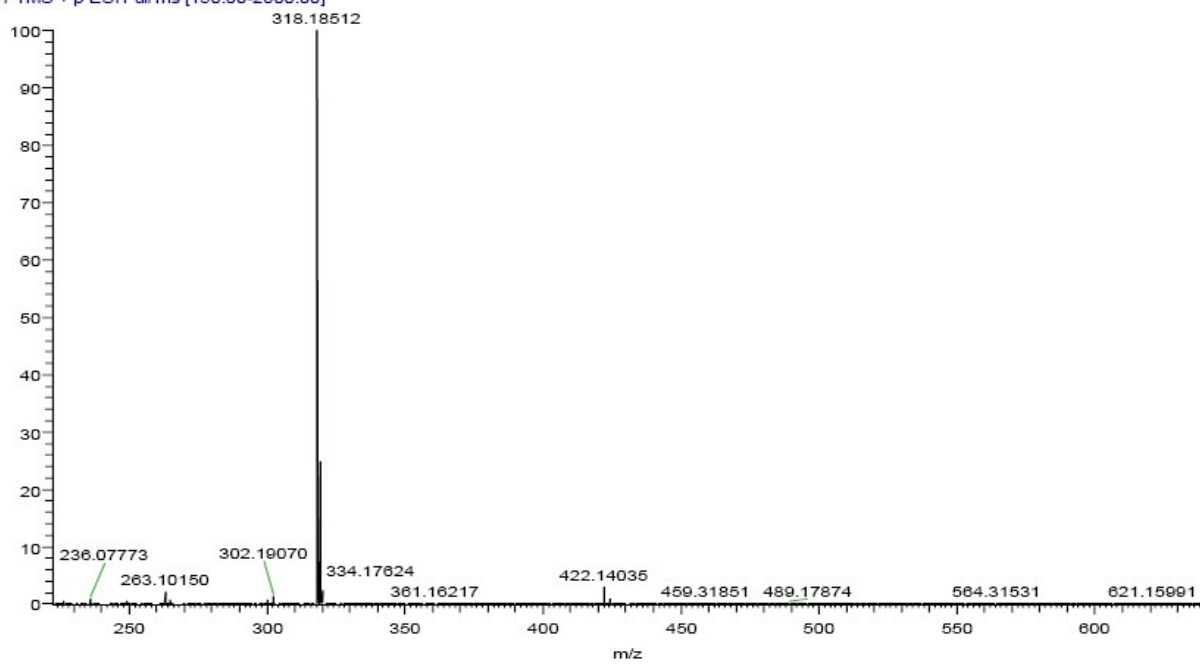

proton NMR for 4 (CDCl<sub>3</sub>, 500MHz)

7.35, 7.33, 7.16, 7.15, 7.13, 6.92, 6.90, 6.71, 6.70, 6.68, 6.58, 6.56, 4.52, 4.51, 4.50, 4.48, 3.84, 1.55, 1.54

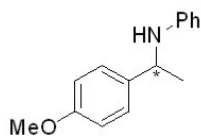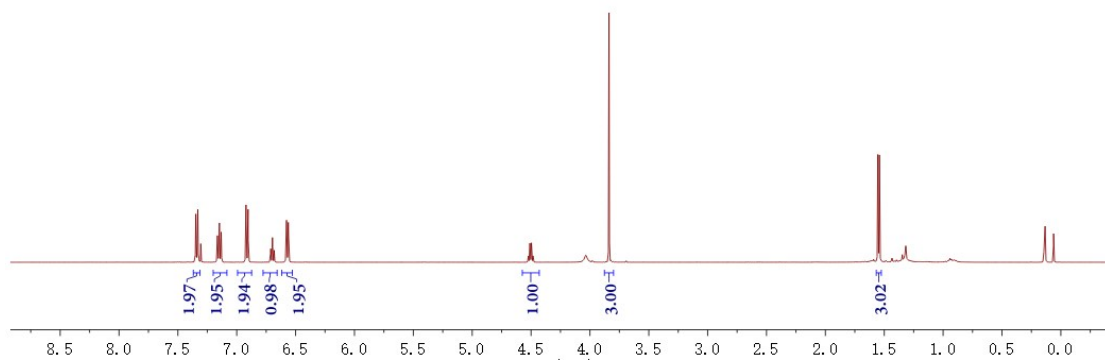

proton NMR for 5 (CDCl<sub>3</sub>, 500MHz)

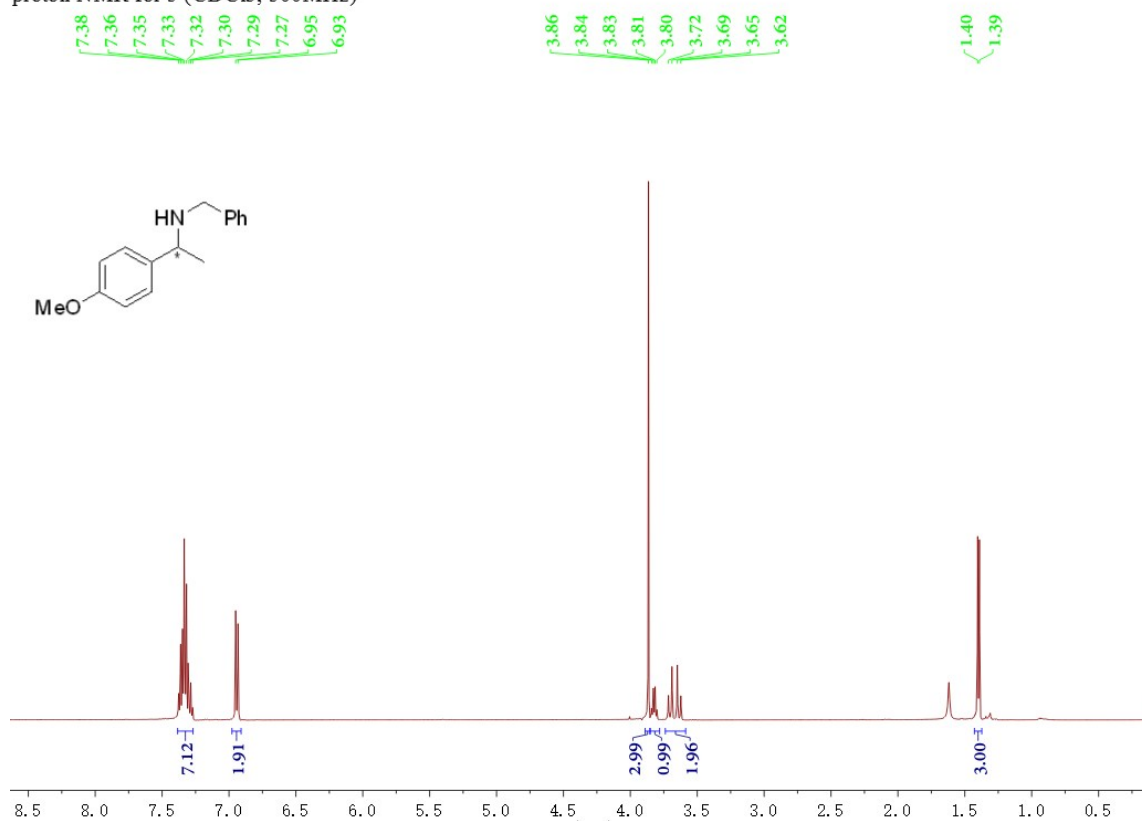

00083 #13 RT: 0.38 AV: 1 NL: 3.84E7  
T: FTMS + p ESI Full ms [150.00-2000.00]

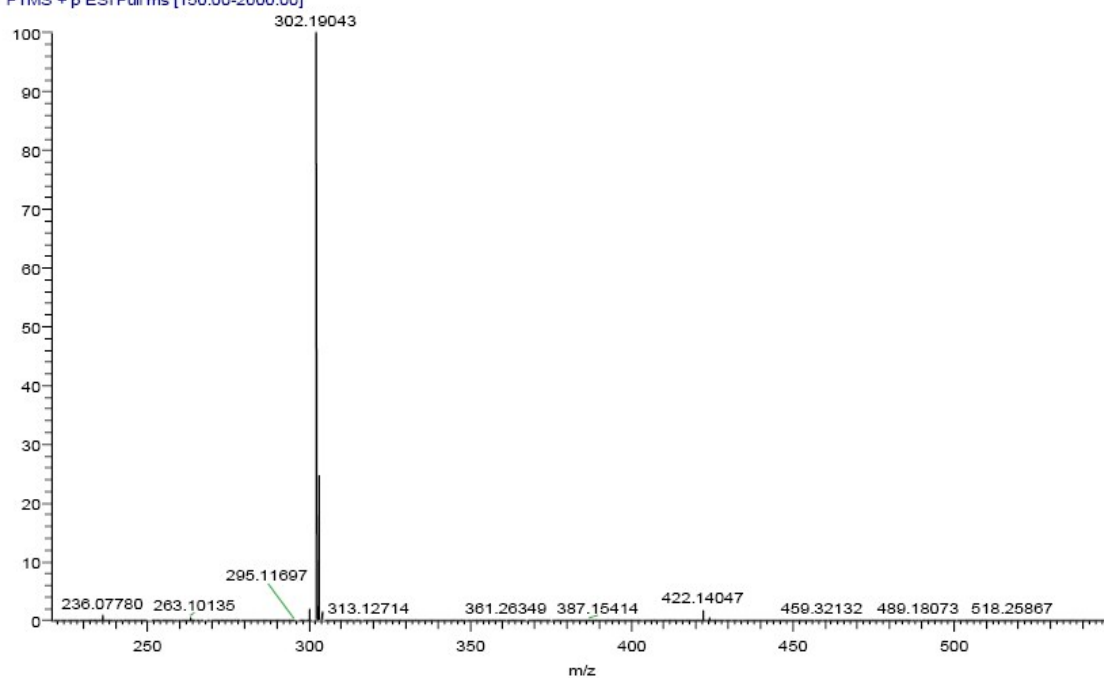

proton NMR for 3b (CDCl<sub>3</sub> 500MHz)

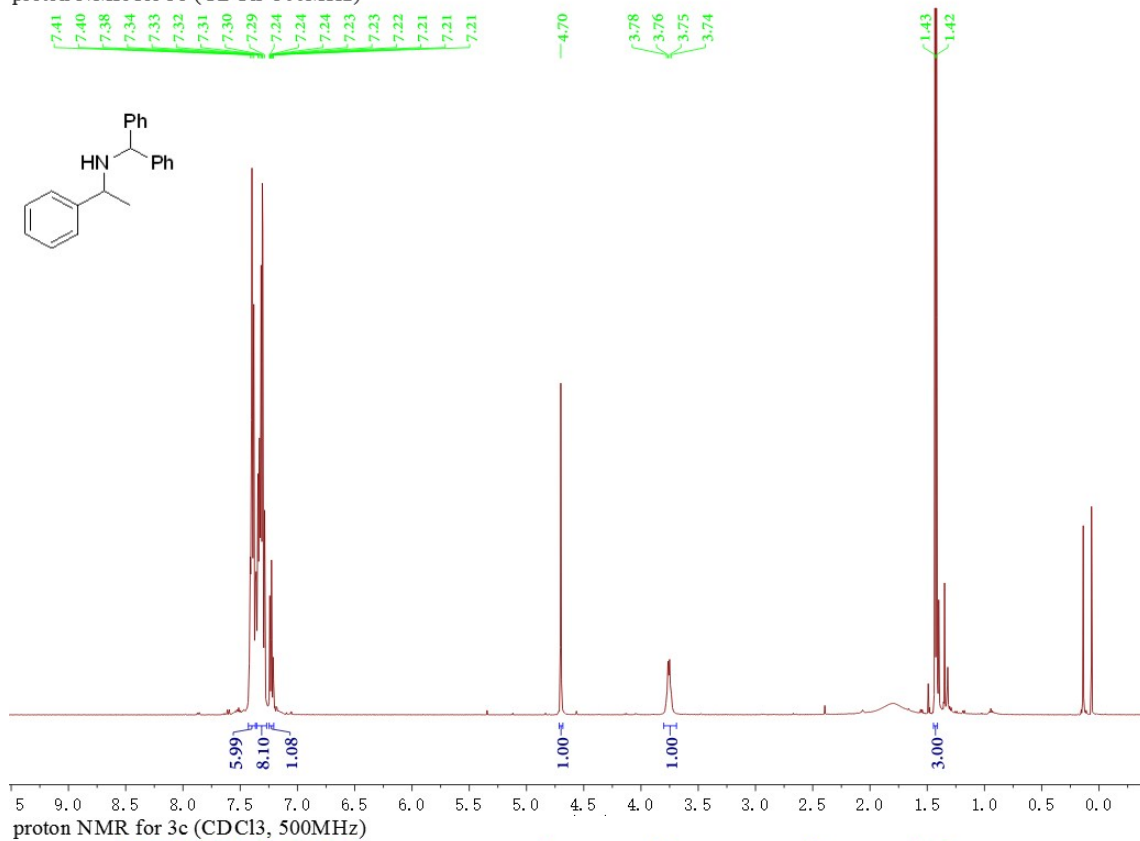

proton NMR for 3c (CDCl<sub>3</sub>, 500MHz)

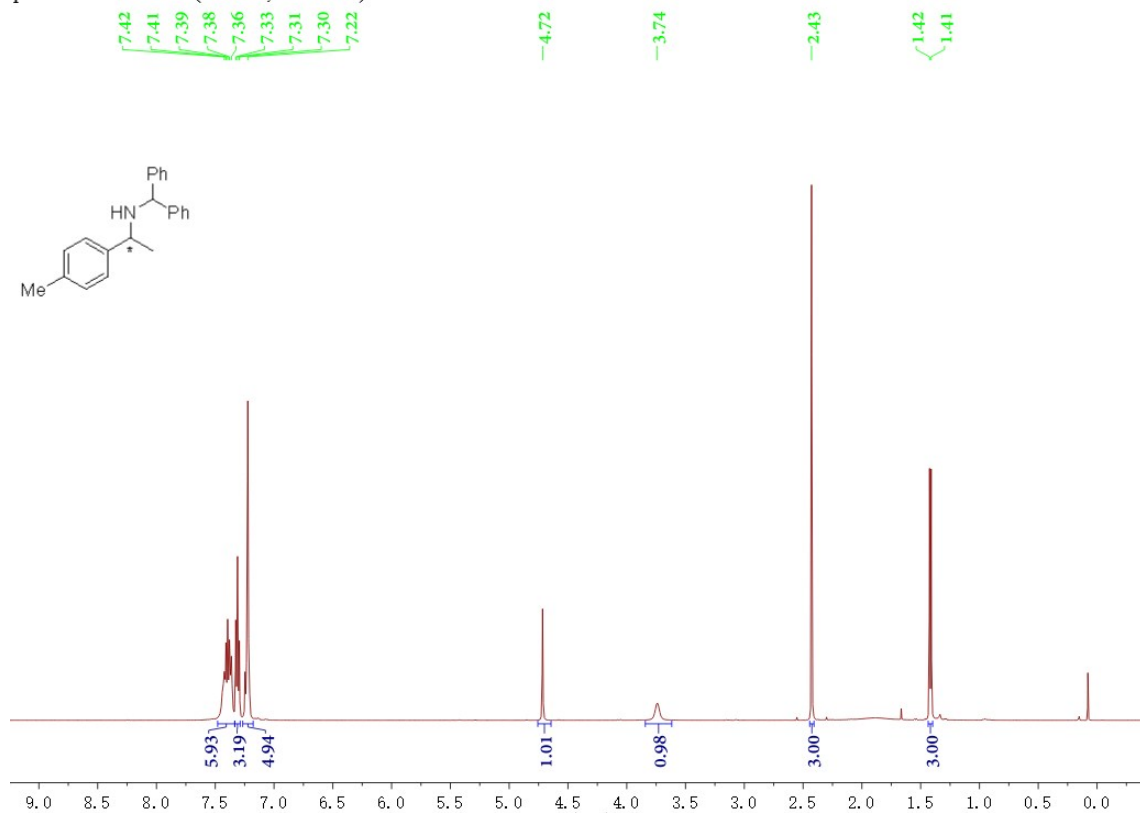

C13 for 3c (CDCl<sub>3</sub>, 125MHz)

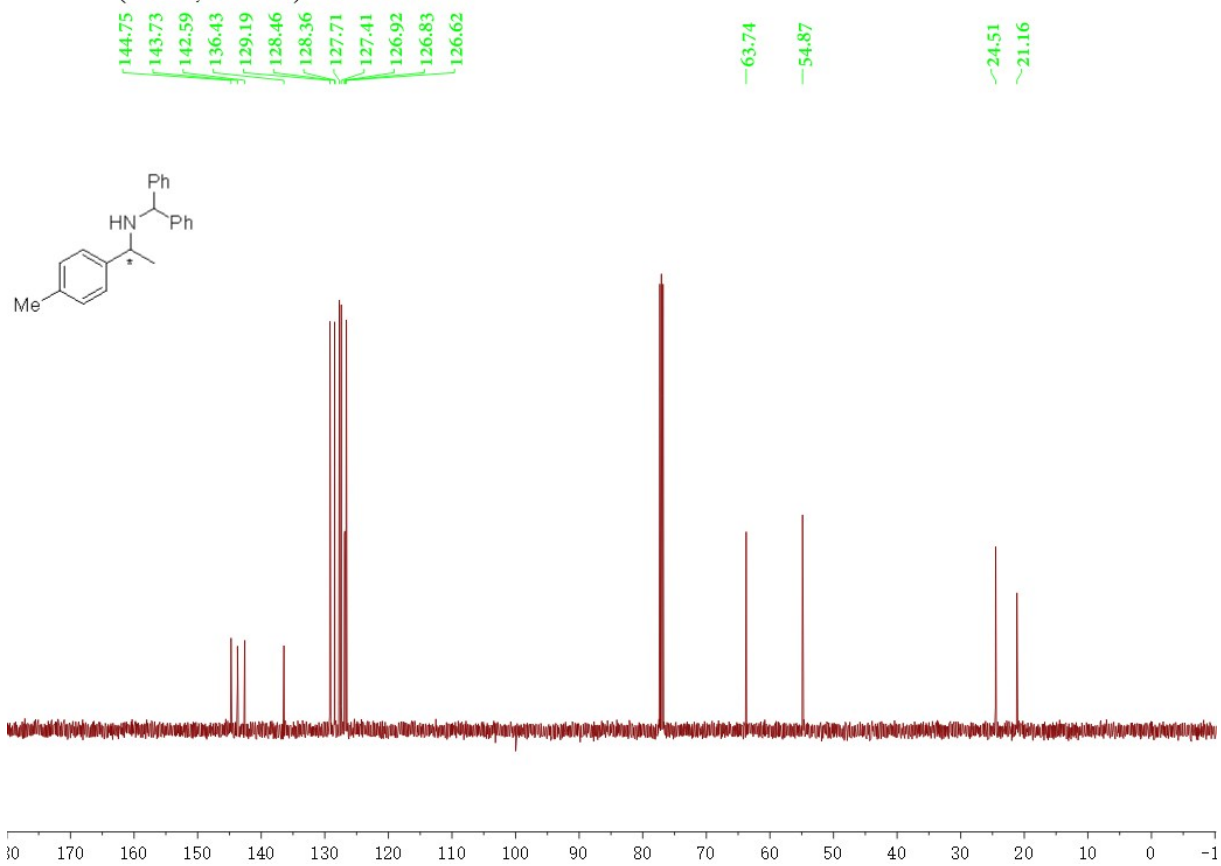

proton NMR for 3d (CDCl<sub>3</sub>, 500MHz)

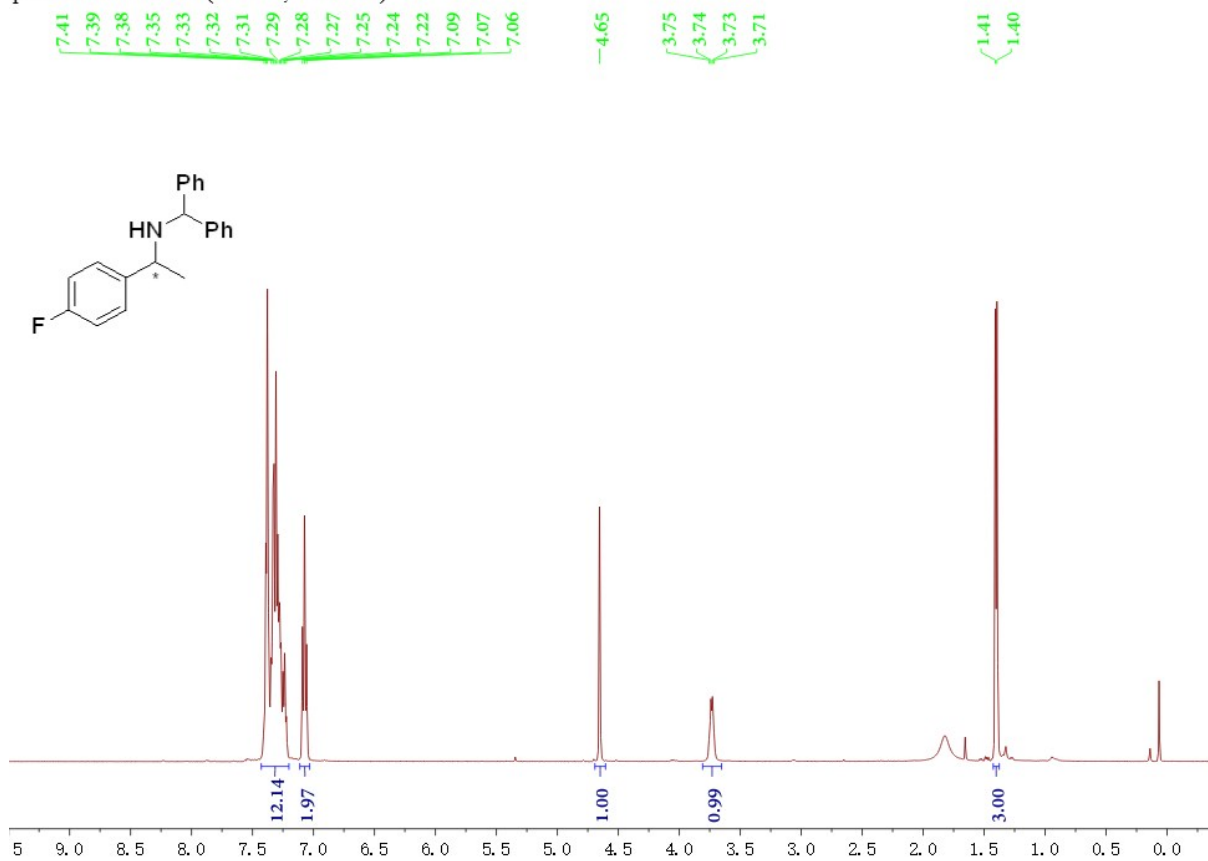

C13 for 3d (CDCl<sub>3</sub>, 125MHz)

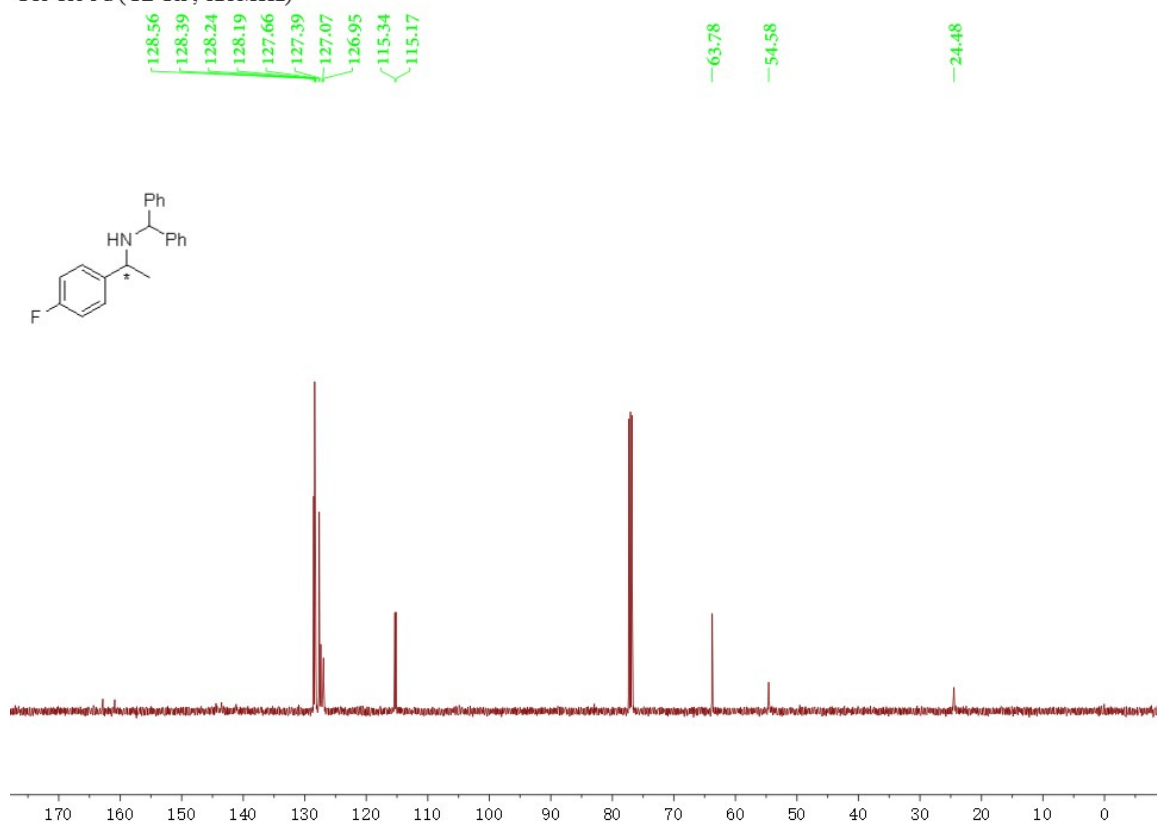

0031#23 RT: 0.35 AV: 1 NL: 1.38EB  
T: FIMS+pESI Full ms [200.00-2000.00]

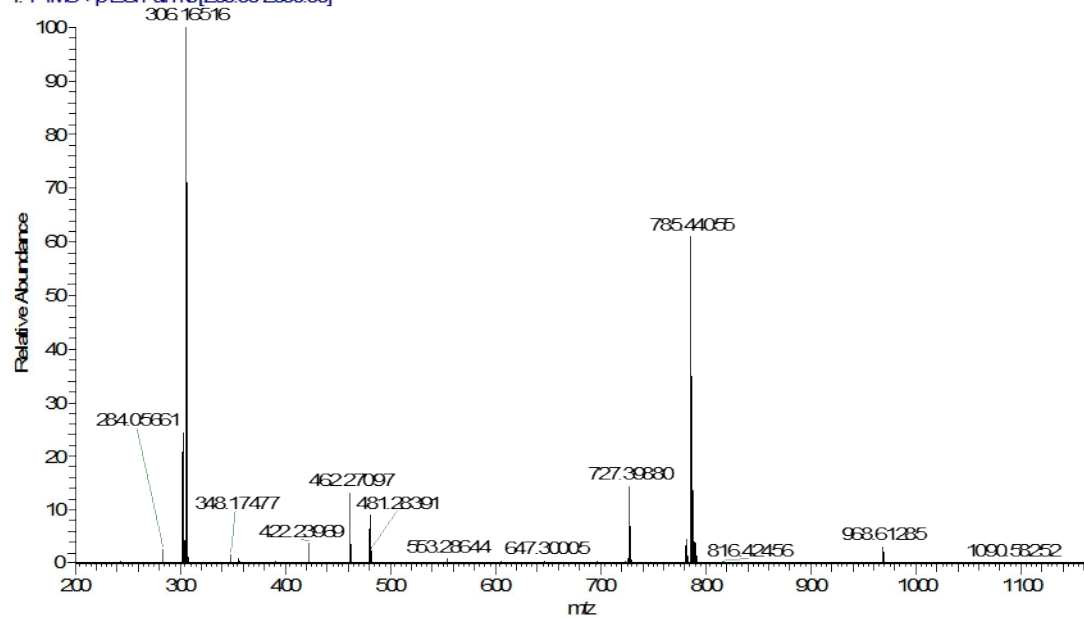

proton NMR for 3e (CDCl<sub>3</sub>, 500MHz)

7.38, 7.38, 7.37, 7.36, 7.34, 7.32, 7.32, 7.31, 7.30, 7.29, 7.25, 7.24, -4.64, 3.73, 3.72, 3.71, 3.69, 1.40, 1.39

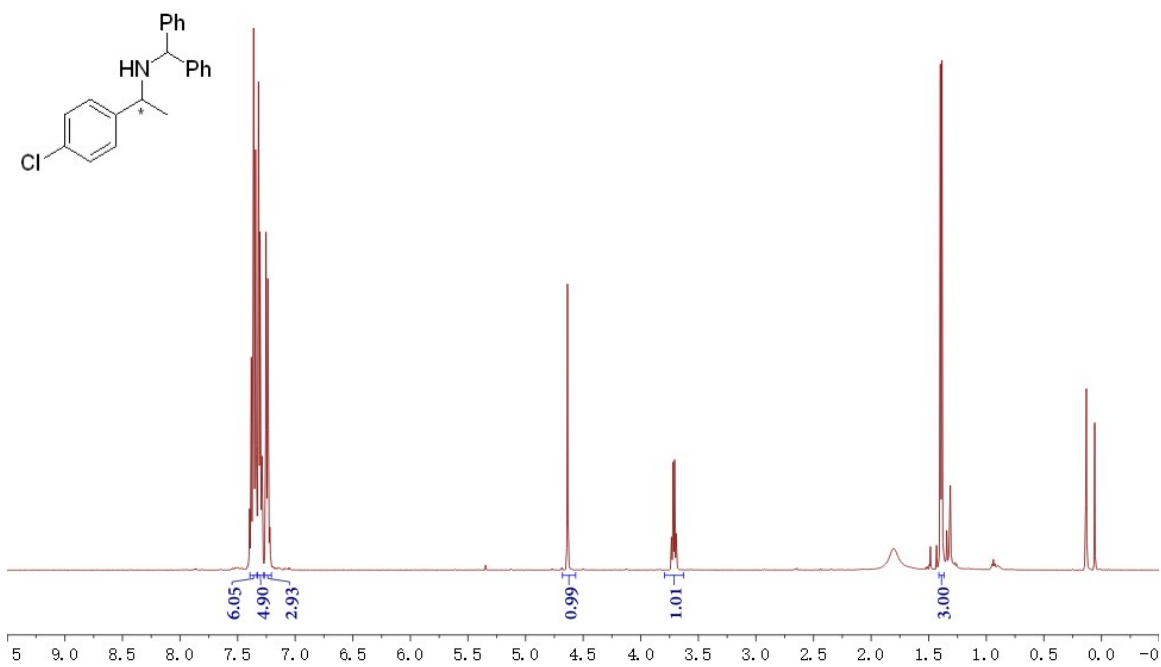



C13 for 3e (CDCl3, 125MHz)

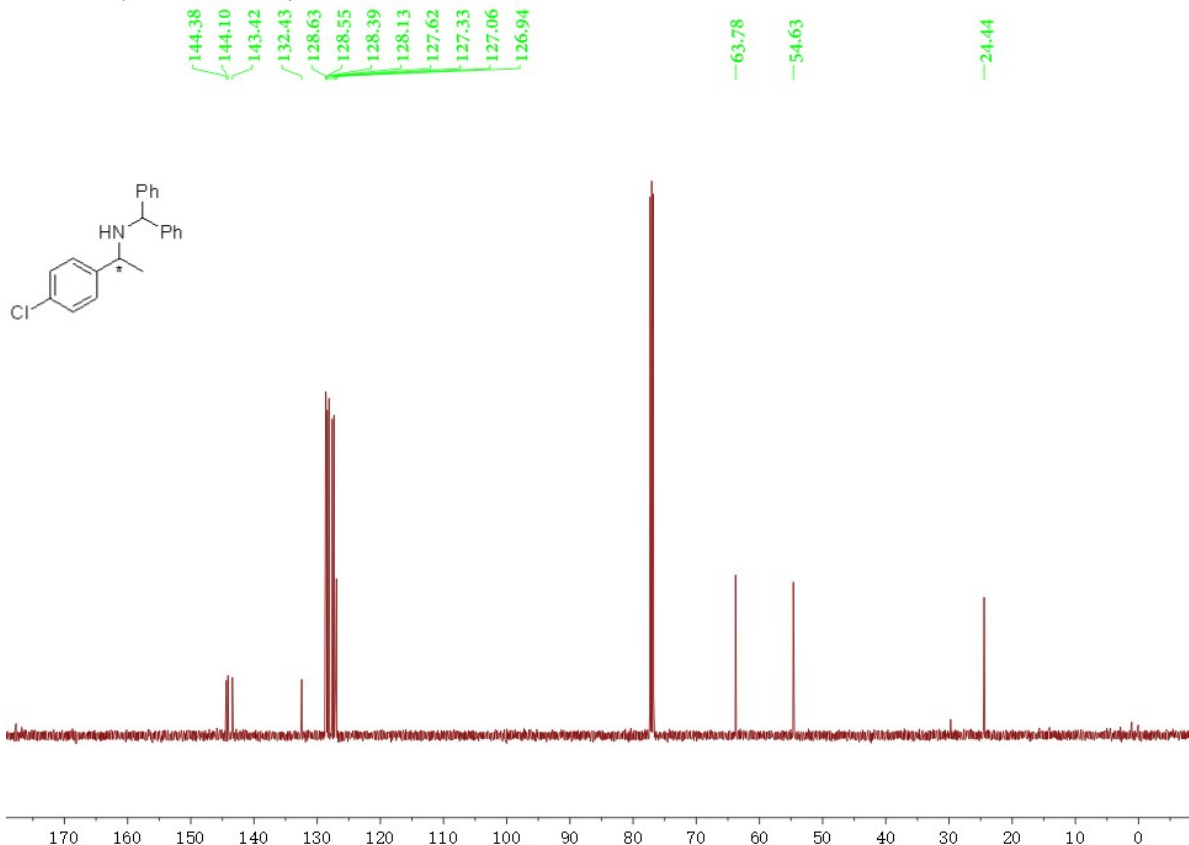

00085 #21 RT: 0.64 AV: 1 NL: 9.26E5  
T: FTMS + p ESI Full ms [150.00-2000.00]

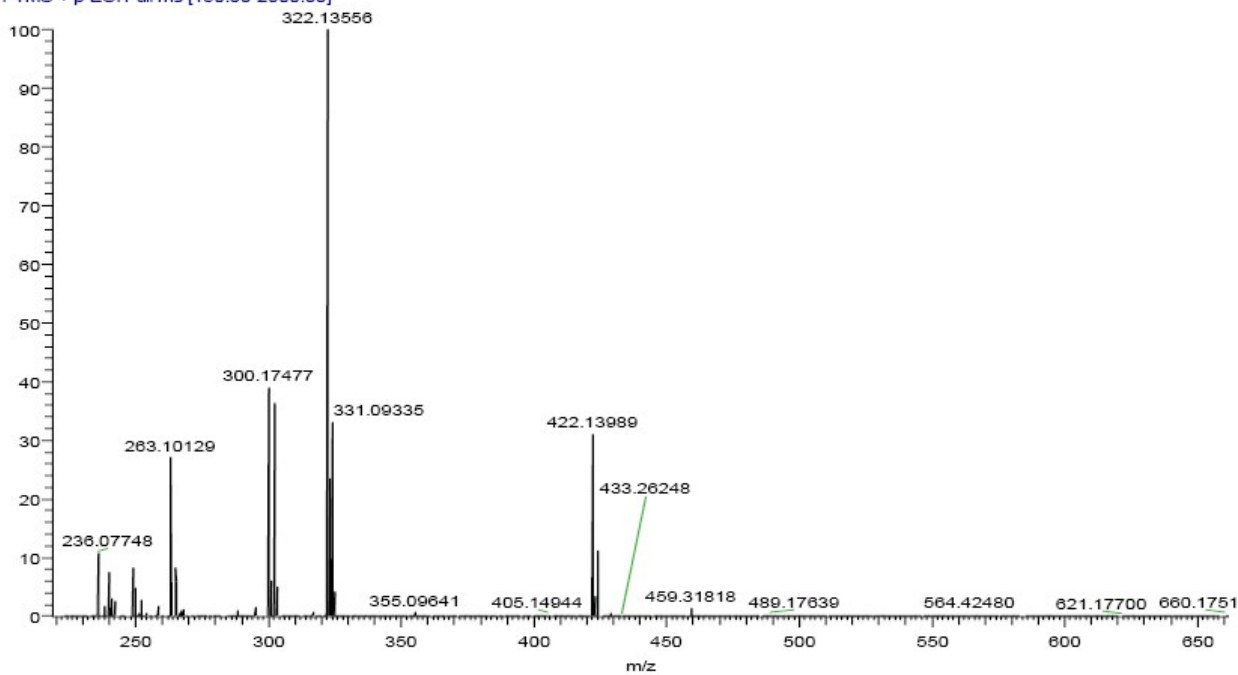

proton NMR for 3f (CDCl<sub>3</sub>, 500MHz)

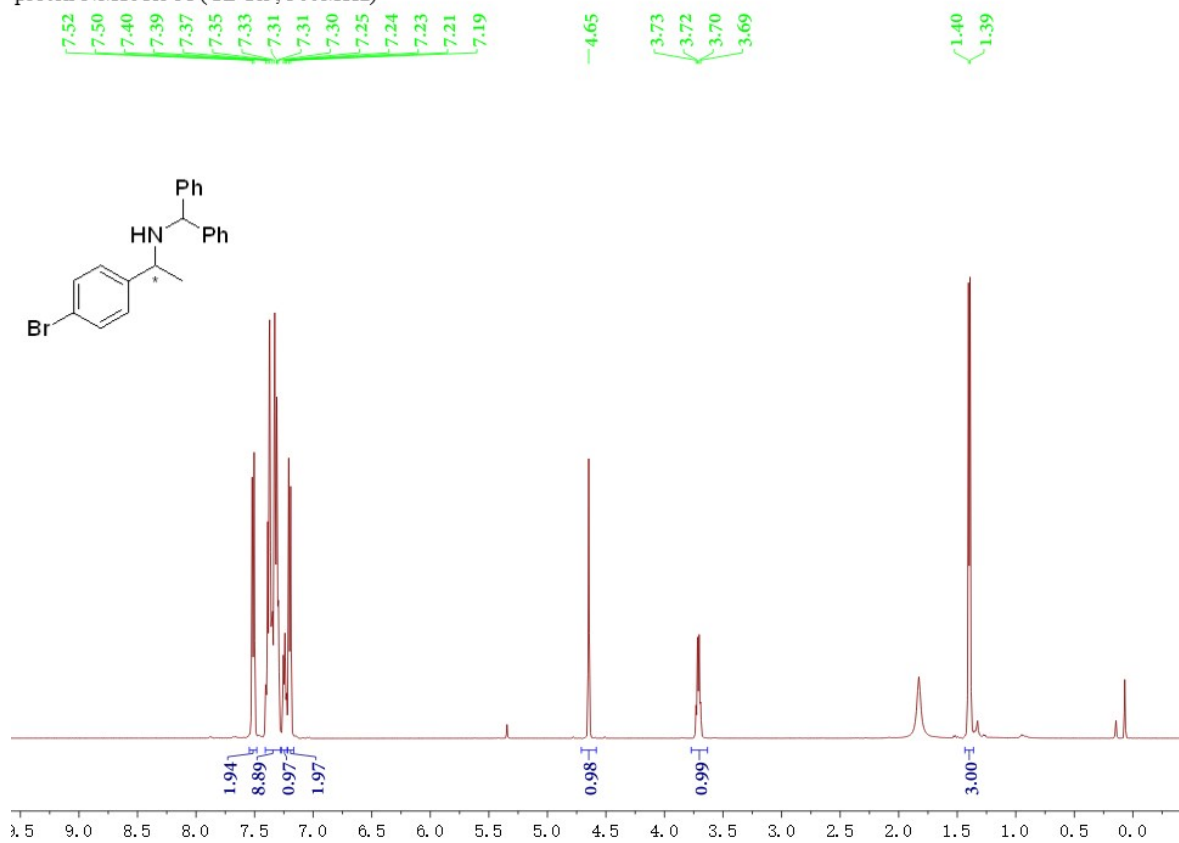

C13 for 3f (CDCl<sub>3</sub>, 125MHz)

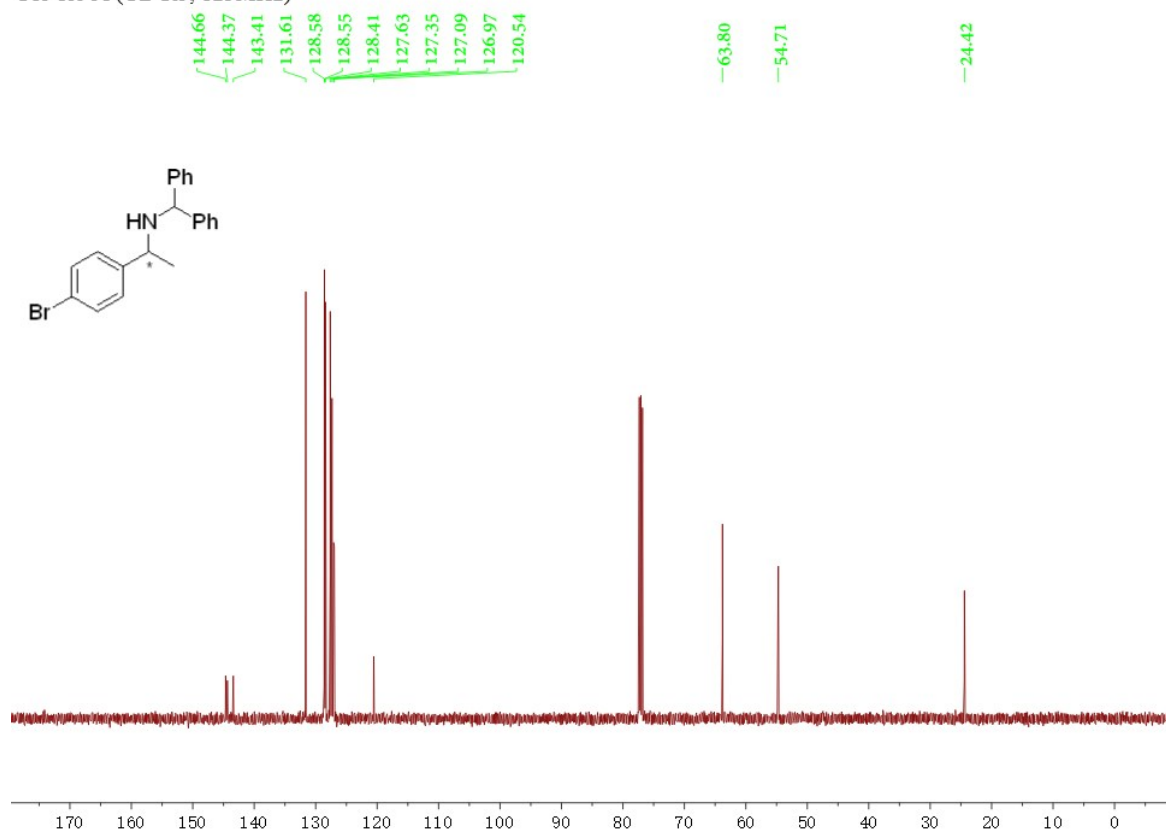

0003 #9 RT: 0.13 AV: 1 NL: 1.61EB  
T: FIMS+pESI Full ms[200.00-2000.00]

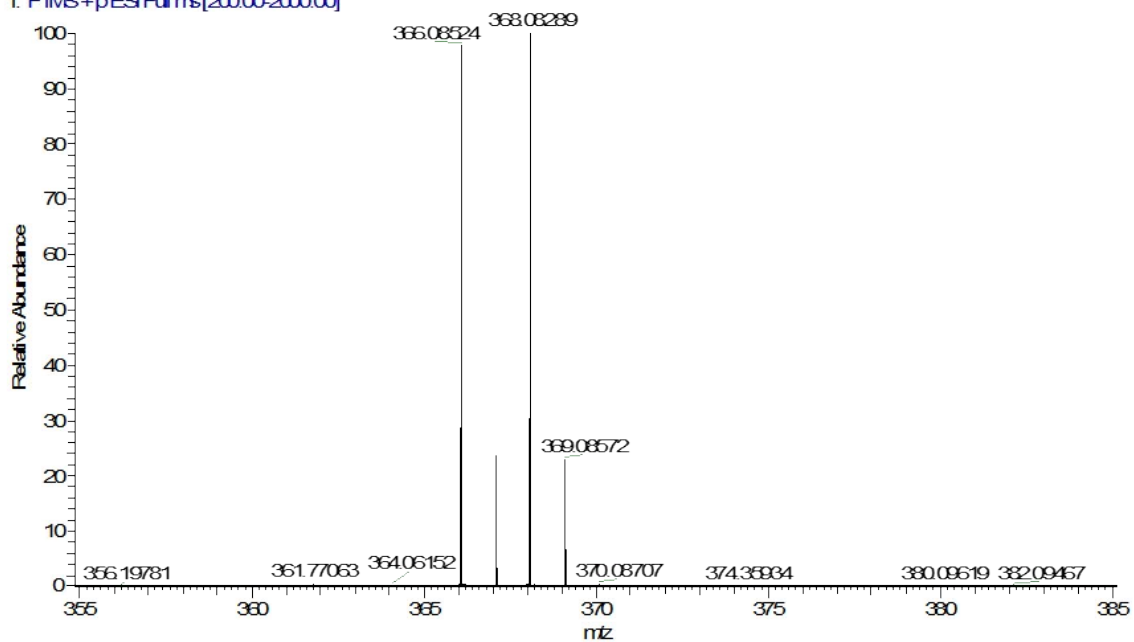

proton NMR for 3g (CDCl<sub>3</sub>, 500MHz)

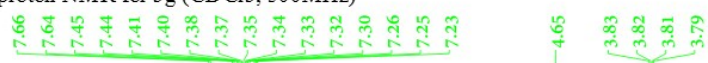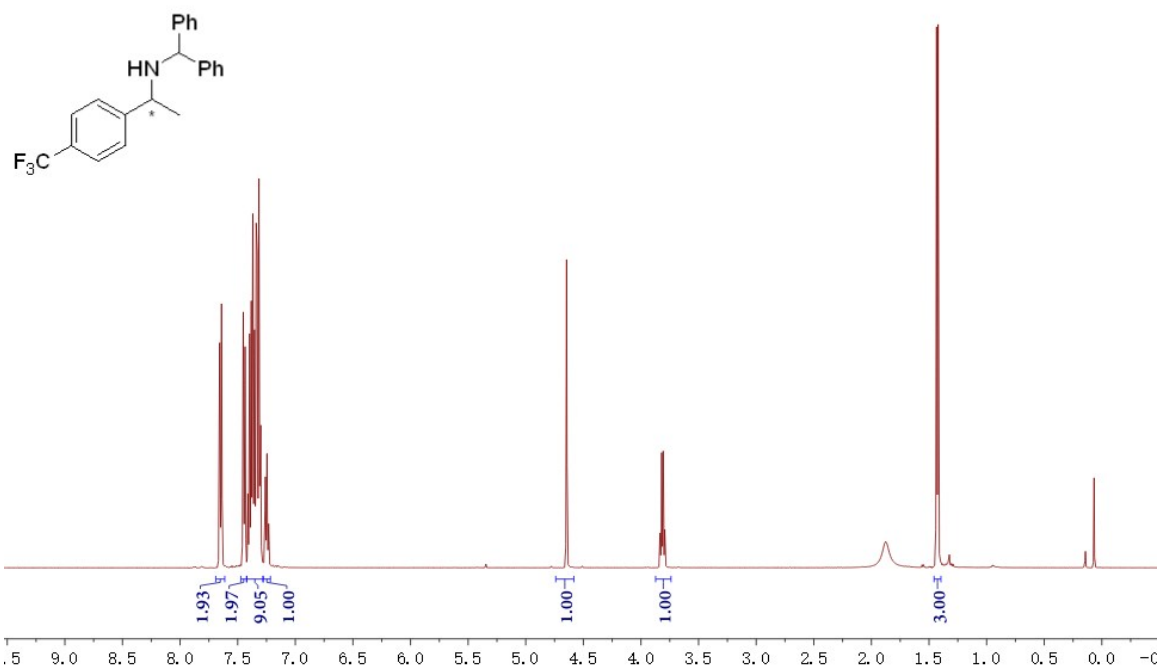

C13 for 3g (CDCl3, 125MHz)

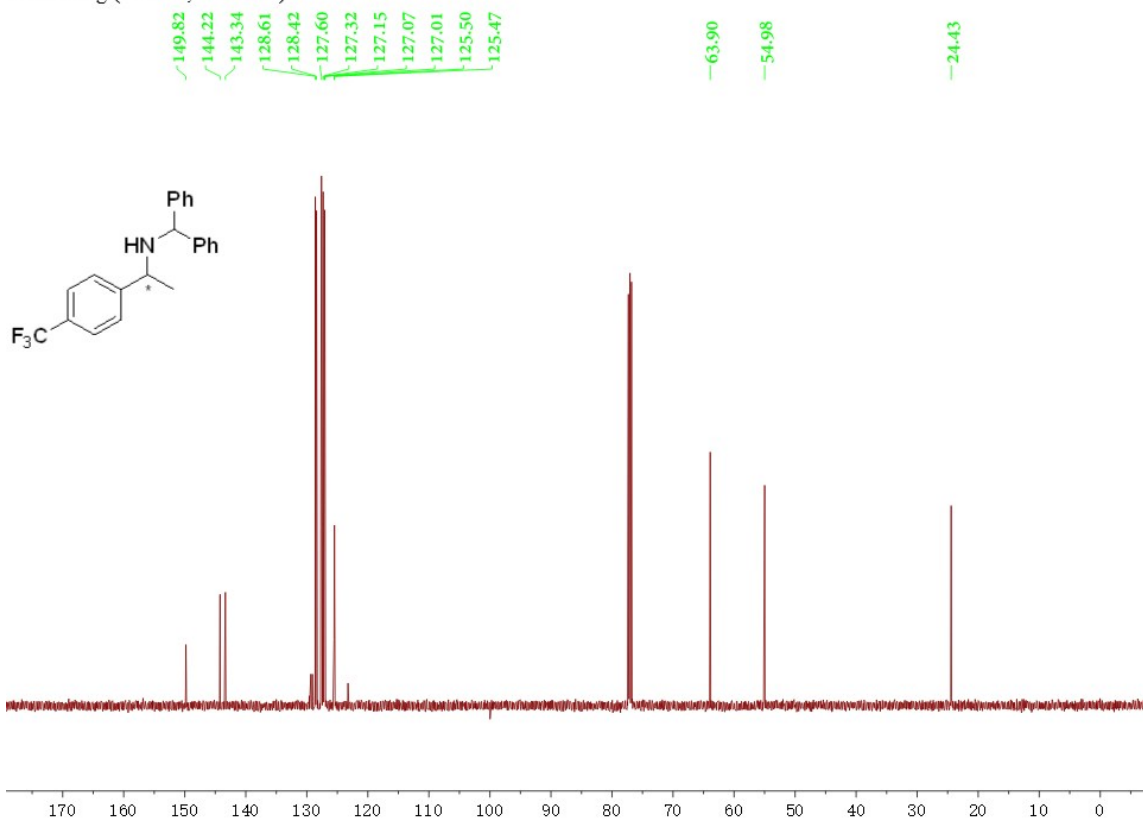

0003 #19 RT: 0.28 AV: 1 NL: 246EB  
T: FTMS+pESI Full ms [200.00-2000.00]

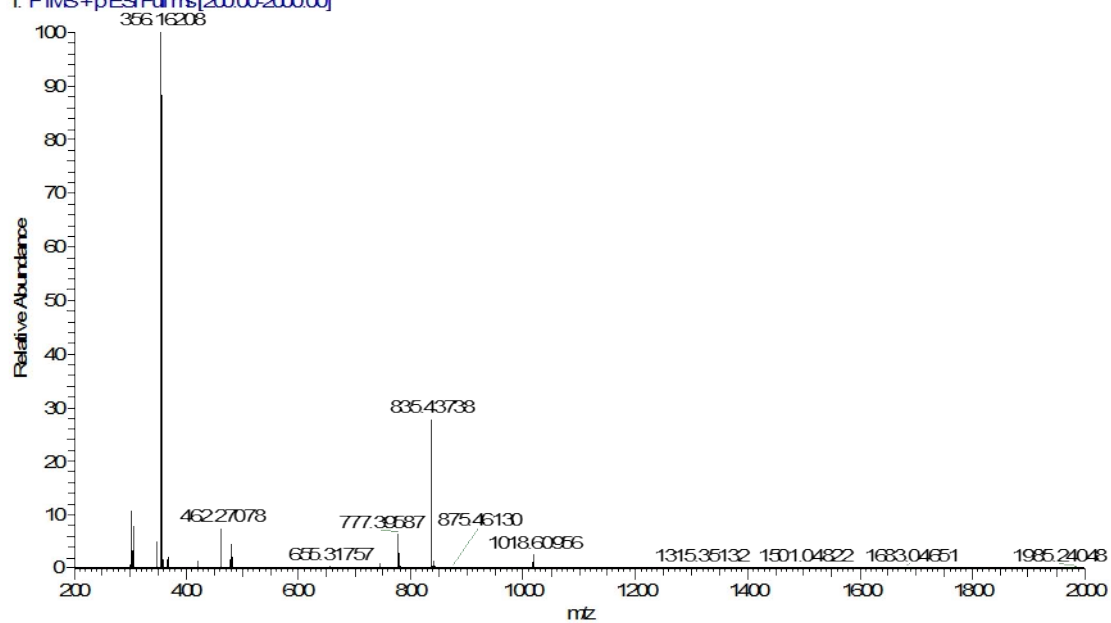

proton NMR for 3h (CDCl<sub>3</sub>, 500MHz)

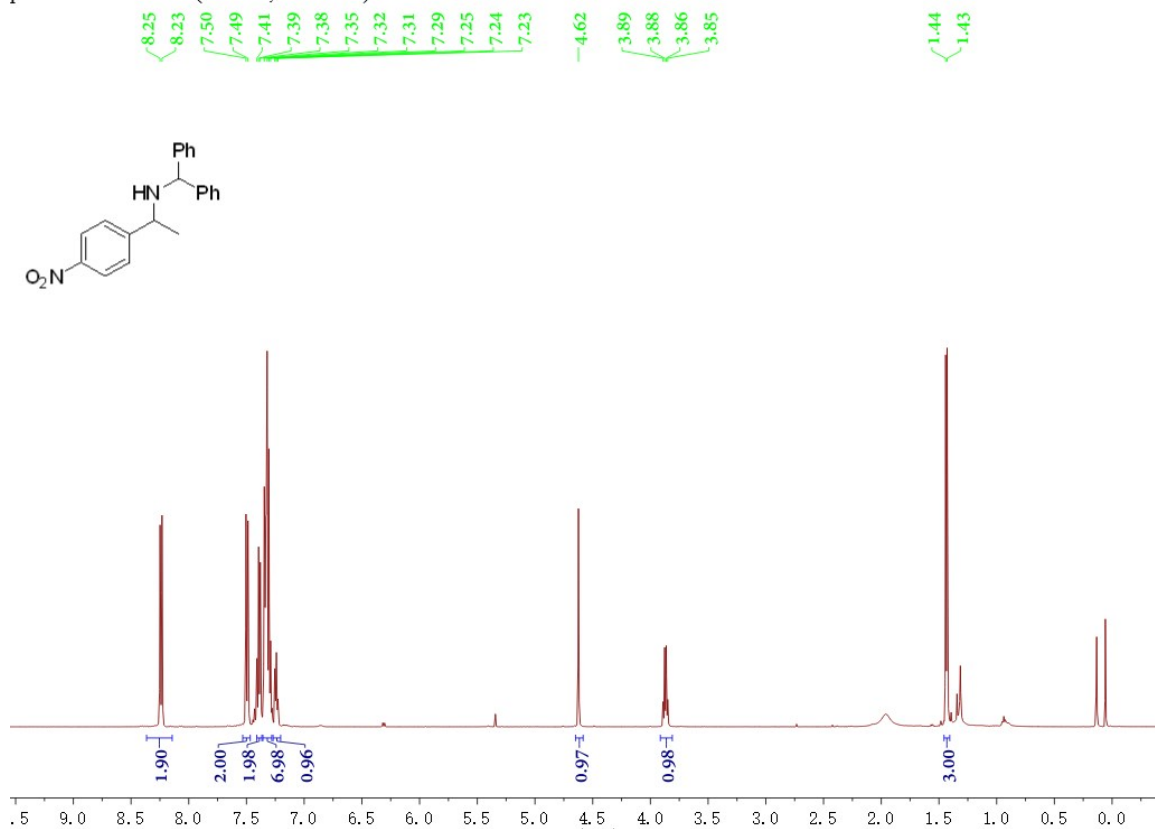

C13 for 3h (CDCl<sub>3</sub>, 125MHz)

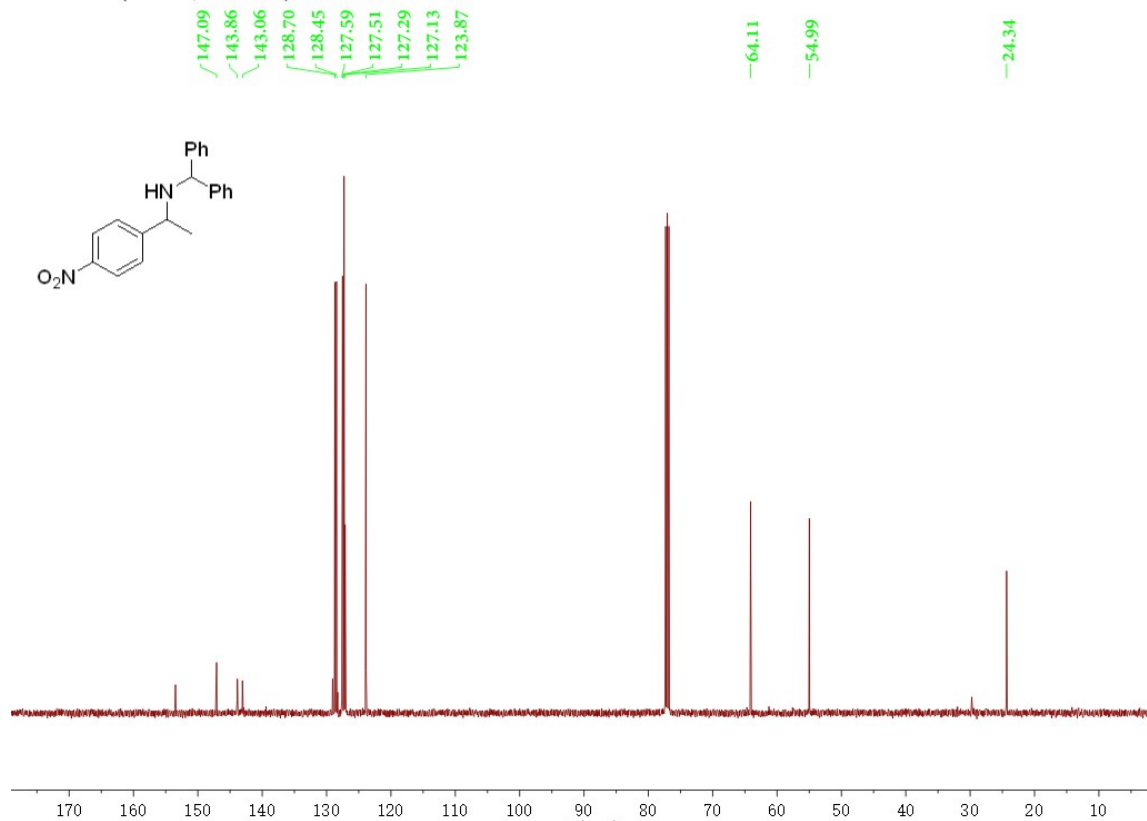

003: #19 RT: 0.28 AV: 1 NL: 1.32EB  
T: FIMS+pESI Full ms [200.00-2000.00]

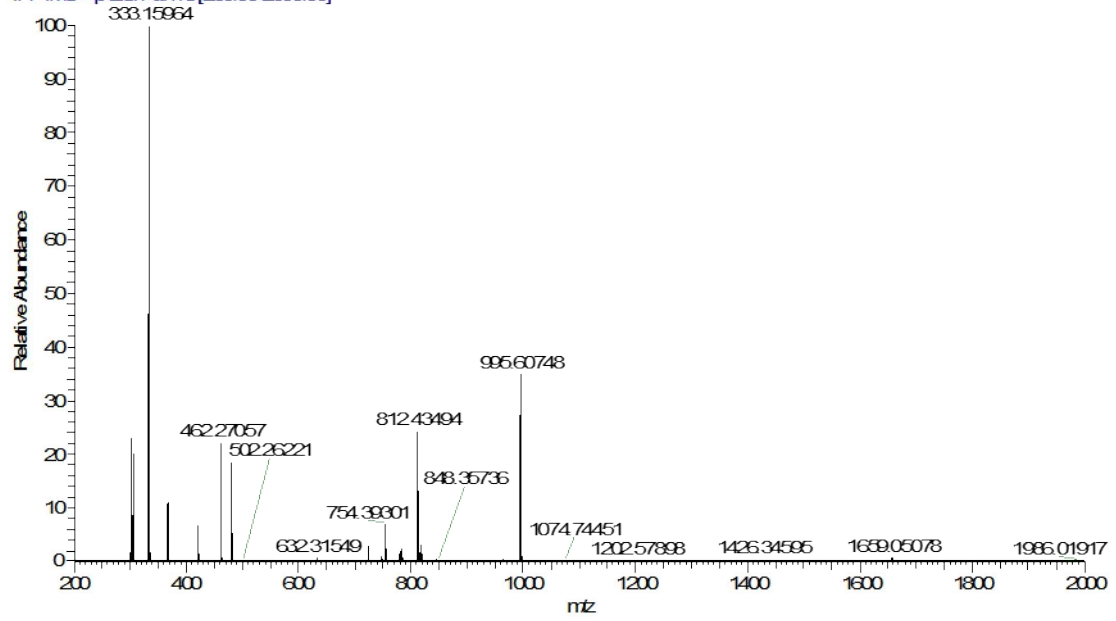

proton NMR for 3i (CDCl<sub>3</sub>, 500MHz)

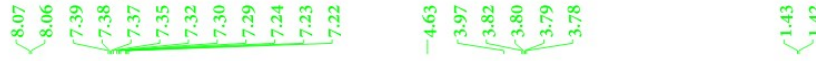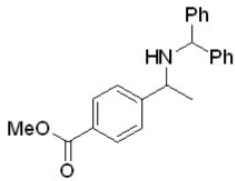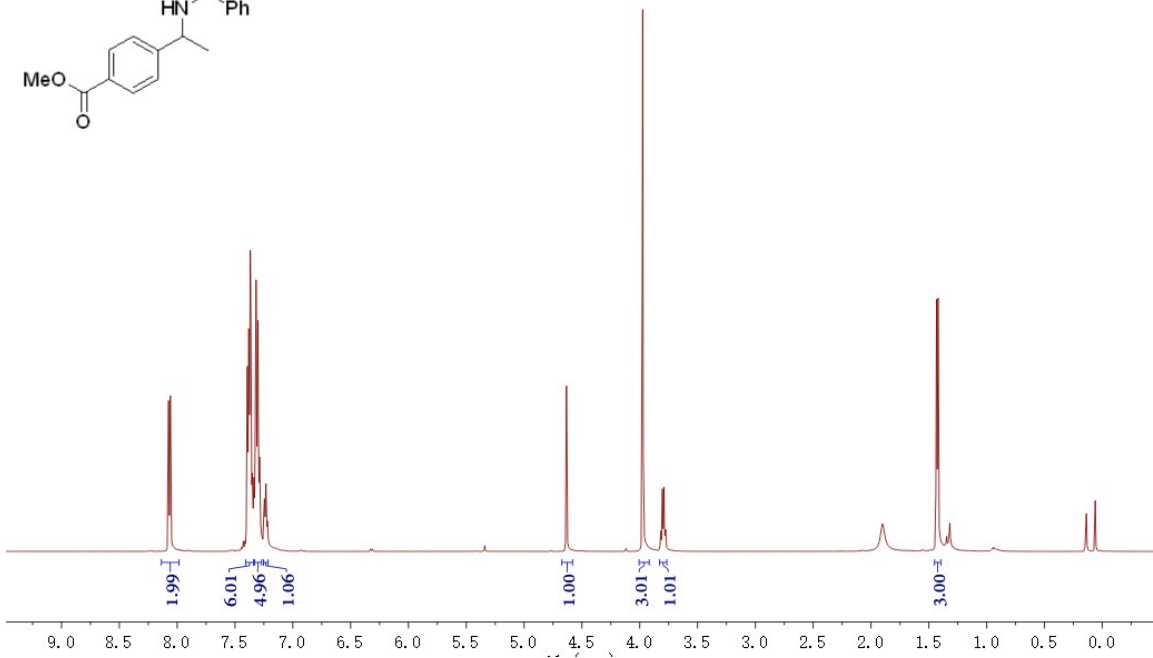

C13 for 3i (CDCl3, 125MHz)

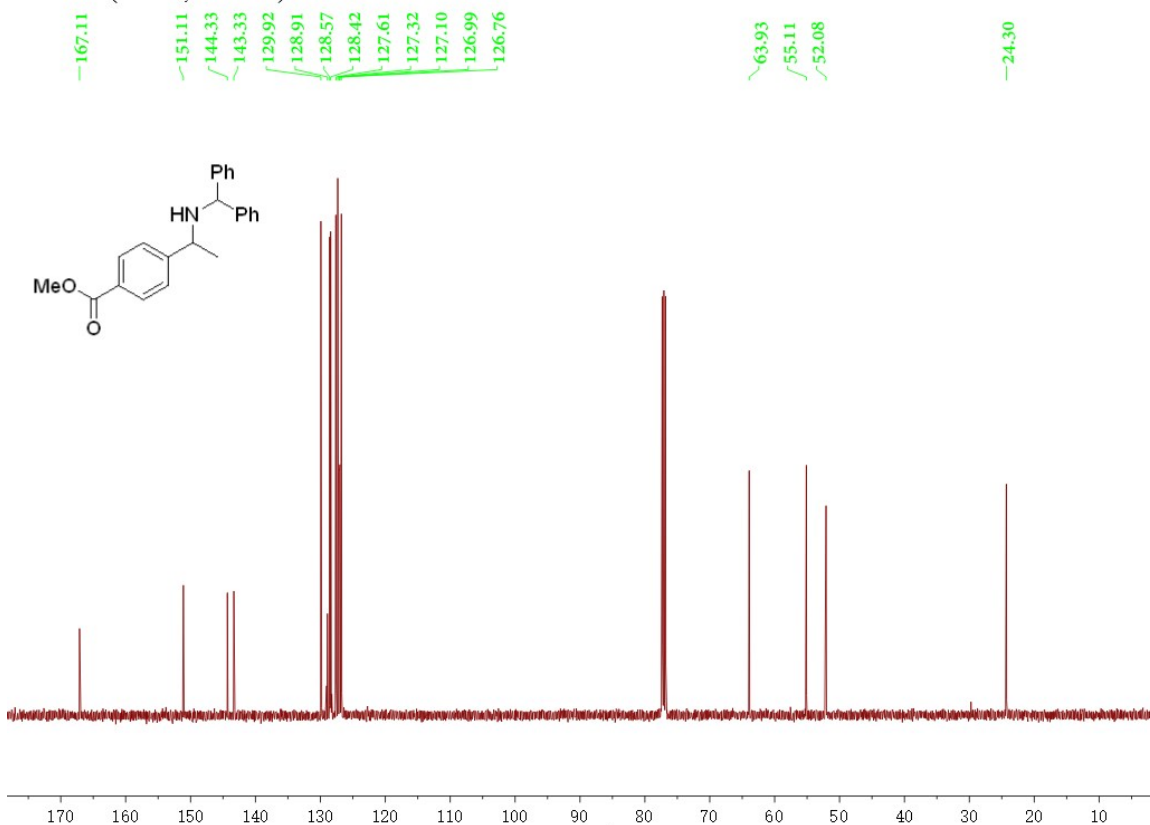

0003E #10 RT: 0.13 AV: 1 NL: 271EB  
T: FTMS+pESI Full ms [200.00-2000.00]

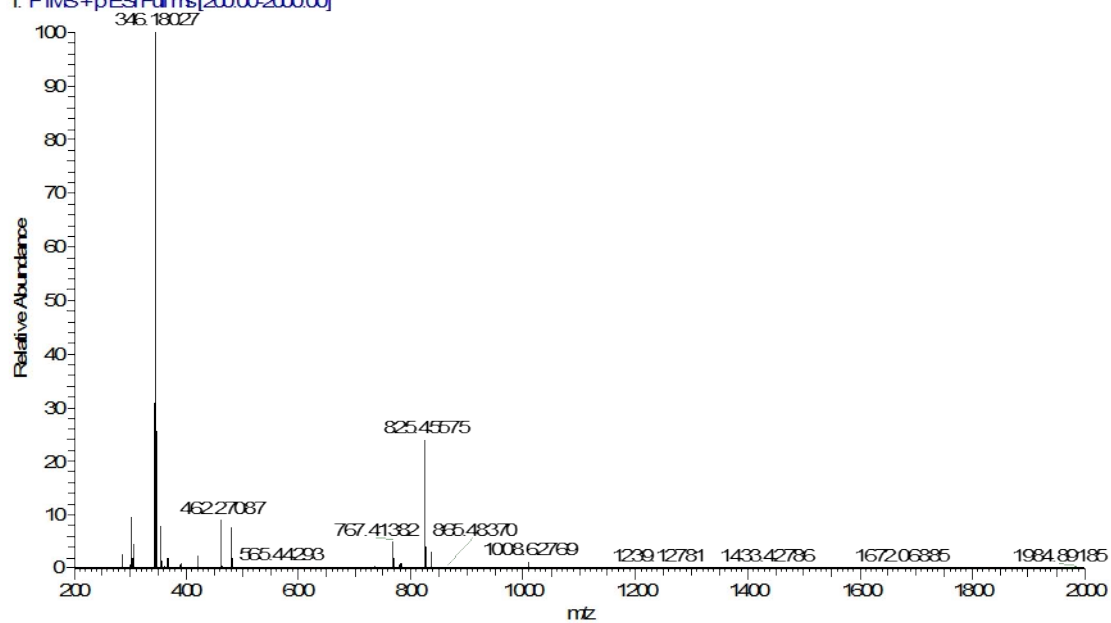

proton NMR for 3j (CDCl<sub>3</sub>, 500MHz)

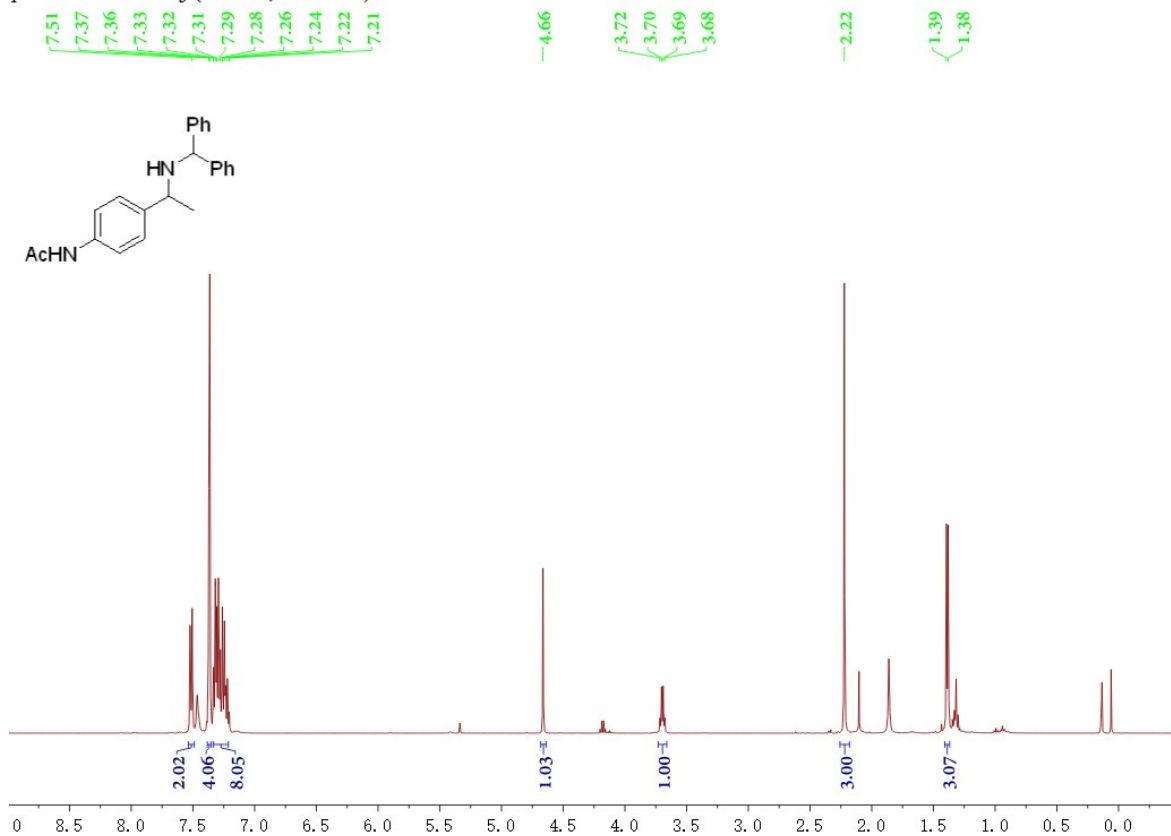

C13 for 3j (CDCl<sub>3</sub>, 125MHz)

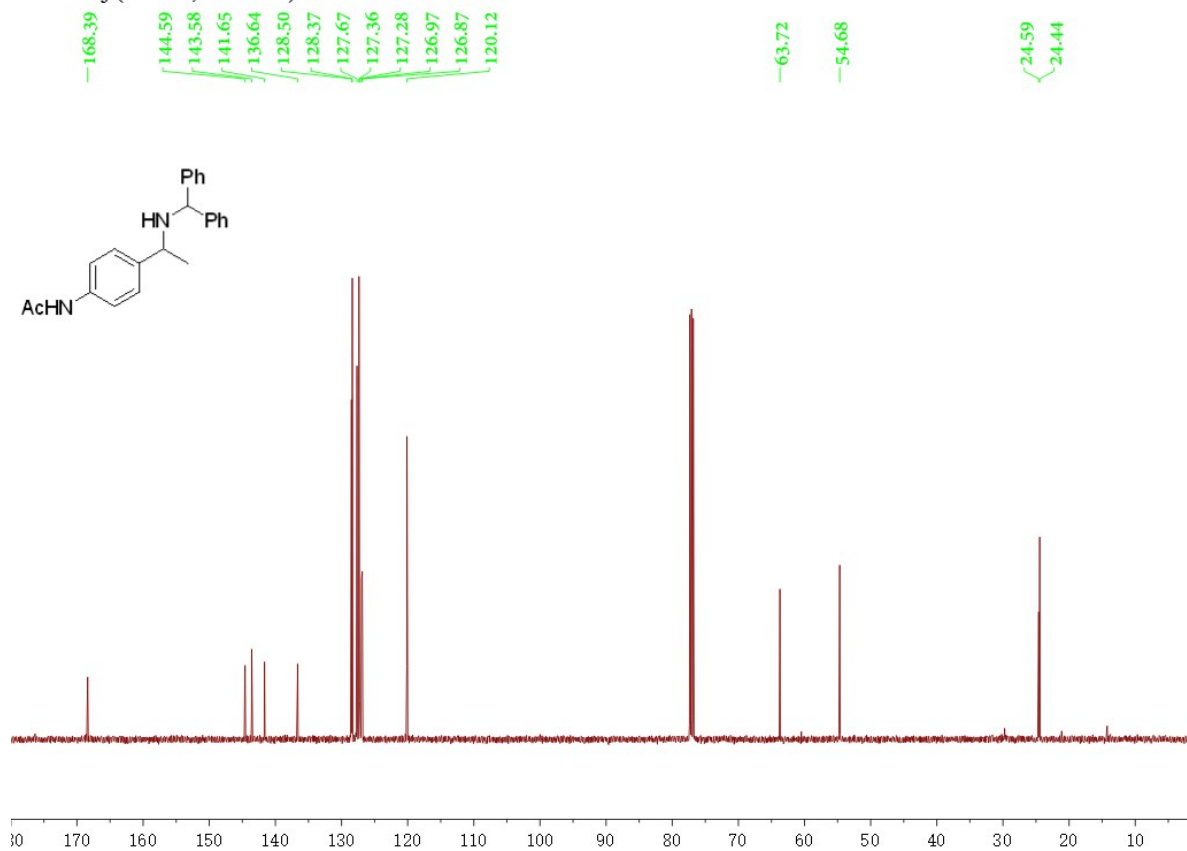



003E #26 RT: 0.40 AV: 1 NL: 1.50EB  
T: FTMS+pESI Full ms [200.00-2000.00]

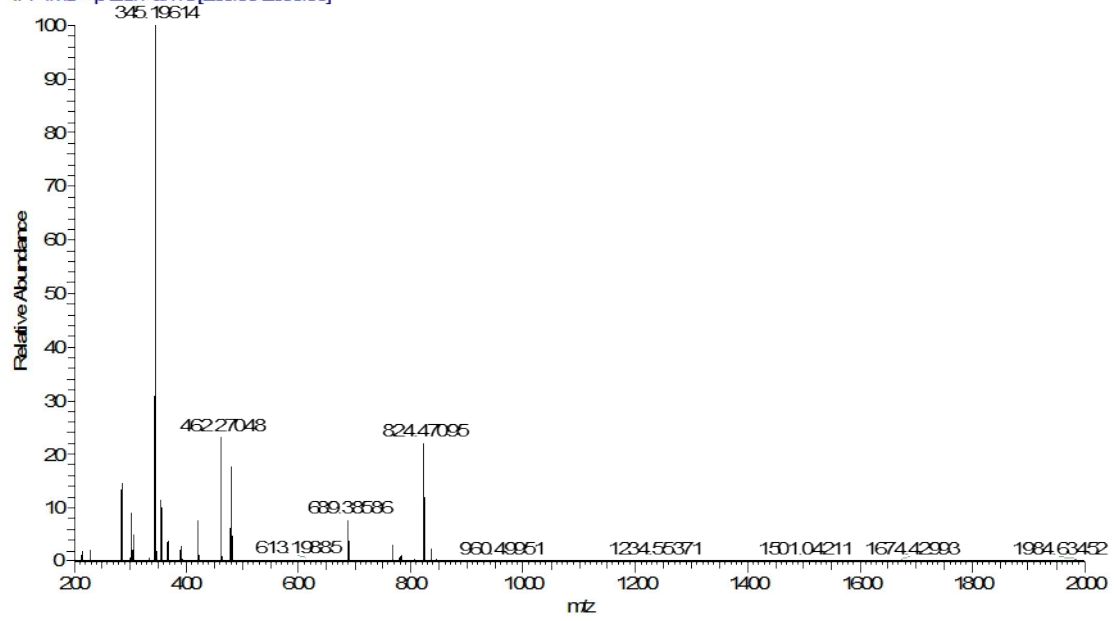

Proton NMR for 3k (CDCl<sub>3</sub>, 500MHz)

7.63 7.61 7.58 7.57 7.55 7.53 7.41 7.39 7.38 7.38 7.37 7.35 7.31 7.29 7.27 7.26 5.20 4.25 4.23 4.22 3.04 3.03 3.02 3.02 3.01 3.00 2.84 2.82 2.81 2.79 2.55 2.54 2.53 2.52 2.52 2.52 1.90 1.89 1.88 1.86

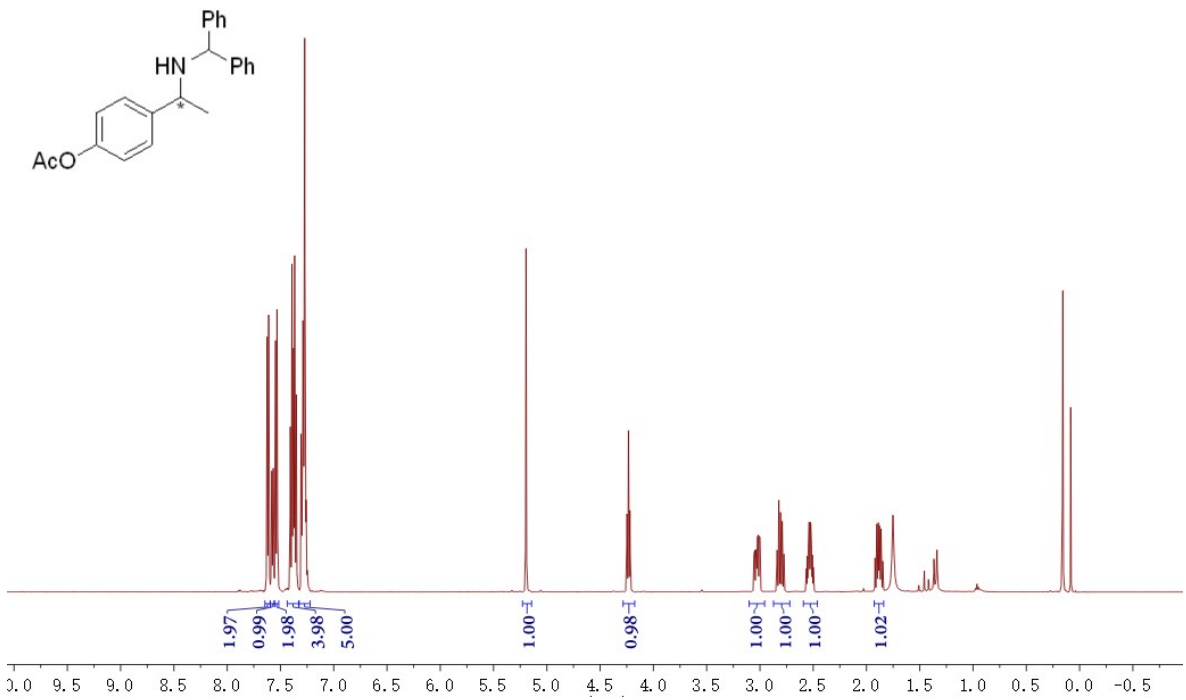

C13 for 3k (CDCl3, 125MHz)

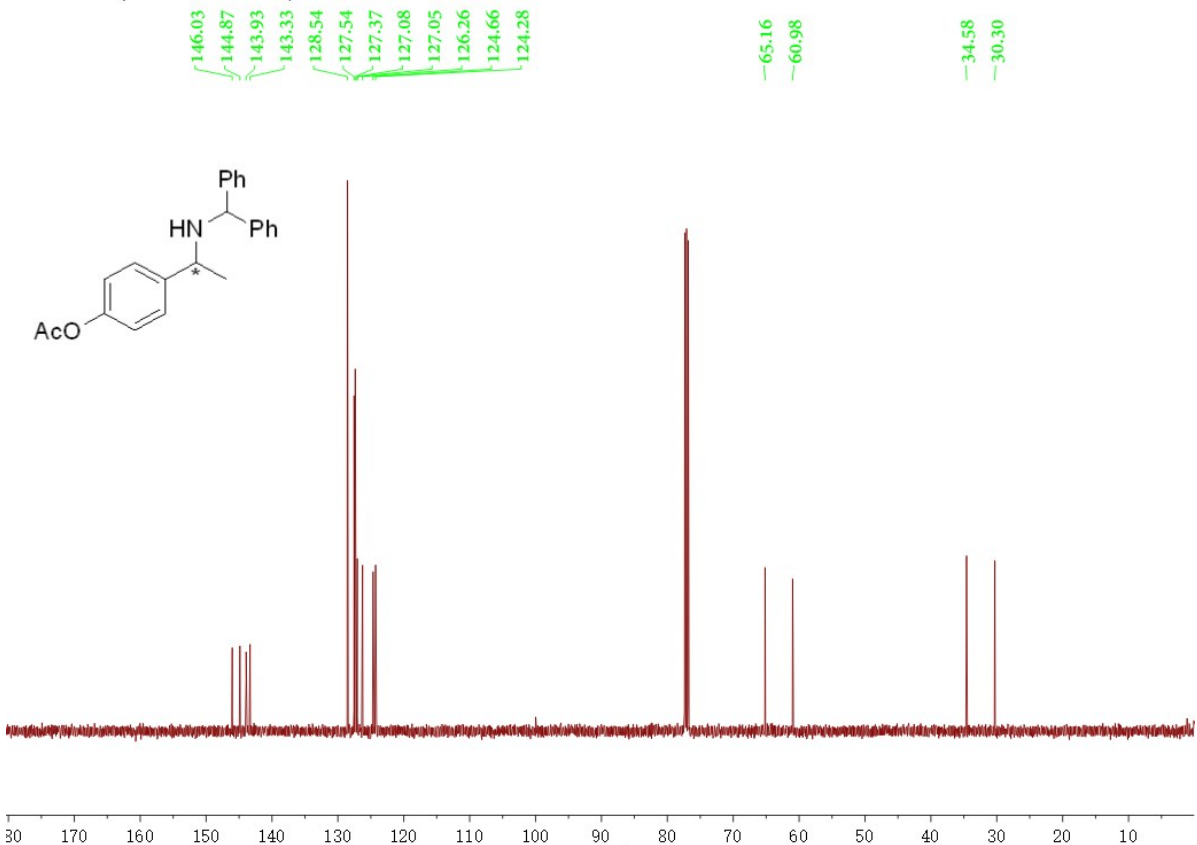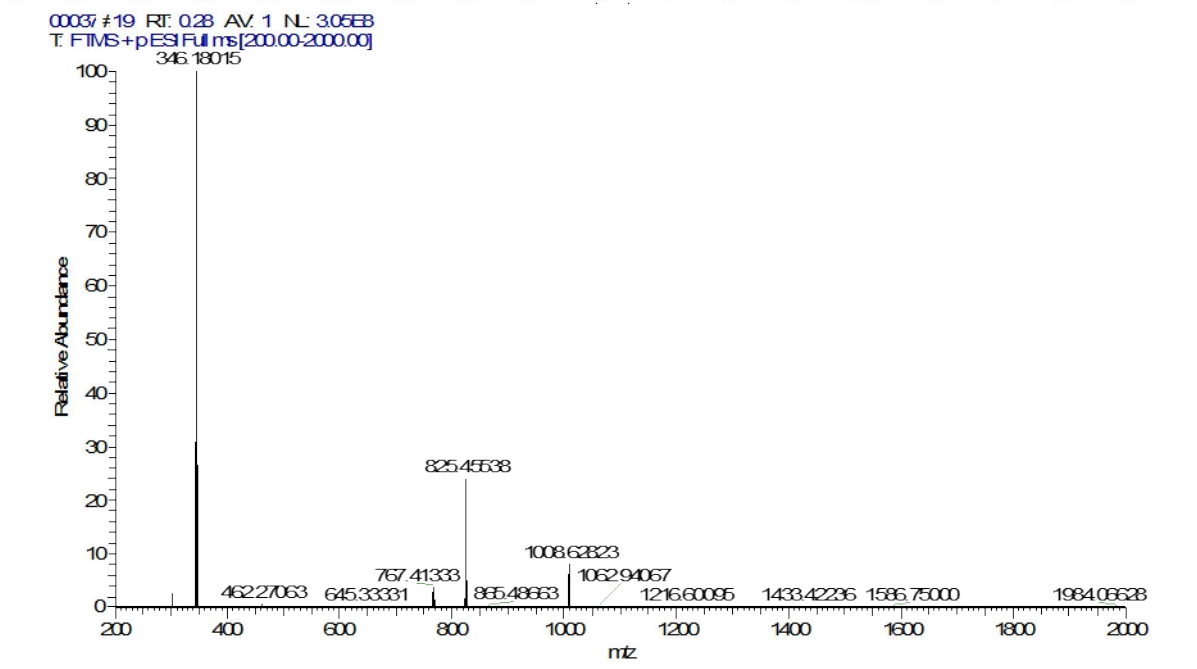

proton NMR for 31 (CDCl<sub>3</sub>, 500MHz)

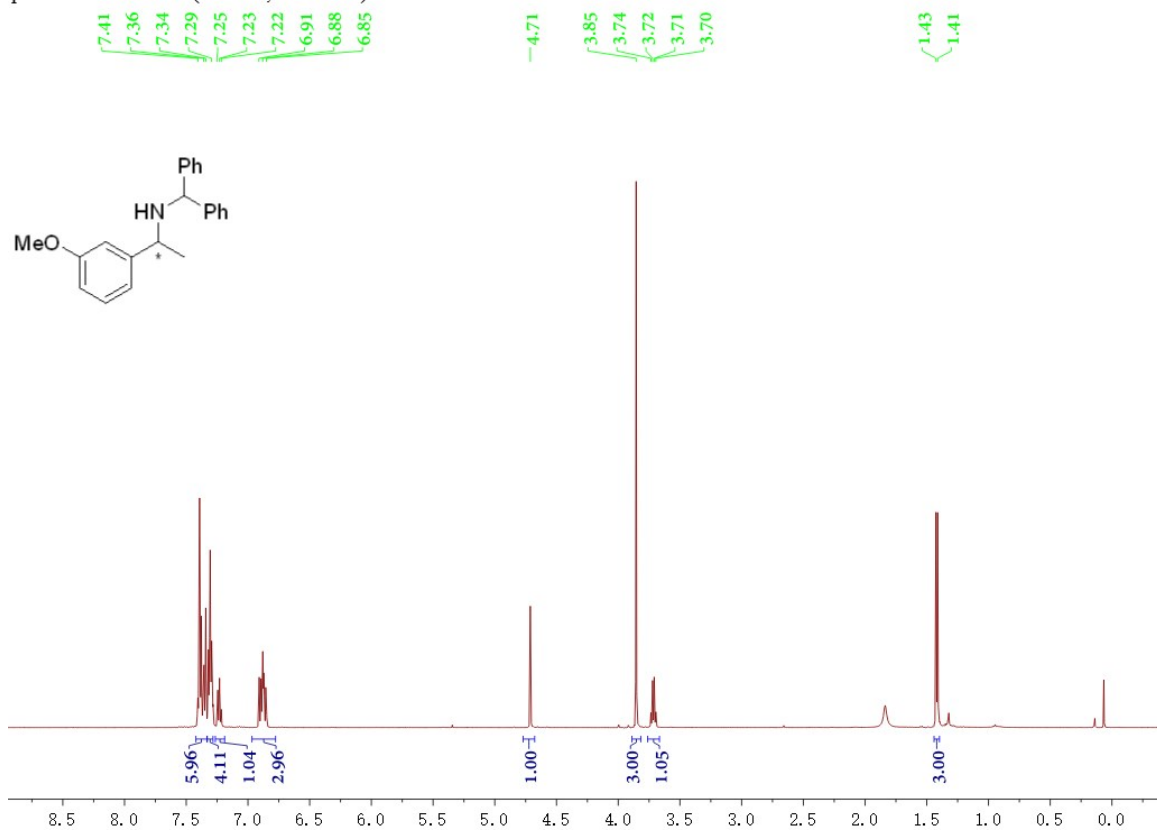

C13 for 31 (CDCl<sub>3</sub>, 125MHz)

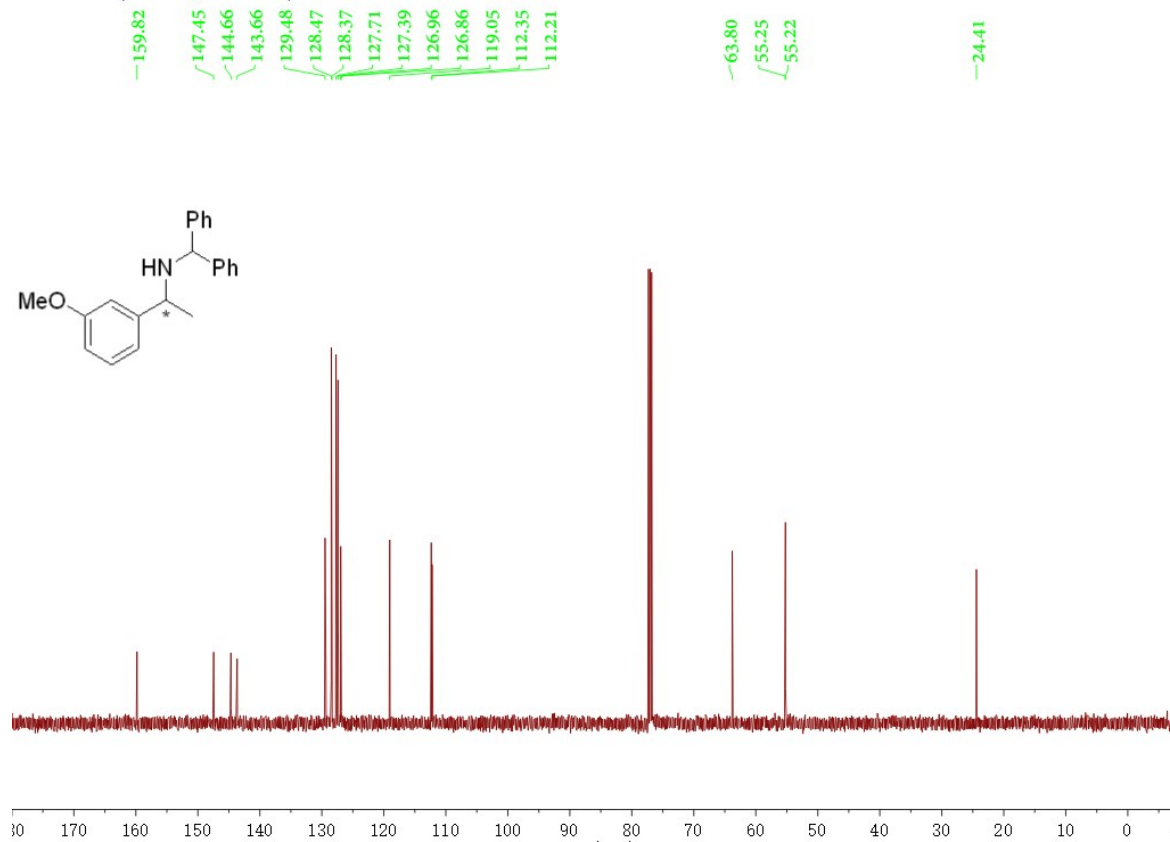

00087 #5 RT: 0.12 AV: 1 NL: 8.95E7  
T: FTMS + p ESI Full ms [150.00-2000.00]

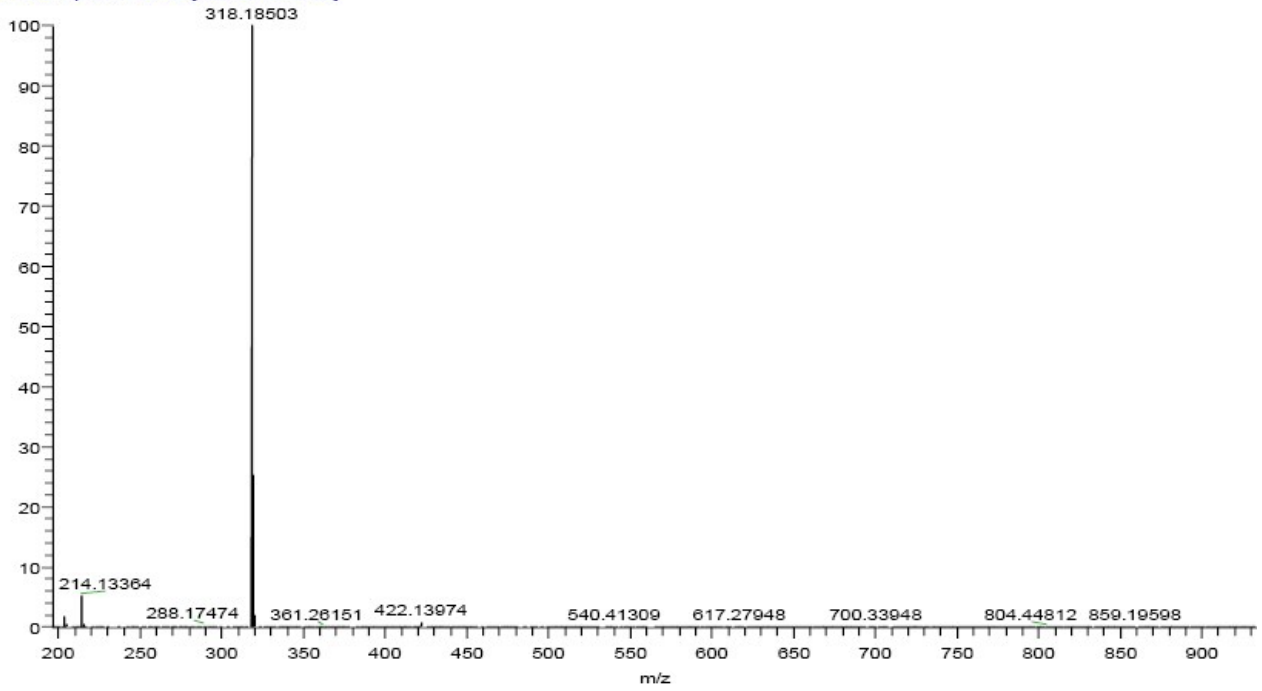

proton NMR for 3m (CDCl<sub>3</sub>, 500MHz)

7.41 7.40 7.38 7.36 7.34 7.33 7.32 7.31 7.30 7.26 7.25 7.23 7.20 7.19 -4.69 3.74 3.73 3.72 3.71 1.42 1.41

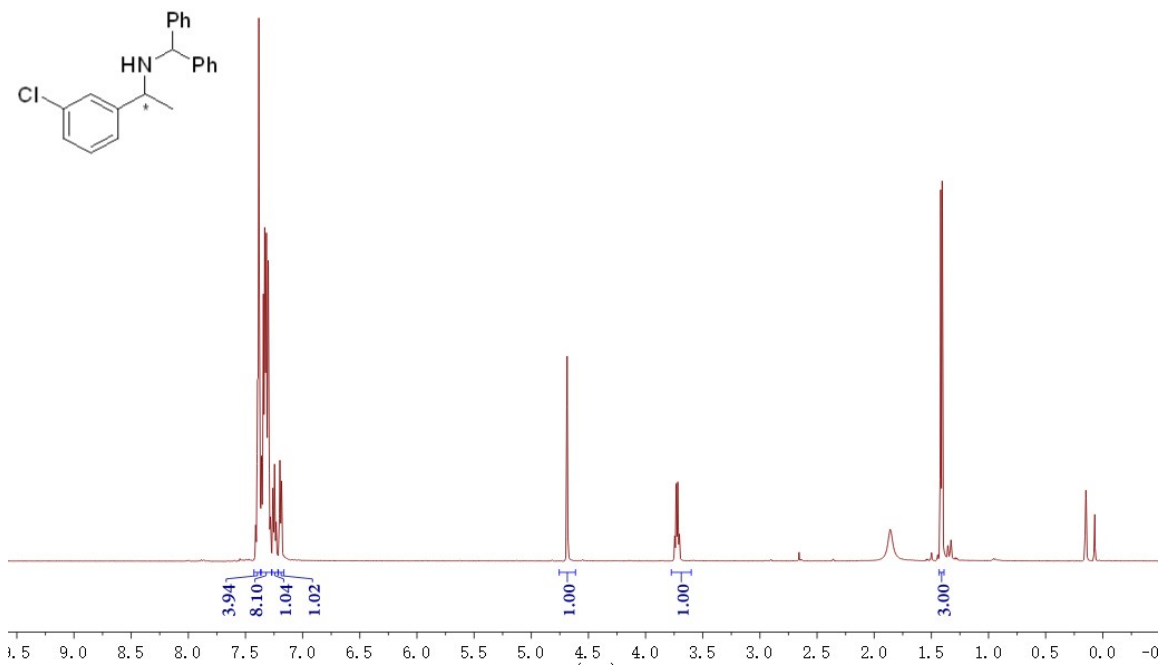

C13 for 3m (CDCl3, 125MHz)

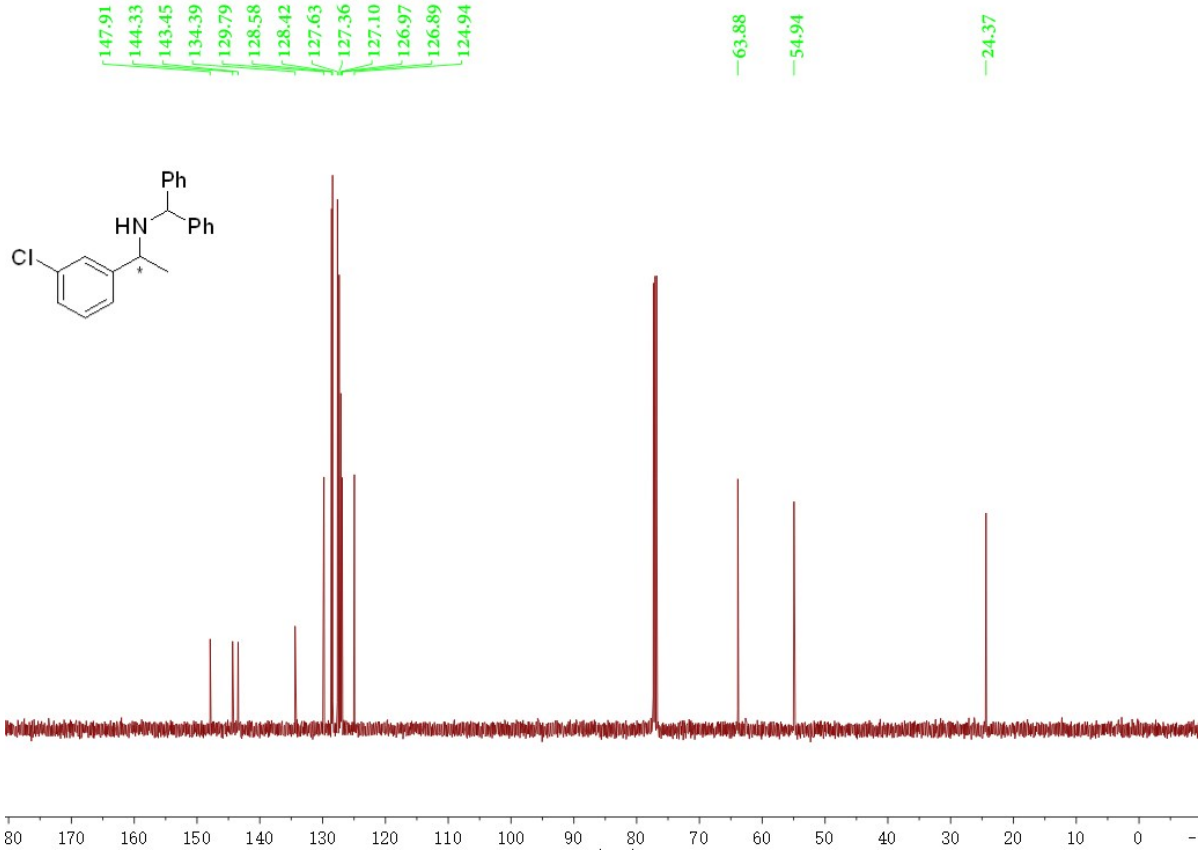

00084 #26 RT: 0.77 AV: 1 NL: 6.47E6  
T: FTMS + p ESI Full ms [150.00-2000.00]

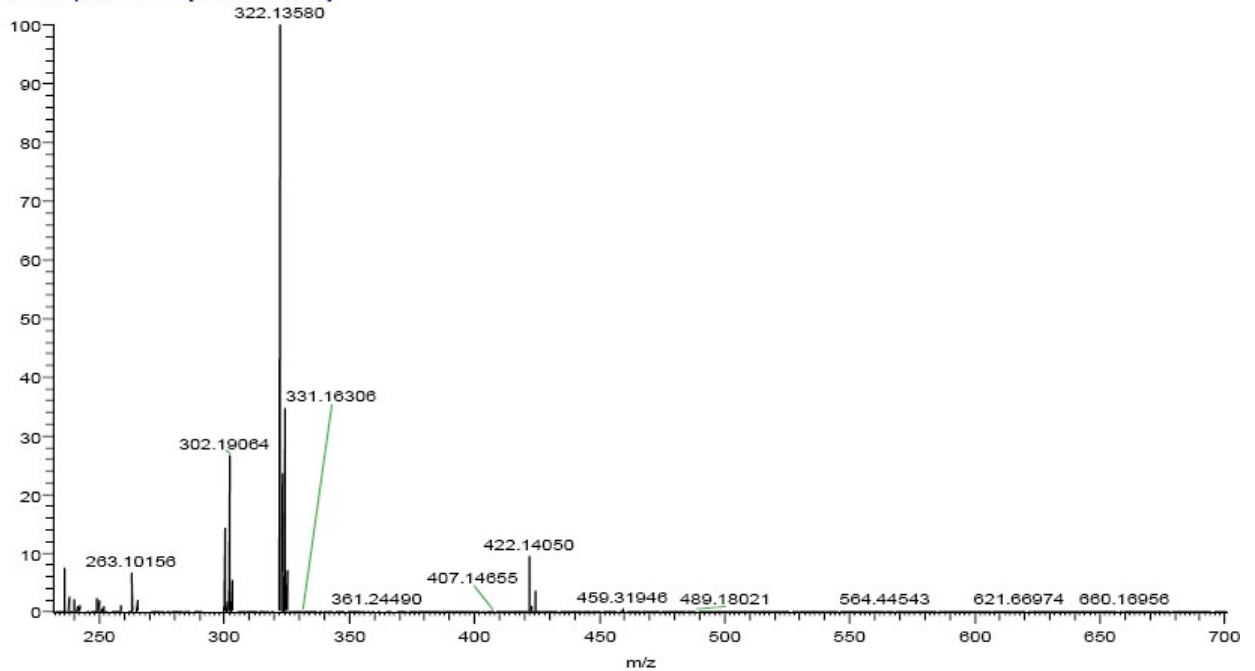

proton NMR for 3n (CDCl<sub>3</sub>, 500MHz)

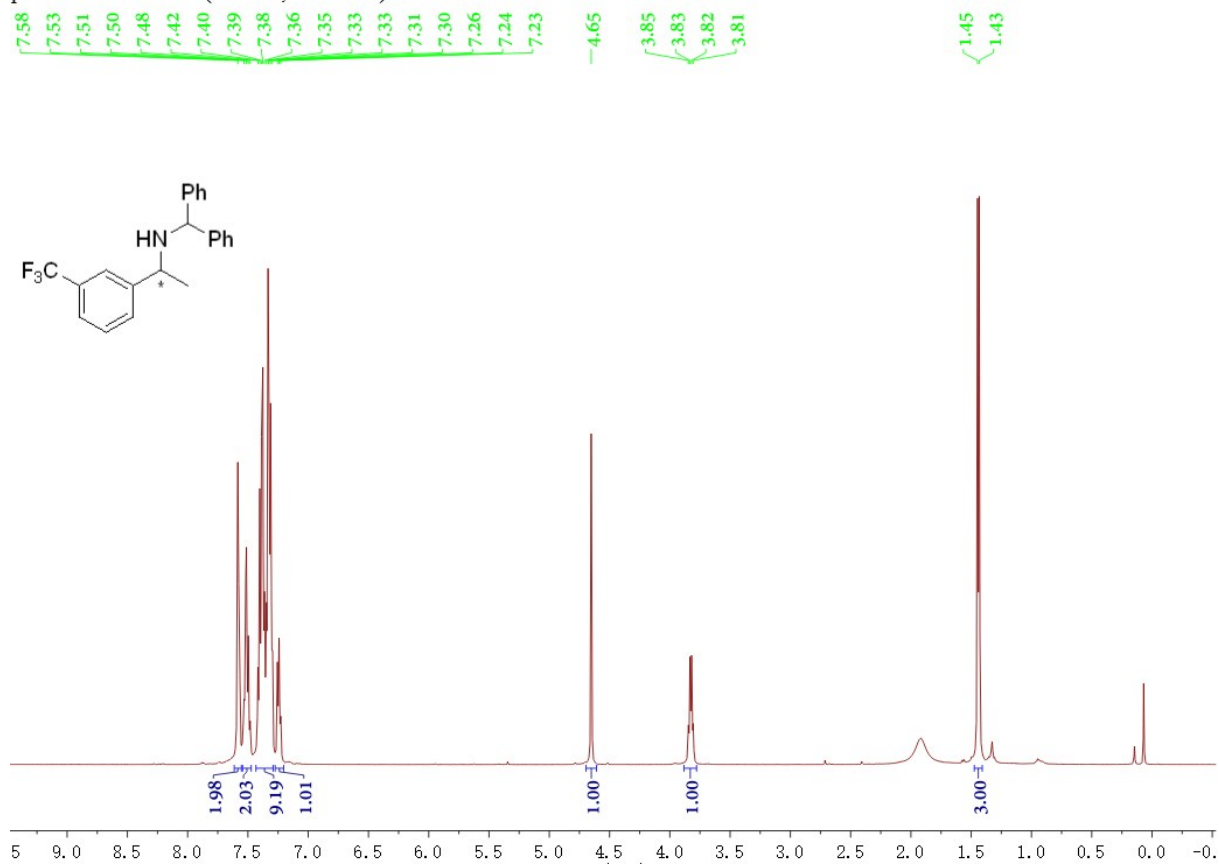

C13 for 3n (CDCl<sub>3</sub>, 125MHz)

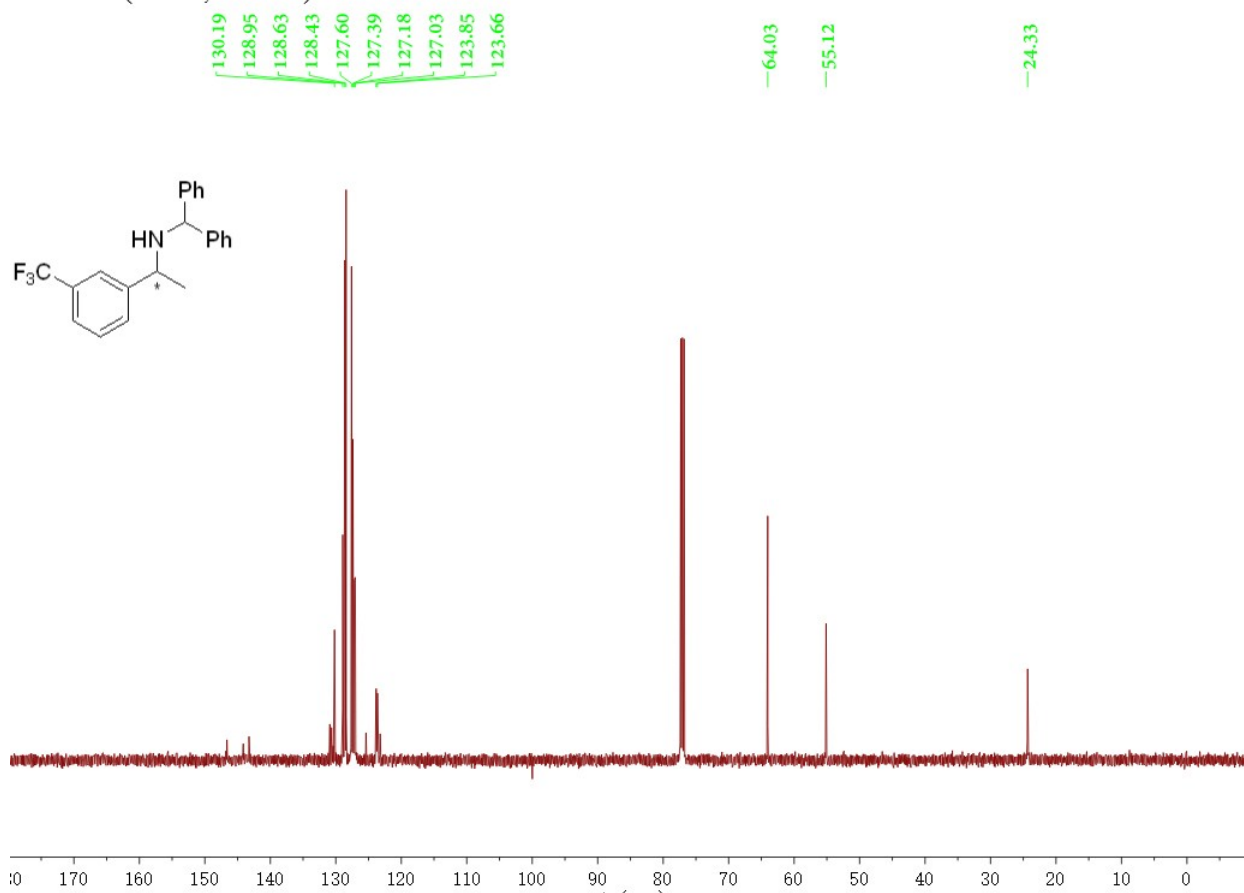

003E #18 RT: 0.26 AV: 1 NL: 261EB  
T: FIMS+pESI Full ms [200.00-2000.00]

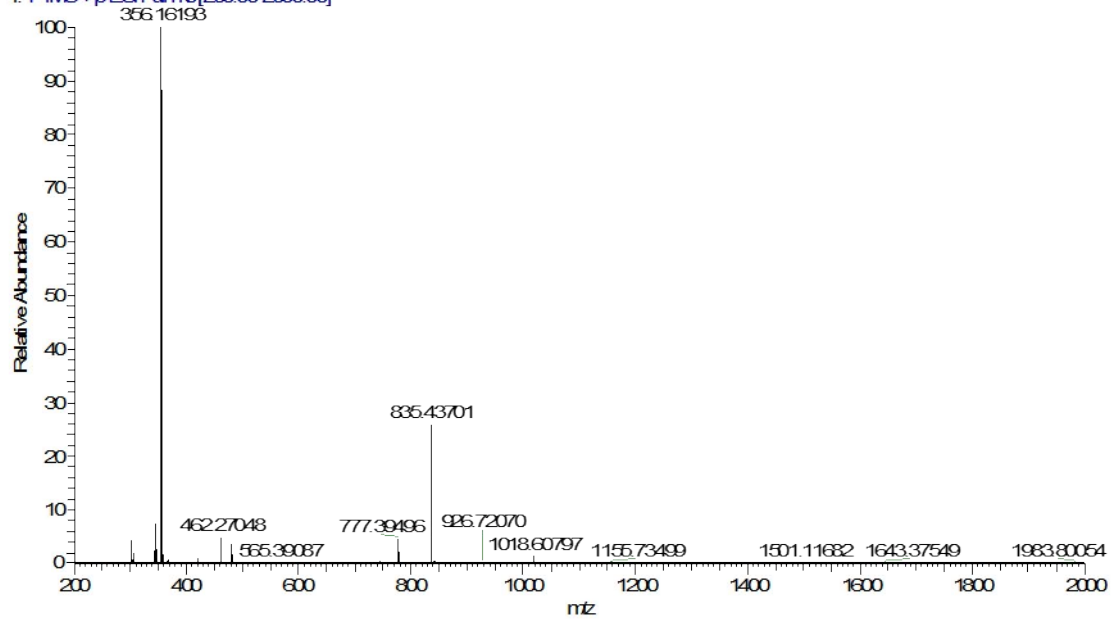

proton NMR for 3o' (CDCl<sub>3</sub>, 500MHz)

7.50  
7.49  
7.37  
7.31  
7.30  
7.29  
7.26  
7.24  
7.22  
6.91  
6.91  
6.90  
6.89  
-5.30  
-2.40  
-2.02

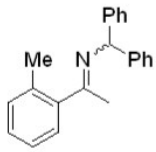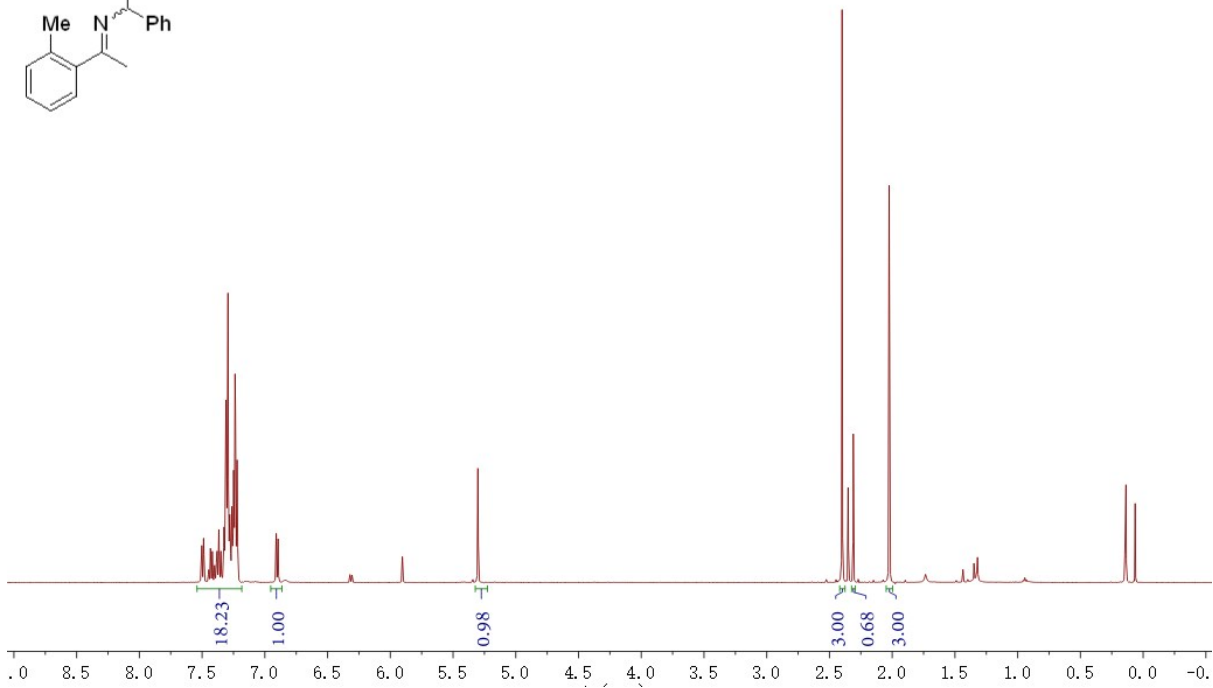

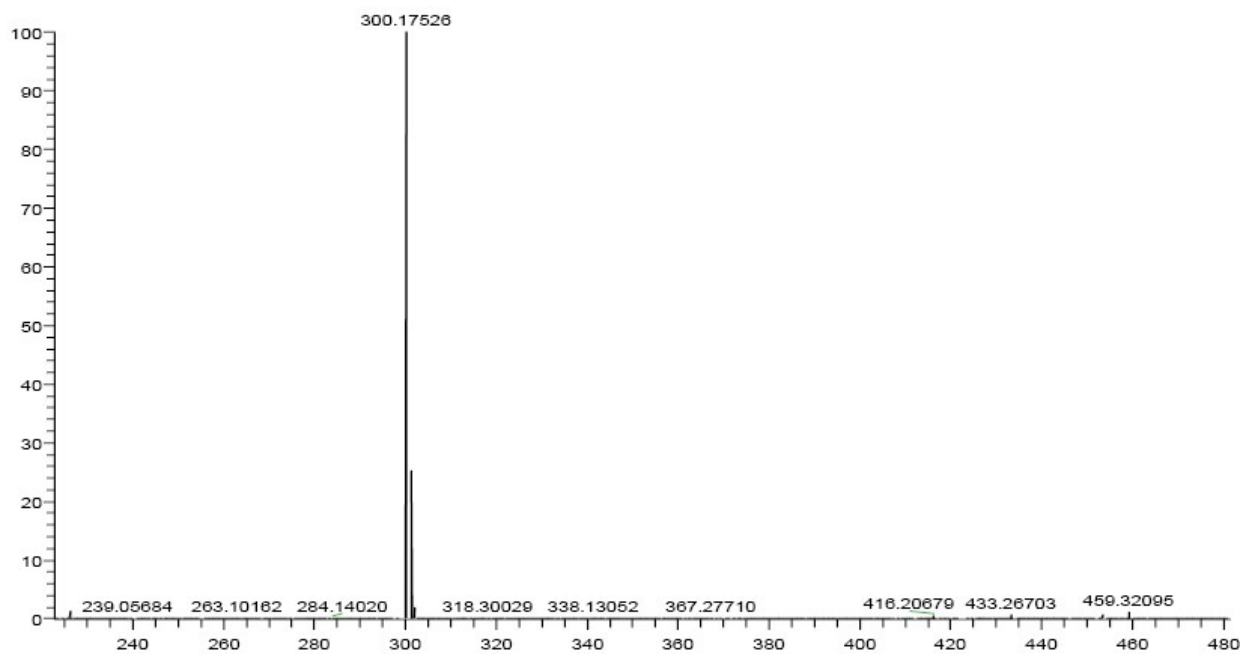

proton NMR for 3p' (CDCl<sub>3</sub>, 500MHz)

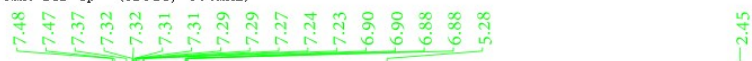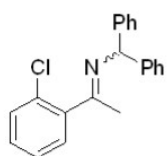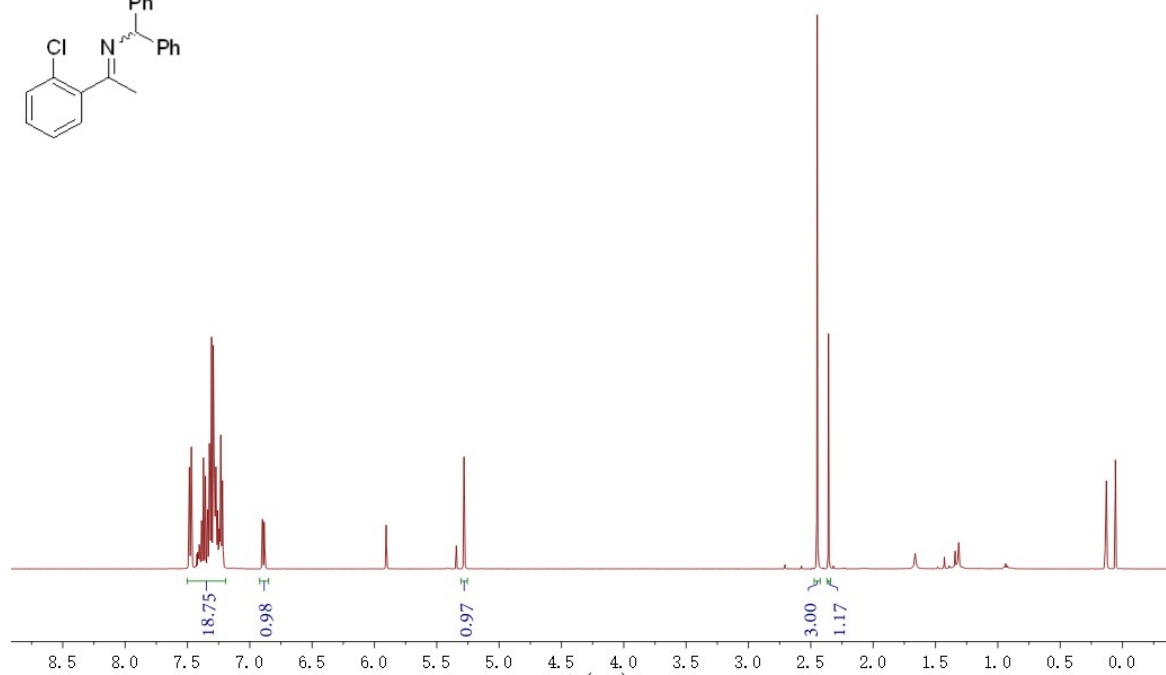



003 #31 RT: 0.48 AV: 1 NL: 6.56E7  
T: FIMS+pESI Full ms [200.00-2000.00]

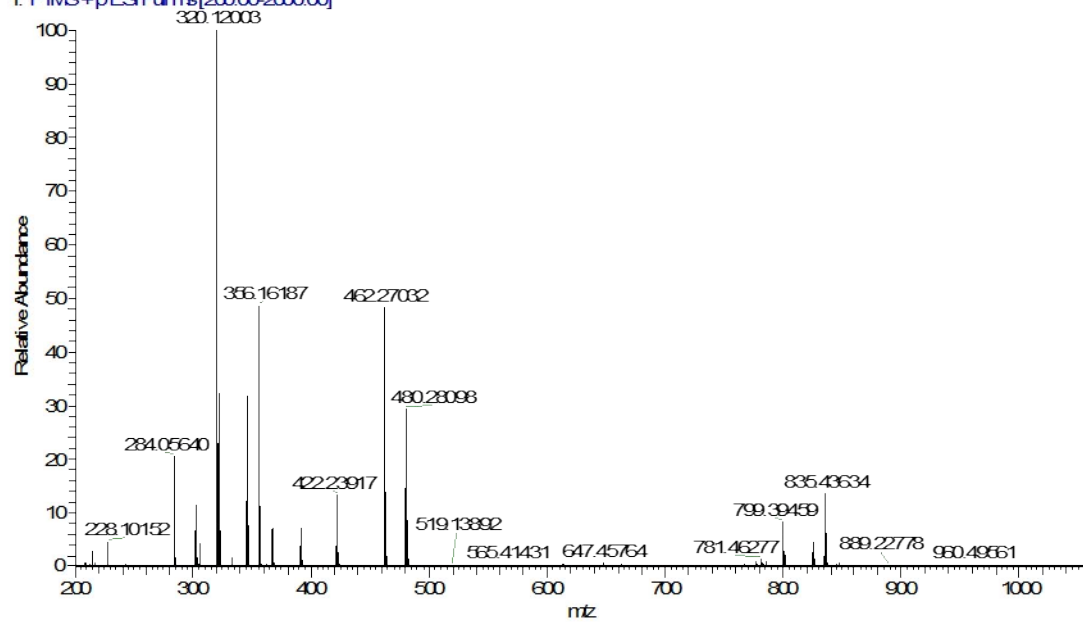

proton NMR for 3q (CDCl<sub>3</sub>, 500MHz)

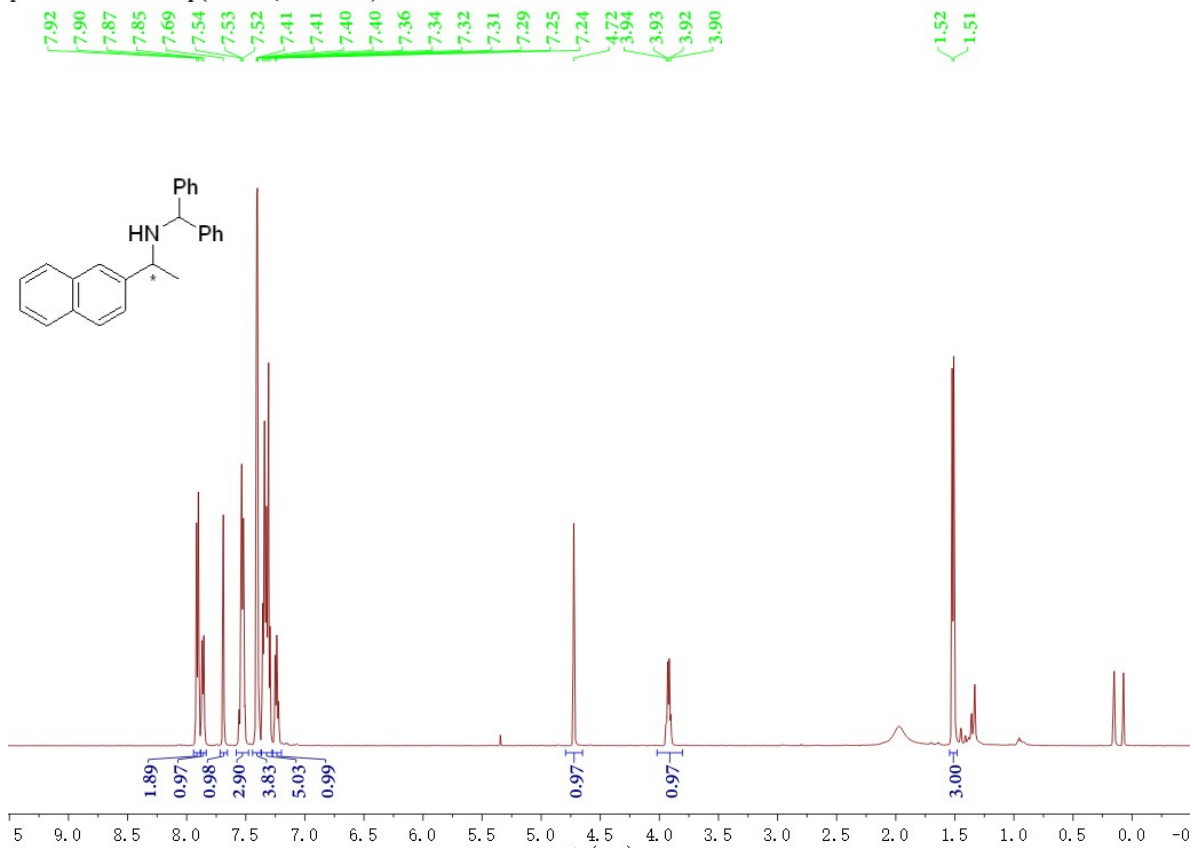

C13 for 3q (CDCl3, 125MHz)

144.65  
143.62  
142.96  
133.51  
132.87  
128.52  
128.40  
127.81  
127.71  
127.40  
127.00  
126.89  
126.00  
125.51  
124.84  
63.83  
55.37  
24.42

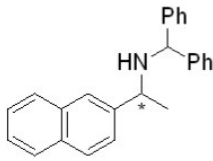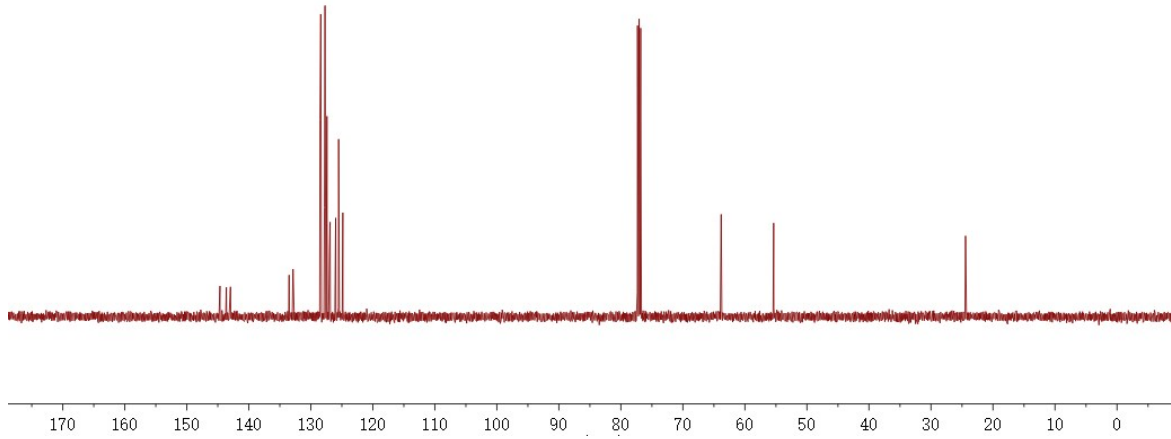

00089 #3 RT: 0.07 AV: 1 NL: 3.90E7  
T: FTMS + p ESI Full ms [150.00-2000.00]

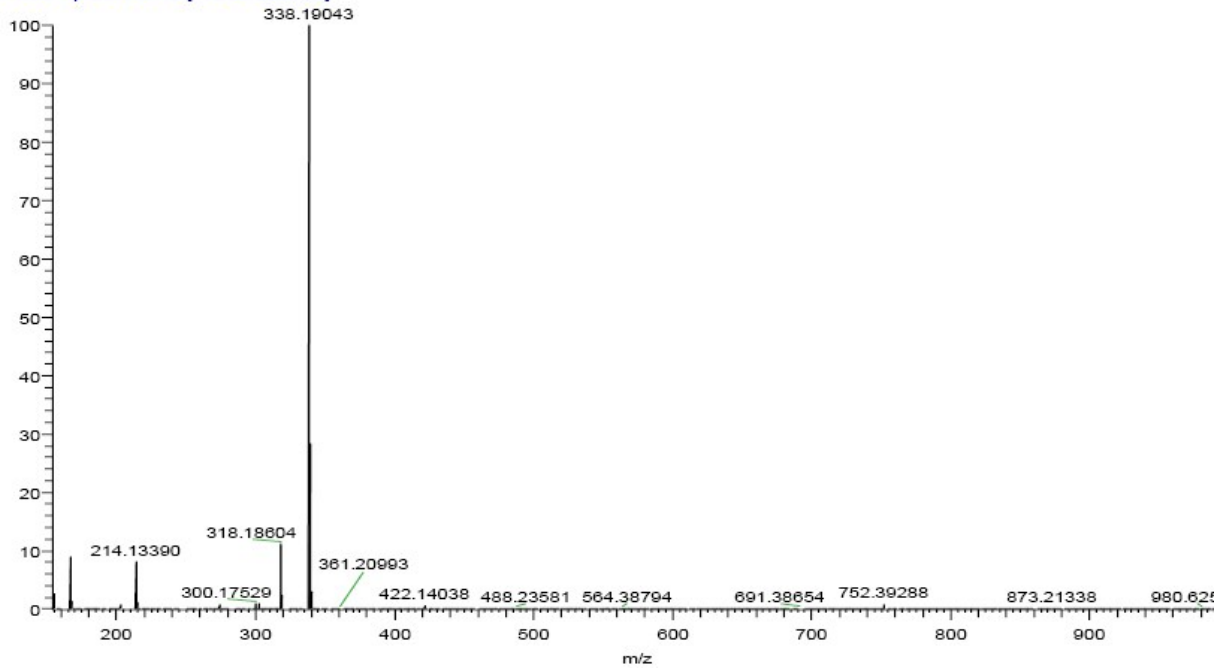

proton NMR for 3r (CDCl<sub>3</sub>, 500MHz)

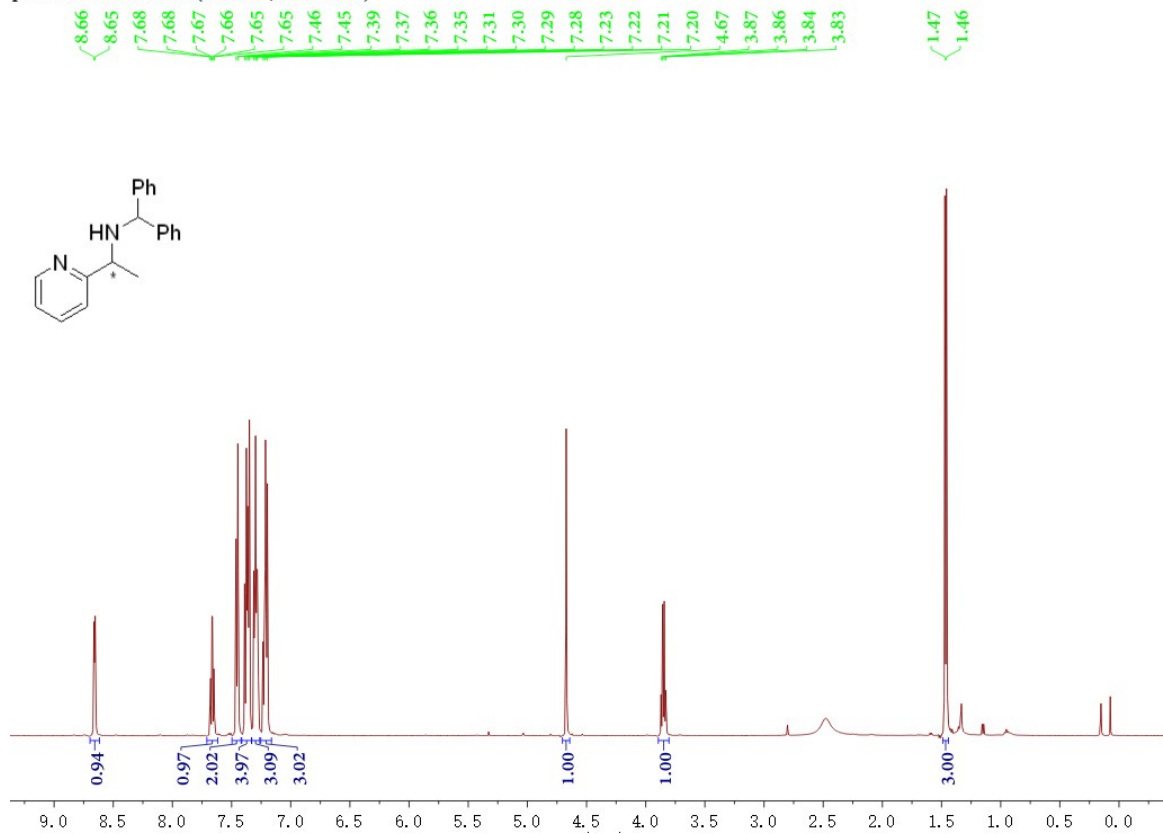

C13 for 3r (CDCl<sub>3</sub>, 125MHz)

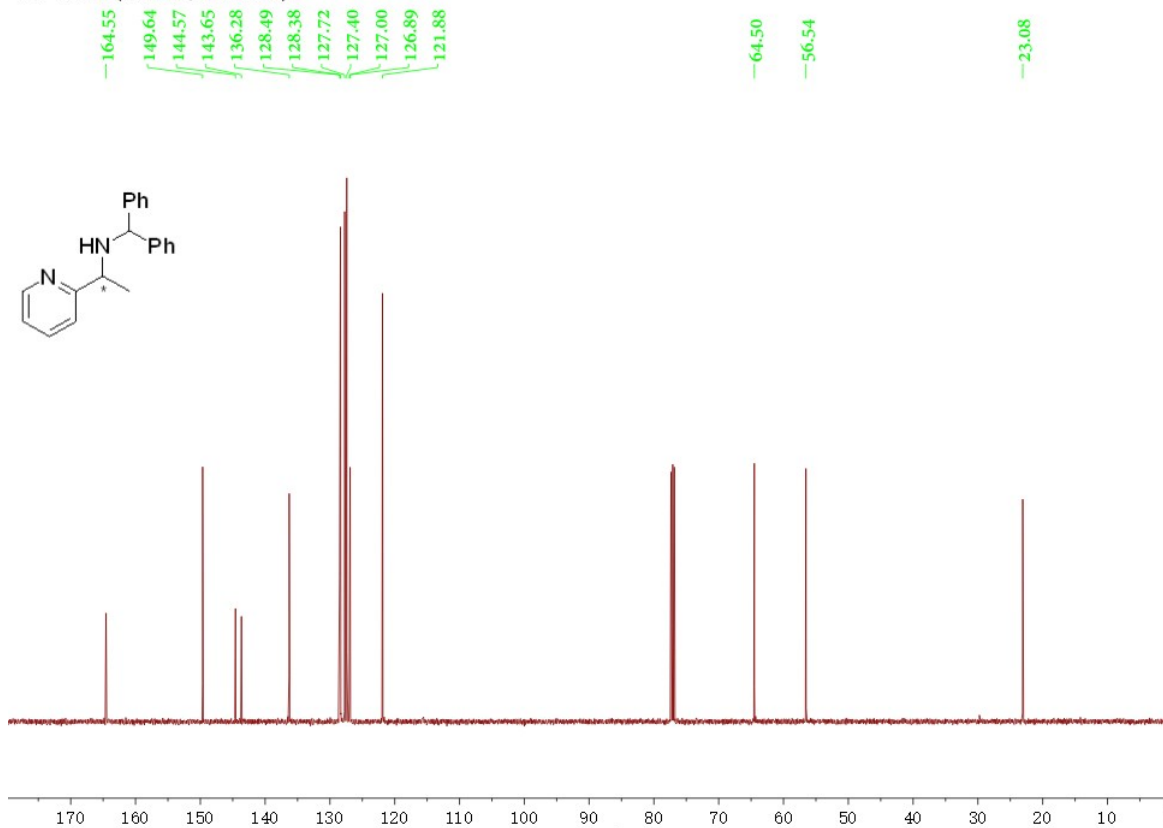

004C #25 RT: 0.38 AV: 1 NL: 280EB  
T: FTMS+pESI Full ms[200.00-2000.00]

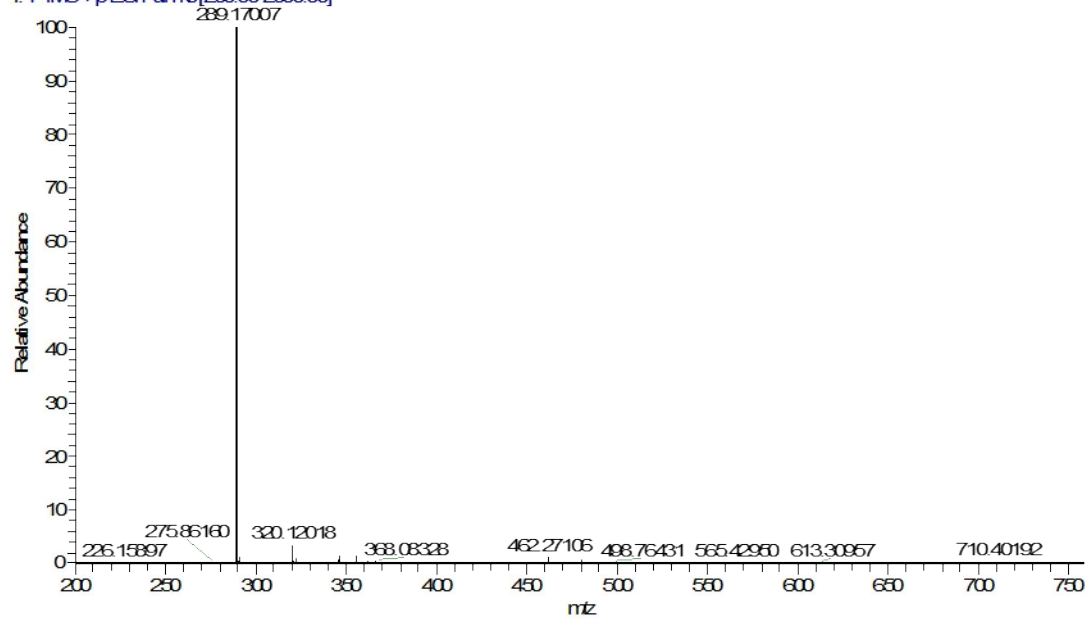

proton NMR for 3s (CDCl<sub>3</sub>, 500MHz)

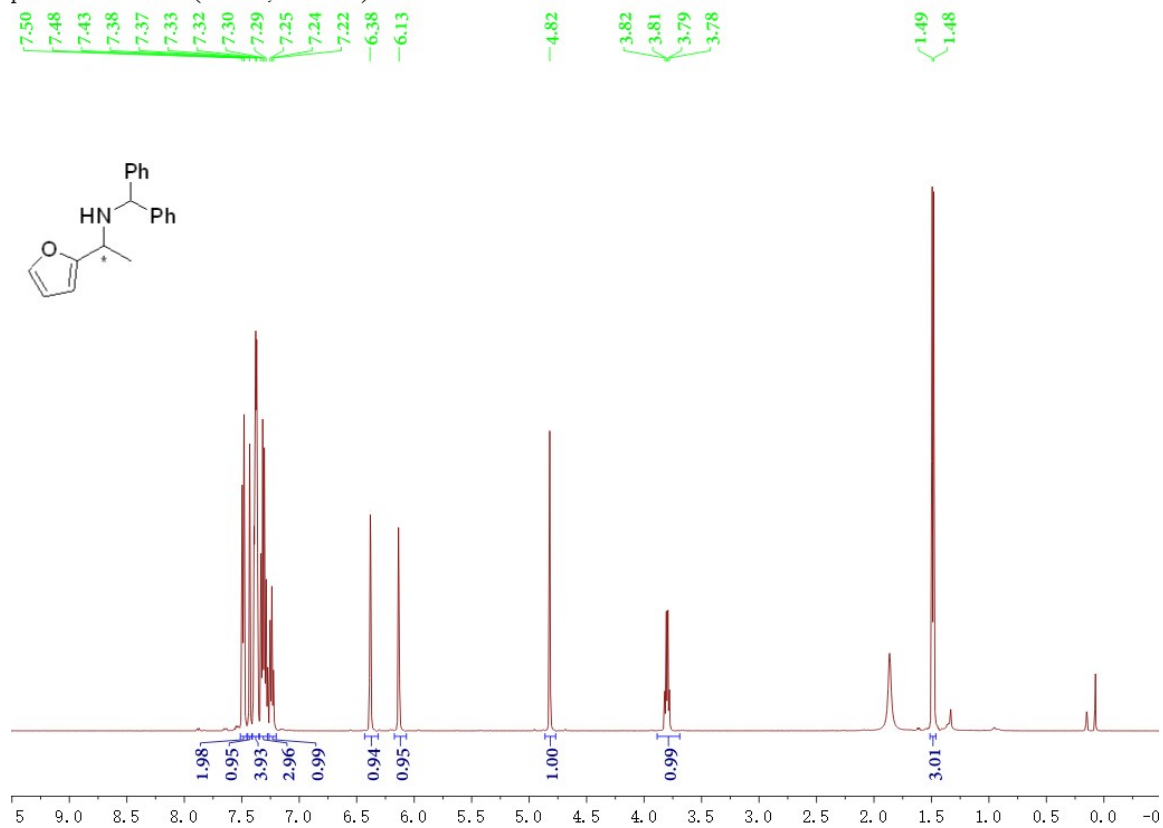

C13 for 3s (CDCl3, 125MHz)

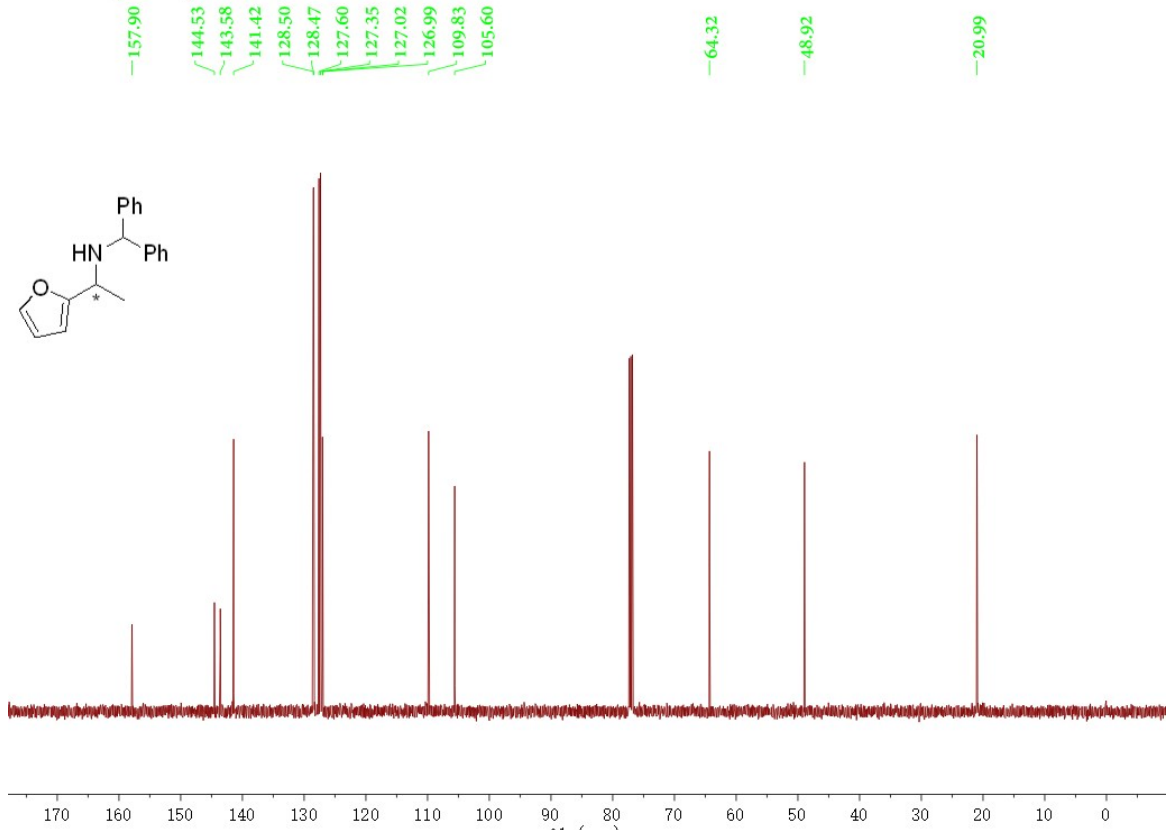

0010E #74 RT: 1.20 AV: 1 NL: 1.39EB  
T: FTMS+pESI Full ms [200.00-2000.00]

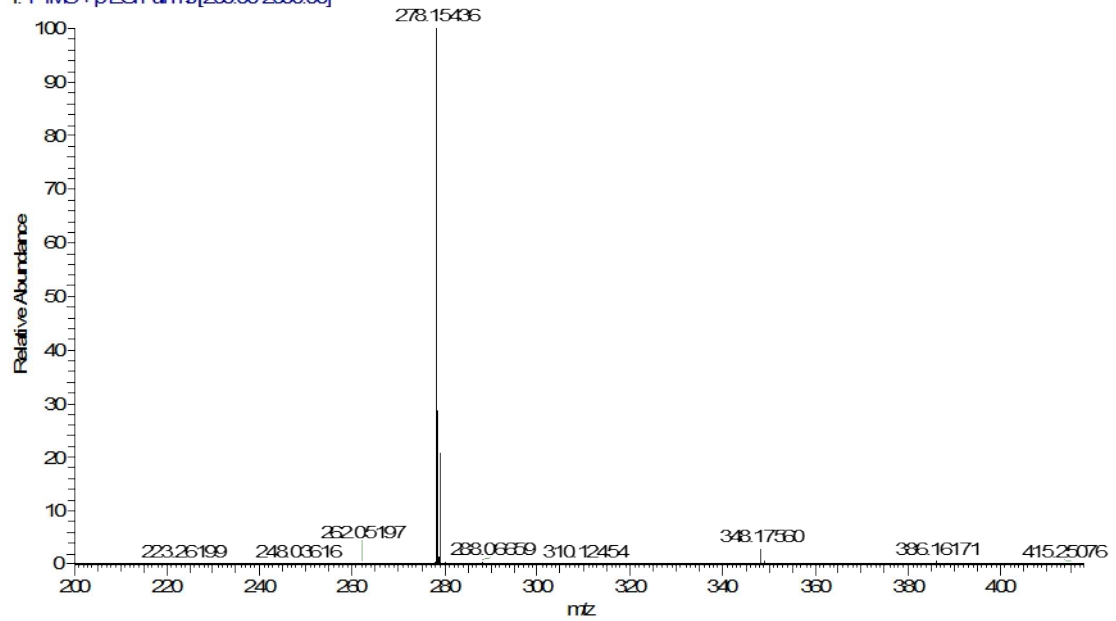

proton NMR for 3t (CDCl<sub>3</sub>, 500MHz)

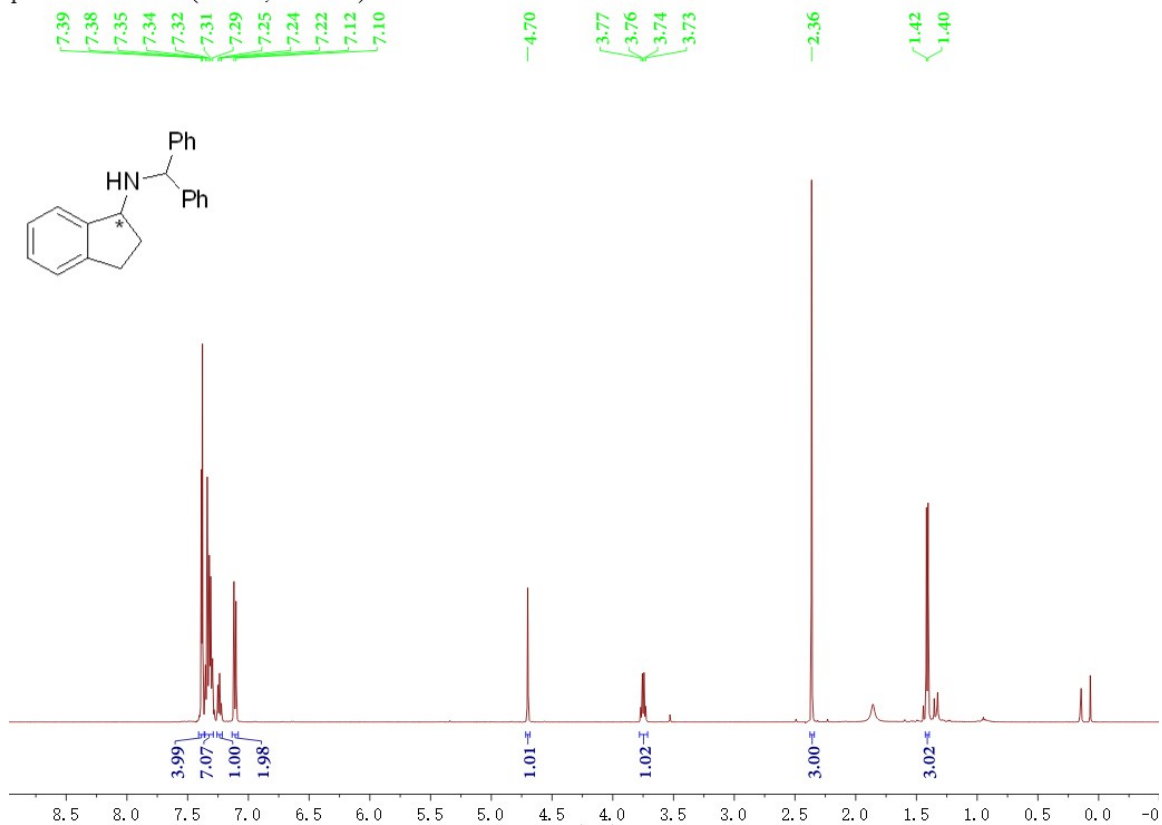

C13 for 3t (CDCl<sub>3</sub>, 125MHz)

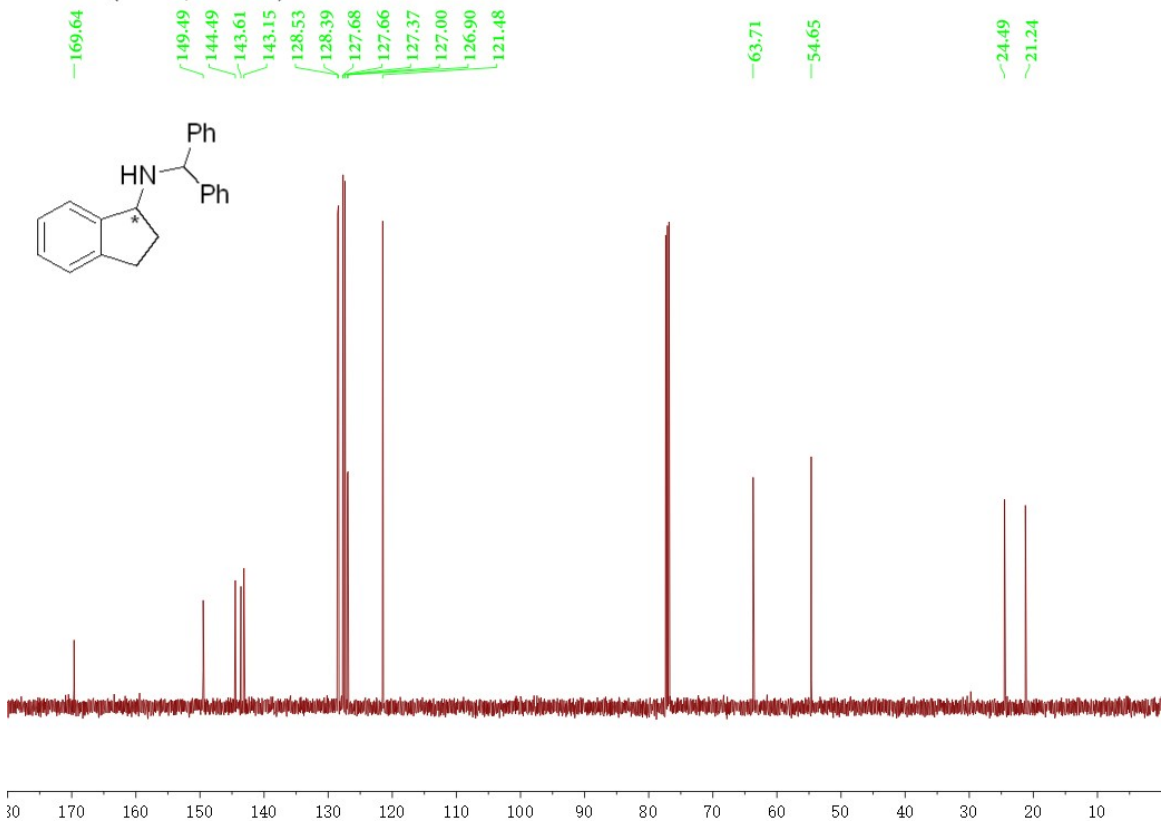

proton NMR for 3u (CDCl<sub>3</sub>, 500MHz)

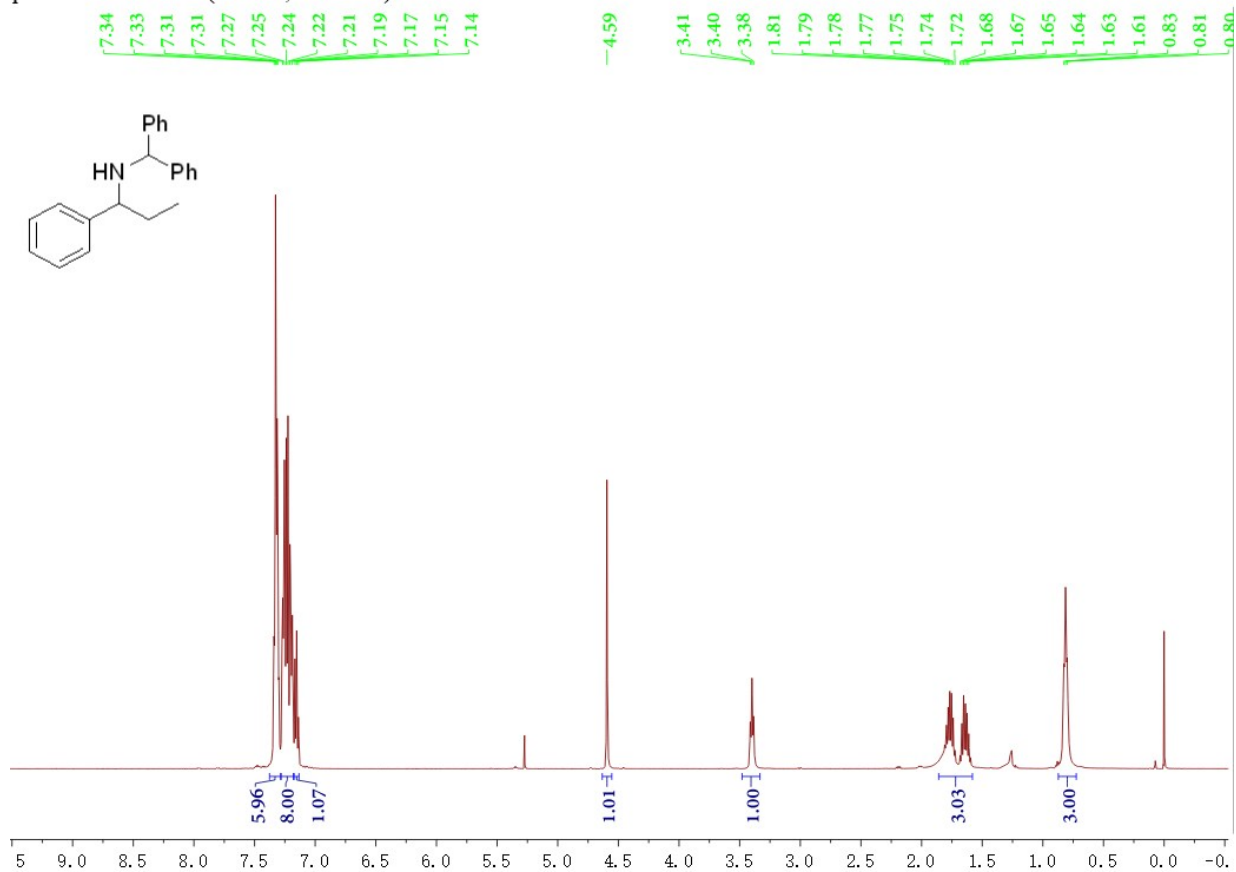

C13 for 3u (CDCl<sub>3</sub>, 125MHz)

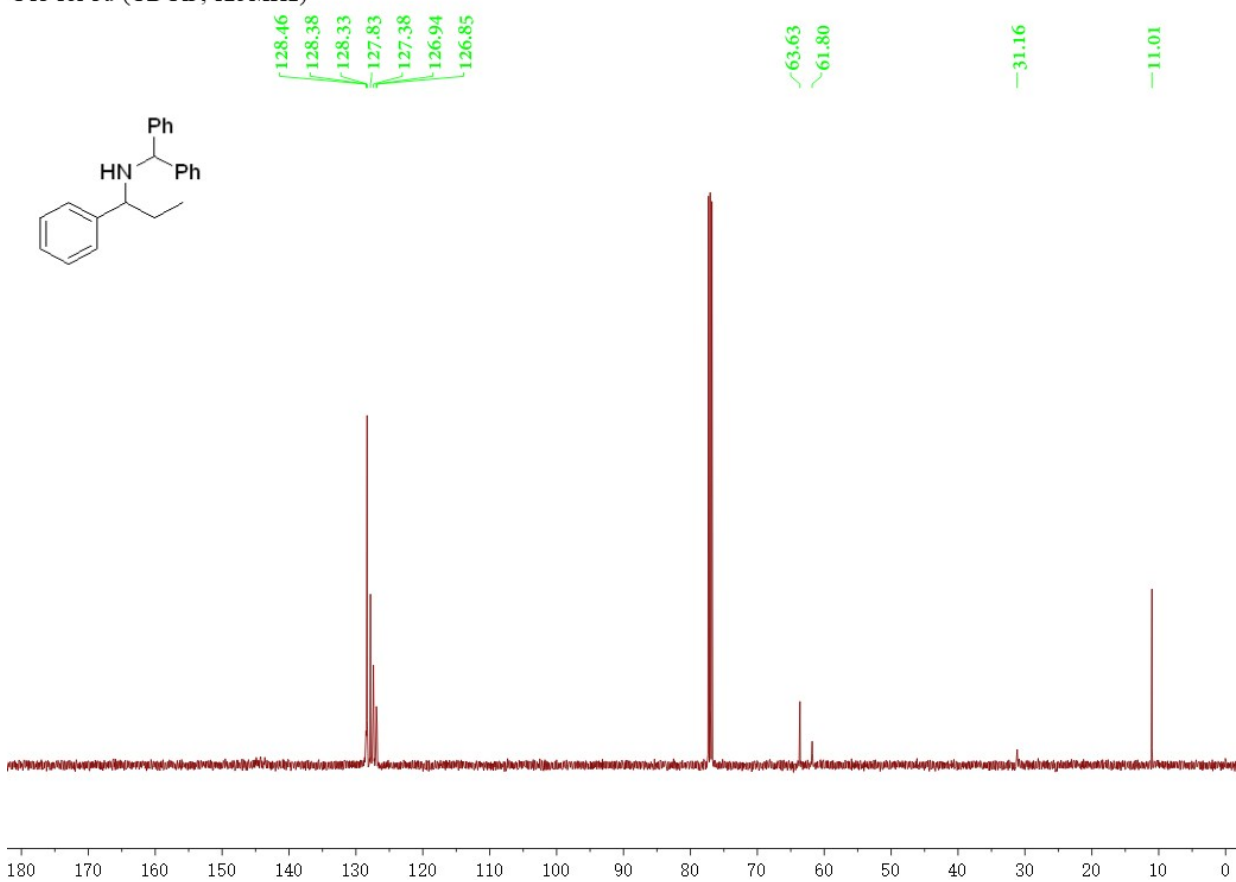

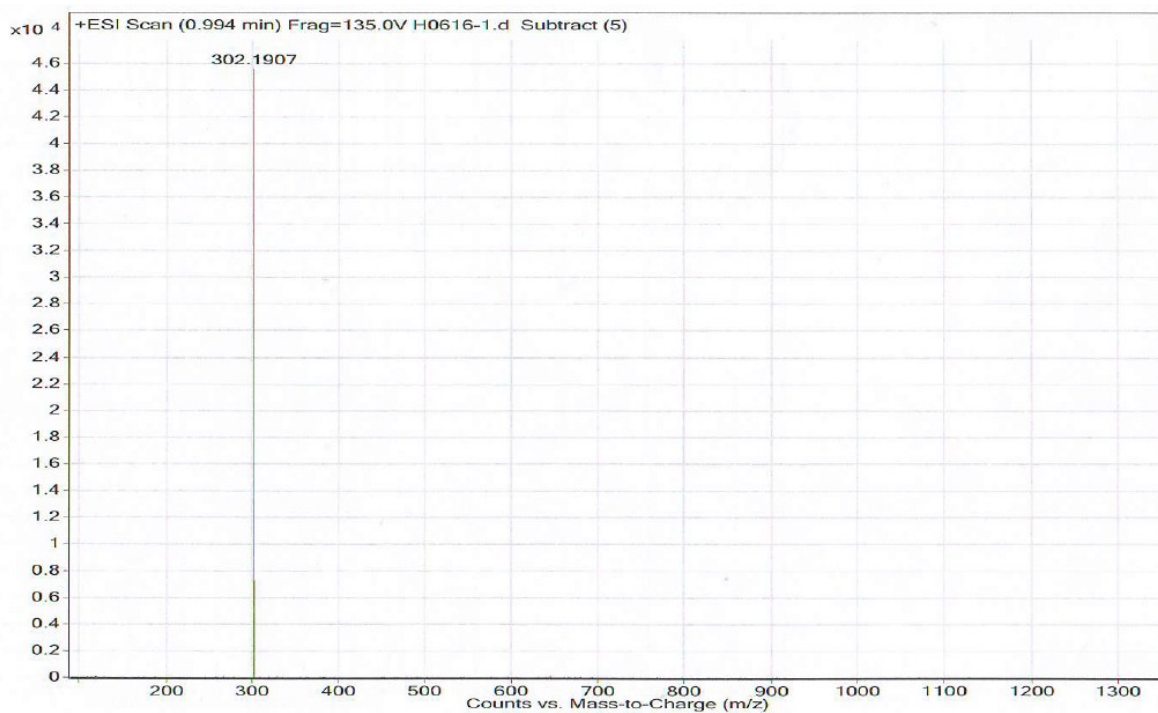

proton NMR for 6 (CDC13, 500MHz)

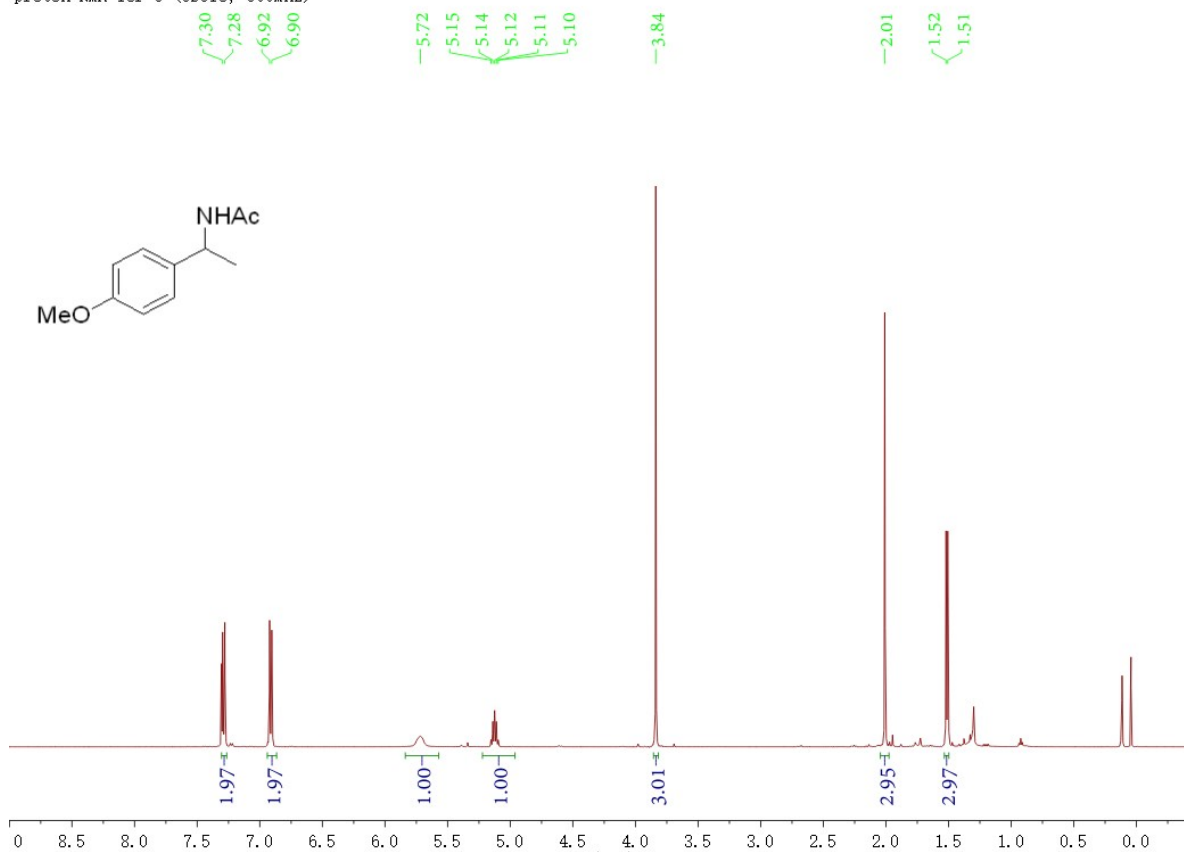



proton NMR for 7 (CDCl<sub>3</sub>, 500MHz)

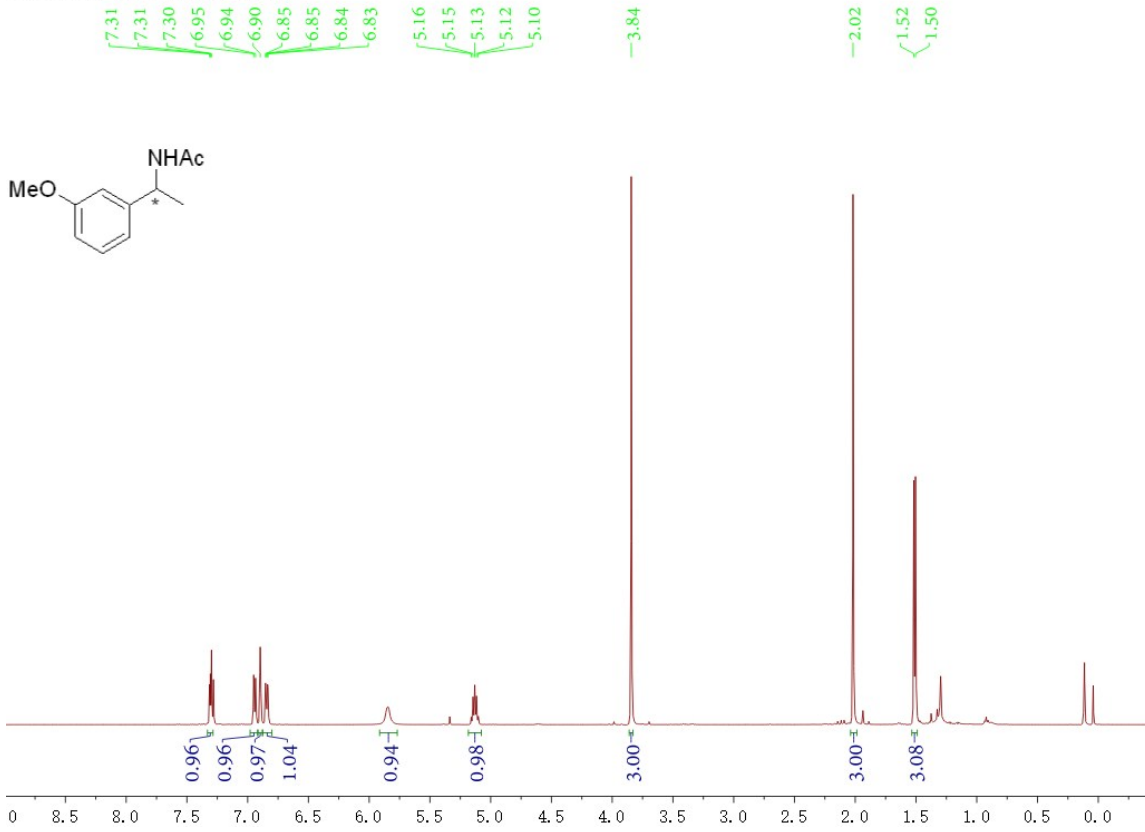

Supplement: c7qo00400a1.pdf [file c7qo00400a1.pdf]
